# Supplementary material for: Endothelial Cell Protein Targeting by Myeloperoxidase-Derived 2-Chlorofatty Aldehyde
Source: MDPI journal article supplement (doi:10.3390/antiox11050940), 2022-05-10
Supplement: s1 [file s1]

# Supplementary Materials: Endothelial Cell Protein Targeting by Myeloperoxidase-Derived 2-Chlorofatty Aldehyde

Shubha Shakya <sup>1,2</sup>, Roger A. Herr <sup>1,2</sup>, Haley L. Carlson <sup>1,2</sup>, Raphael A. Zoeller <sup>3</sup>, Carolyn J. Albert <sup>1,2</sup> and David A. Ford <sup>1,2,\*</sup>

<sup>1</sup> Center for Cardiovascular Research, Saint Louis University School of Medicine, St. Louis, MO 63104, USA; shubha.shakya@slu.edu (S.S.); r.a.herr@gmail.com (R.A.H.); haley.carlson@slu.edu (H.L.C.); carolyn.albert@health.slu.edu (C.J.A.)

<sup>2</sup> Edward A. Doisy Department of Biochemistry and Molecular Biology, Saint Louis University School of Medicine, St. Louis, MO 63104, USA

<sup>3</sup> Department of Physiology and Biophysics, Boston University School of Medicine, Boston, MA 02118, USA; rzoeller@bu.edu

\* Correspondence: david.ford@health.slu.edu

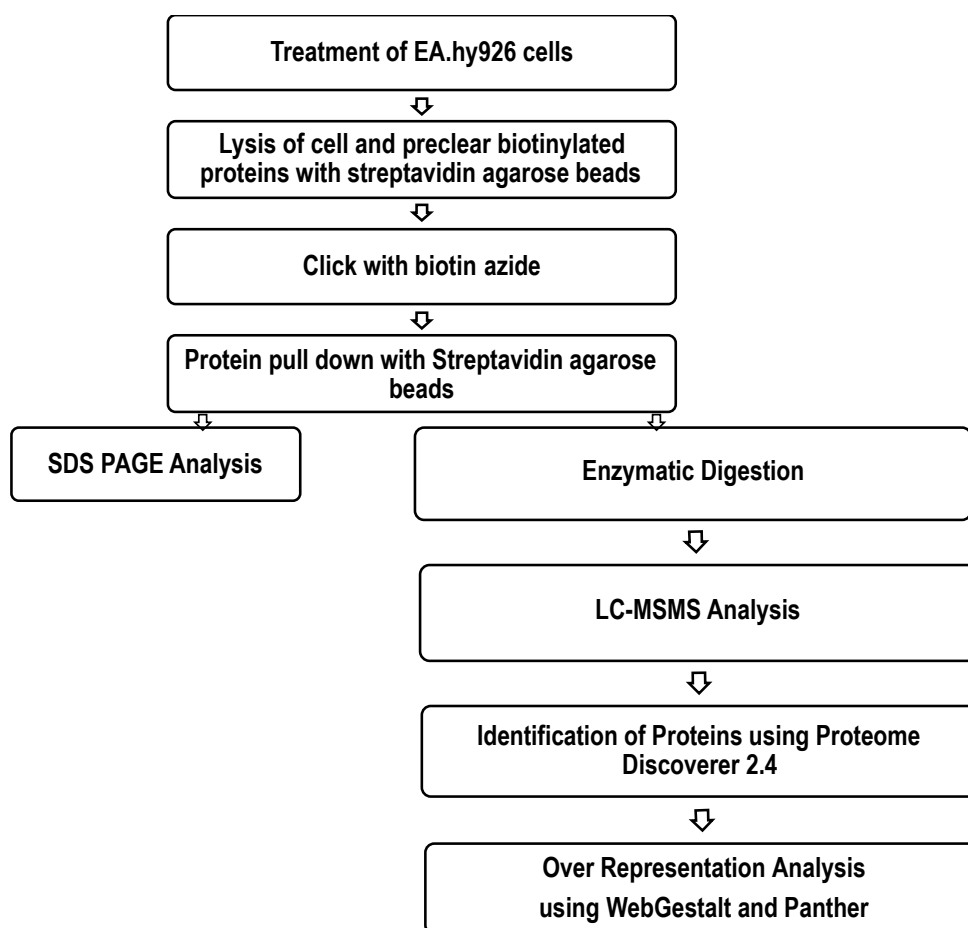

**Figure S1.** Schematic of workflow applied to identify the proteins modified by 2-ClHDyA. EA.hy926 cells were treated with DMSO, 10  $\mu$ M HDyA or 10  $\mu$ M ClHDyA for 1 h. Cells were lysed, clicked with azide-PEG3-biotin and incubated with streptavidin agarose beads. Streptavidin purified proteins were either used for SDS PAGE analysis or on-bead digestion. The digested peptides were subjected to LC-MS/MS and peptides were analyzed using and Proteome Discoverer 2.4 software. The WebGestalt tool was used to perform Over representation analysis.

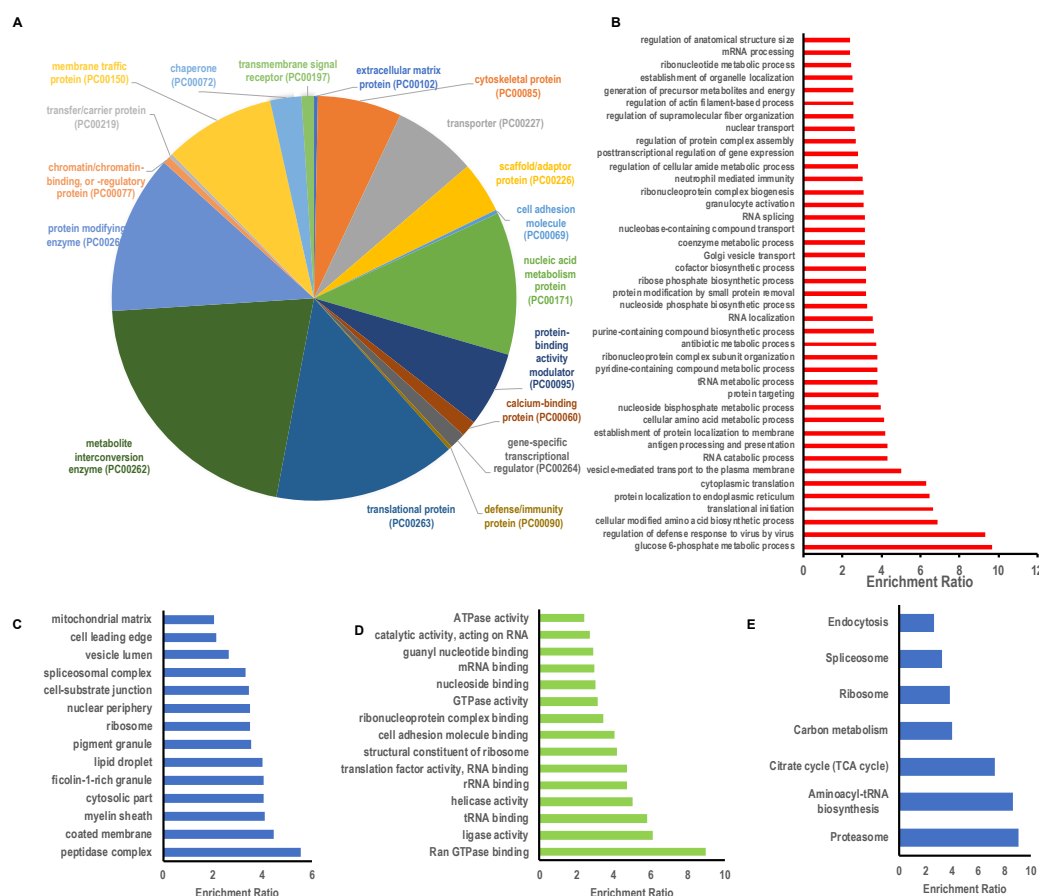

**Figure S2: Bioinformatic characterization of EA.hy926 cell proteins modified by 2-ClHDyA and HDyA:** (A) Distribution of 2-ClHDyA-modified proteins by protein class analyzed using Panther. (B-E) Over representation analysis using the Web-based Gene Set Analysis Toolkit (WebGestalt). Enriched categories in Gene ontology (GO) Biological function (B), Cellular component (C), Molecular function (D), and KEGG Pathway using Bonferroni  $P < 0.05$  for computing FDR ( $p < 0.05$ ) (E).

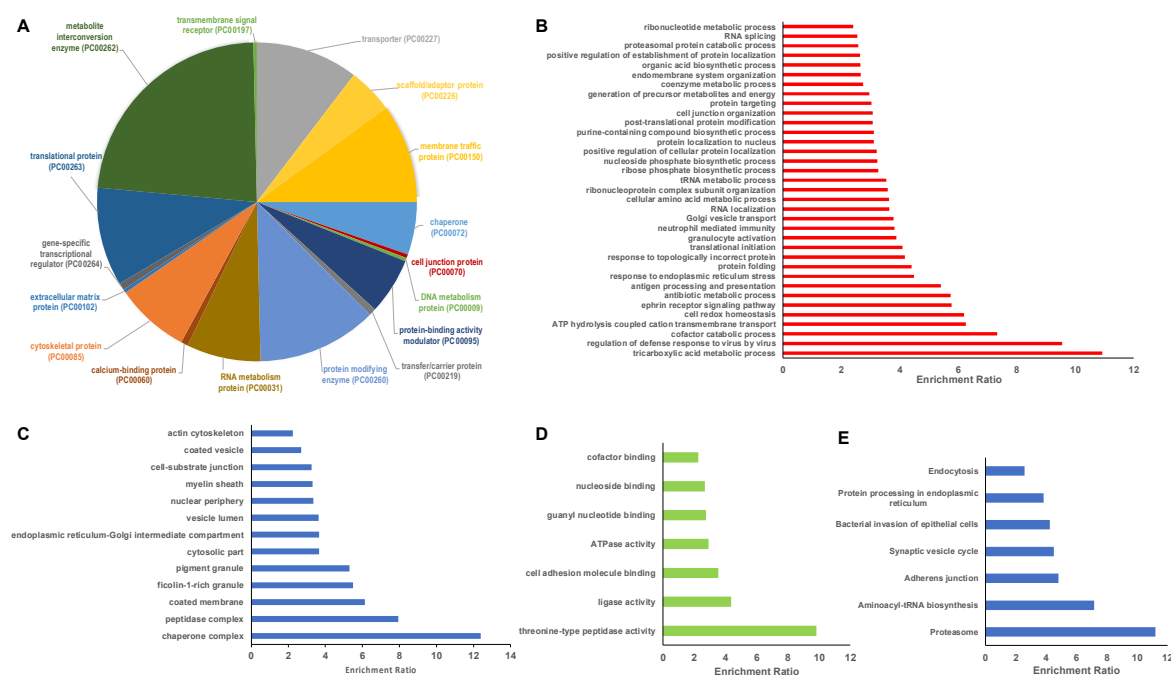

**Figure S3: Bioinformatic characterization of HLMVEC proteins modified by 2-ClHDyA and HDyA:** (A) Distribution of 2-ClHDyA-modified proteins by protein class analyzed using Panther. (B-E) Over representation analysis using the Web-based Gene Set Analysis Toolkit (WebGestalt). Enriched categories in Gene ontology (GO) Biological function (B), Cellular component (C), Molecular function (D), and KEGG Pathway using Bonferroni  $P < 0.05$  for computing FDR ( $p < 0.05$ ) (E).

**Table S1: List of 278 proteins modified by only 2-CIHDyA in EA.hy926 cells**

| Accession | Description                                                     | Gene Symbol | # Peptides | # PSMs | # Unique Peptides | Coverage [%] | Sum PEP Score | Biological Process                                                                                                 |
|-----------|-----------------------------------------------------------------|-------------|------------|--------|-------------------|--------------|---------------|--------------------------------------------------------------------------------------------------------------------|
| P61221    | ATP-binding cassette sub-family E member 1 [OS=Homo sapiens]    | ABCE1       | 6          | 44     | 6                 | 13           | 21.202        | cell organization and biogenesis;metabolic process;regulation of biological process;transport                      |
| P09110-1  | 3-ketoacyl-CoA thiolase, peroxisomal [OS=Homo sapiens]          | ACAA1       | 10         | 131    | 10                | 38           | 60.632        | metabolic process;transport                                                                                        |
| P42765    | 3-ketoacyl-CoA thiolase, mitochondrial [OS=Homo sapiens]        | ACAA2       | 6          | 42     | 6                 | 28           | 22.725        | cell organization and biogenesis;metabolic process;regulation of biological process;response to stimulus           |
| Q13085-1  | Acetyl-CoA carboxylase 1 [OS=Homo sapiens]                      | ACACA       | 6          | 41     | 6                 | 3            | 24.463        | cell organization and biogenesis;metabolic process;regulation of biological process;response to stimulus;transport |
| P24752    | Acetyl-CoA acetyltransferase, mitochondrial [OS=Homo sapiens]   | ACAT1       | 13         | 130    | 13                | 43           | 61.3          | cell organization and biogenesis;metabolic process;response to stimulus                                            |
| Q99798    | Aconitate hydratase, mitochondrial [OS=Homo sapiens]            | ACO2        | 5          | 18     | 5                 | 10           | 17.453        | metabolic process;response to stimulus                                                                             |
| Q9Y305-1  | Acyl-coenzyme A thioesterase 9, mitochondrial [OS=Homo sapiens] | ACOT9       | 4          | 30     | 4                 | 10           | 14.675        | metabolic process                                                                                                  |
| Q95573    | long-chain-fatty-acid--CoA ligase 3 [OS=Homo sapiens]           | ACSL3       | 5          | 46     | 3                 | 10           | 21.683        | cell organization and biogenesis;metabolic process;regulation of biological process;response to stimulus;transport |
| O60488-1  | Long-chain-fatty-acid--CoA ligase 4 [OS=Homo sapiens]           | ACSL4       | 6          | 44     | 4                 | 12           | 24.194        | cell differentiation;metabolic process;regulation of biological process;response to stimulus;transport             |
| P61163    | Alpha-centractin [OS=Homo sapiens]                              | ACTR1A      | 5          | 62     | 5                 | 24           | 26.894        | regulation of biological process;transport                                                                         |
| P61158    | actin-related protein 3 [OS=Homo sapiens]                       | ACTR3       | 8          | 81     | 8                 | 29           | 45.111        | cell division;cell organization and biogenesis;cellular component                                                  |

|          |                                                                                         |         |   |    |   |    |        |                                                                                                                                                                              |
|----------|-----------------------------------------------------------------------------------------|---------|---|----|---|----|--------|------------------------------------------------------------------------------------------------------------------------------------------------------------------------------|
|          |                                                                                         |         |   |    |   |    |        | movement;regulation of biological process;response to stimulus                                                                                                               |
| P37023   | Serine/threonine-protein kinase receptor R3 [OS=Homo sapiens]                           | ACVRL1  | 2 | 16 | 2 | 6  | 8.395  | cell differentiation;cell organization and biogenesis;cell proliferation;cellular component movement;metabolic process;regulation of biological process;response to stimulus |
| P30520   | adenylosuccinate synthetase isozyme 2 [OS=Homo sapiens]                                 | ADSS    | 4 | 54 | 4 | 13 | 26.475 | metabolic process;response to stimulus                                                                                                                                       |
| O00116   | Alkylidihydroxyacetonephosphate synthase, peroxisomal [OS=Homo sapiens]                 | AGPS    | 3 | 47 | 3 | 6  | 16.795 | metabolic process                                                                                                                                                            |
| Q13155   | aminoacyl tRNA synthase complex-interacting multifunctional protein 2 [OS=Homo sapiens] | AIMP2   | 3 | 21 | 3 | 17 | 12.218 | cell death;cell differentiation;cell organization and biogenesis;development;metabolic process;regulation of biological process                                              |
| P00568   | Adenylate kinase isoenzyme 1 [OS=Homo sapiens]                                          | AK1     | 2 | 31 | 2 | 13 | 7.818  | metabolic process                                                                                                                                                            |
| P15121   | aldose reductase [OS=Homo sapiens]                                                      | AKR1B1  | 5 | 92 | 4 | 11 | 25.171 | metabolic process;regulation of biological process;response to stimulus                                                                                                      |
| P49419   | Alpha-aminoadipic semialdehyde dehydrogenase [OS=Homo sapiens]                          | ALDH7A1 | 5 | 25 | 5 | 15 | 17.78  | metabolic process                                                                                                                                                            |
| P08133-1 | annexin A6 [OS=Homo sapiens]                                                            | ANXA6   | 4 | 31 | 4 | 7  | 13.608 | cell organization and biogenesis;cellular homeostasis;regulation of biological process;response to stimulus;transport                                                        |
| P20073-1 | Annexin A7 [OS=Homo sapiens]                                                            | ANXA7   | 4 | 48 | 4 | 10 | 20.365 | cell differentiation;cell organization and biogenesis;cell proliferation;cellular homeostasis;metabolic process;regulation of biological process;response to stimulus        |
| Q9BXS5-1 | AP-1 complex subunit mu-1 [OS=Homo sapiens]                                             | AP1M1   | 5 | 20 | 5 | 17 | 15.492 | cell organization and biogenesis;regulation of biological process;transport                                                                                                  |
| O95782   | AP-2 complex subunit alpha-1 [OS=Homo sapiens]                                          | AP2A1   | 8 | 94 | 3 | 11 | 31.456 | cell organization and biogenesis;cellular component                                                                                                                          |

|          |                                                   |       |   |     |   |    |        |                                                                                                                                                                            |
|----------|---------------------------------------------------|-------|---|-----|---|----|--------|----------------------------------------------------------------------------------------------------------------------------------------------------------------------------|
|          |                                                   |       |   |     |   |    |        | movement;metabolic process;regulation of biological process;response to stimulus;transport                                                                                 |
| O94973   | AP-2 complex subunit alpha-2<br>[OS=Homo sapiens] | AP2A2 | 9 | 71  | 4 | 13 | 30.102 | cell organization and biogenesis;cellular component movement;metabolic process;regulation of biological process;response to stimulus;transport                             |
| P63010-1 | AP-2 complex subunit beta<br>[OS=Homo sapiens]    | AP2B1 | 7 | 101 | 7 | 8  | 30.303 | cell organization and biogenesis;cellular component movement;metabolic process;regulation of biological process;response to stimulus;transport                             |
| Q96CW1   | AP-2 complex subunit mu<br>[OS=Homo sapiens]      | AP2M1 | 5 | 49  | 5 | 14 | 26.689 | cell organization and biogenesis;cellular component movement;metabolic process;regulation of biological process;response to stimulus;transport                             |
| O00203-1 | AP-3 complex subunit beta-1<br>[OS=Homo sapiens]  | AP3B1 | 2 | 22  | 2 | 3  | 7.489  | cell organization and biogenesis;cellular component movement;coagulation;regulation of biological process;transport                                                        |
| Q9Y2T2   | ap-3 complex subunit mu-1<br>[OS=Homo sapiens]    | AP3M1 | 2 | 23  | 2 | 6  | 7.702  | cellular component movement;transport                                                                                                                                      |
| P61204   | ADP-ribosylation factor 3<br>[OS=Homo sapiens]    | ARF3  | 7 | 86  | 4 | 51 | 42.394 | metabolic process;regulation of biological process;response to stimulus;transport                                                                                          |
| P18085   | ADP-ribosylation factor 4<br>[OS=Homo sapiens]    | ARF4  | 6 | 49  | 3 | 41 | 27.618 | cellular component movement;metabolic process;regulation of biological process;response to stimulus;transport                                                              |
| P62330   | ADP-ribosylation factor 6<br>[OS=Homo sapiens]    | ARF6  | 2 | 37  | 2 | 12 | 10.531 | cell death;cell differentiation;cell division;cell organization and biogenesis;cellular component movement;regulation of biological process;response to stimulus;transport |

|          |                                                                                     |                |   |    |   |    |        |                                                                                                                                                                                |
|----------|-------------------------------------------------------------------------------------|----------------|---|----|---|----|--------|--------------------------------------------------------------------------------------------------------------------------------------------------------------------------------|
| Q8N392-1 | Rho GTPase-activating protein 18 [OS=Homo sapiens]                                  | ARHGAP18       | 3 | 17 | 3 | 5  | 11.019 | cell organization and biogenesis;regulation of biological process;response to stimulus                                                                                         |
| P40616   | ADP-ribosylation factor-like protein 1 [OS=Homo sapiens]                            | ARL1           | 3 | 46 | 3 | 19 | 16.567 | cell organization and biogenesis;metabolic process;regulation of biological process;response to stimulus;transport                                                             |
| O15143   | Actin-related protein 2/3 complex subunit 1B [OS=Homo sapiens]                      | ARPC1B         | 3 | 45 | 3 | 11 | 16.043 | cell organization and biogenesis;cellular component movement;regulation of biological process;response to stimulus                                                             |
| O15144   | Actin-related protein 2/3 complex subunit 2 [OS=Homo sapiens]                       | ARPC2          | 4 | 41 | 4 | 12 | 14.602 | cell organization and biogenesis;cellular component movement;regulation of biological process;response to stimulus                                                             |
| Q6DD88   | Atlastin-3 [OS=Homo sapiens]                                                        | ATL3           | 4 | 66 | 4 | 11 | 27.694 | cell organization and biogenesis;regulation of biological process;transport                                                                                                    |
| Q9NQ88   | Fructose-2,6-bisphosphatase TIGAR [OS=Homo sapiens]                                 | C12orf5; TIGAR | 2 | 19 | 2 | 10 | 8.744  | cell death;metabolic process;regulation of biological process;response to stimulus                                                                                             |
| Q13557   | Calcium/calmodulin-dependent protein kinase type II subunit delta [OS=Homo sapiens] | CAMK2D         | 3 | 41 | 3 | 7  | 14.872 | cell differentiation;cell organization and biogenesis;cellular component movement;cellular homeostasis;metabolic process;regulation of biological process;response to stimulus |
| P27824   | Calnexin [OS=Homo sapiens]                                                          | CANX           | 4 | 27 | 4 | 8  | 18.981 | metabolic process;regulation of biological process;response to stimulus;transport                                                                                              |
| P07384   | Calpain-1 catalytic subunit [OS=Homo sapiens]                                       | CAPN1          | 4 | 51 | 4 | 7  | 22.1   | cell death;cell organization and biogenesis;metabolic process;regulation of biological process;transport                                                                       |
| P52907   | F-actin-capping protein subunit alpha-1 [OS=Homo sapiens]                           | CAPZA1         | 3 | 46 | 2 | 14 | 13.776 | cell organization and biogenesis;cellular component movement;coagulation;defense response;regulation of biological                                                             |

|        |                                                            |                    |   |     |   |    |        |                                                                                                                                                                                                                                                |
|--------|------------------------------------------------------------|--------------------|---|-----|---|----|--------|------------------------------------------------------------------------------------------------------------------------------------------------------------------------------------------------------------------------------------------------|
|        |                                                            |                    |   |     |   |    |        | process;response to stimulus;transport                                                                                                                                                                                                         |
| P47755 | F-actin-capping protein subunit alpha-2 [OS=Homo sapiens]  | CAPZA2             | 3 | 53  | 2 | 14 | 18.233 | cell organization and biogenesis;cellular component movement;coagulation;defense response;regulation of biological process;response to stimulus;transport                                                                                      |
| P04040 | catalase [OS=Homo sapiens]                                 | CAT                | 3 | 22  | 3 | 9  | 16.407 | cell differentiation;cell organization and biogenesis;metabolic process;regulation of biological process;response to stimulus;transport                                                                                                        |
| Q16543 | Hsp90 co-chaperone Cdc37 [OS=Homo sapiens]                 | CDC37              | 4 | 42  | 4 | 14 | 19.443 | cell division;metabolic process;regulation of biological process;response to stimulus;transport                                                                                                                                                |
| Q00535 | Cyclin-dependent-like kinase 5 [OS=Homo sapiens]           | CDK5               | 3 | 18  | 3 | 9  | 12.872 | cell communication;cell death;cell differentiation;cell division;cell growth;cell organization and biogenesis;cell proliferation;cellular component movement;metabolic process;regulation of biological process;response to stimulus;transport |
| O00299 | chloride intracellular channel protein 1 [OS=Homo sapiens] | CLIC1              | 7 | 124 | 7 | 45 | 47.443 | metabolic process;regulation of biological process;response to stimulus;transport                                                                                                                                                              |
| Q9Y696 | Chloride intracellular channel protein 4 [OS=Homo sapiens] | CLIC4              | 8 | 46  | 8 | 43 | 27.706 | cell differentiation;cell organization and biogenesis;cellular homeostasis;metabolic process;regulation of biological process;response to stimulus;transport                                                                                   |
| Q96KP4 | cytosolic non-specific dipeptidase [OS=Homo sapiens]       | CNDP2              | 3 | 15  | 3 | 10 | 8.701  | metabolic process                                                                                                                                                                                                                              |
| Q8NBJ5 | Procollagen galactosyltransferase 1 [OS=Homo sapiens]      | COLGAL T1; GLT25D1 | 5 | 38  | 5 | 9  | 21.911 |                                                                                                                                                                                                                                                |



|          |                                                                                  |        |   |     |   |    |        |                                                                                                                                                                                                                       |
|----------|----------------------------------------------------------------------------------|--------|---|-----|---|----|--------|-----------------------------------------------------------------------------------------------------------------------------------------------------------------------------------------------------------------------|
| P21964-1 | Catechol O-methyltransferase<br>[OS=Homo sapiens]                                | COMT   | 4 | 35  | 4 | 20 | 22.626 | cell communication;metabolic process;regulation of biological process;response to stimulus                                                                                                                            |
| P61923   | Coatomer subunit zeta-1<br>[OS=Homo sapiens]                                     | COPZ1  | 3 | 30  | 3 | 27 | 14.817 | transport                                                                                                                                                                                                             |
| Q99829   | Copine-1 [OS=Homo sapiens]                                                       | CPNE1  | 4 | 42  | 4 | 7  | 17.563 | cell differentiation;cell growth;metabolic process;regulation of biological process;response to stimulus;transport                                                                                                    |
| P36551   | Oxygen-dependent coproporphyrinogen-III oxidase, mitochondrial [OS=Homo sapiens] | CPOX   | 4 | 36  | 4 | 12 | 18.099 | metabolic process;response to stimulus                                                                                                                                                                                |
| P41240   | tyrosine-protein kinase CSK<br>[OS=Homo sapiens]                                 | CSK    | 3 | 14  | 3 | 8  | 9.862  | cell differentiation;cell organization and biogenesis;defense response;metabolic process;regulation of biological process;response to stimulus                                                                        |
| P56545   | c-terminal-binding protein 2<br>[OS=Homo sapiens]                                | CTBP2  | 2 | 25  | 1 | 6  | 9.605  | cell differentiation;metabolic process;regulation of biological process                                                                                                                                               |
| P35222   | Catenin beta-1 [OS=Homo sapiens]                                                 | CTNNB1 | 9 | 43  | 6 | 17 | 44.974 | cell communication;cell differentiation;cell growth;cell organization and biogenesis;cell proliferation;cellular component movement;metabolic process;regulation of biological process;response to stimulus;transport |
| Q43169   | Cytochrome b5 type B<br>[OS=Homo sapiens]                                        | CYB5B  | 3 | 49  | 3 | 45 | 24.678 | metabolic process;transport                                                                                                                                                                                           |
| Q6PI48   | Aspartate-tRNA ligase, mitochondrial [OS=Homo sapiens]                           | DARS2  | 3 | 37  | 3 | 6  | 13.475 | metabolic process                                                                                                                                                                                                     |
| Q9NR30-1 | Nucleolar RNA helicase 2<br>[OS=Homo sapiens]                                    | DDX21  | 6 | 42  | 6 | 9  | 21.475 | cell differentiation;metabolic process;regulation of biological process;response to stimulus                                                                                                                          |
| O00148   | ATP-dependent RNA helicase DDX39A [OS=Homo sapiens]                              | DDX39A | 9 | 184 | 2 | 23 | 48.632 | metabolic process;regulation of biological process;response to stimulus;transport                                                                                                                                     |

|          |                                                                                                                                       |         |    |     |   |    |        |                                                                                               |
|----------|---------------------------------------------------------------------------------------------------------------------------------------|---------|----|-----|---|----|--------|-----------------------------------------------------------------------------------------------|
| Q13838-1 | spliceosome RNA helicase<br>DDX39B [OS=Homo sapiens]                                                                                  | DDX39B  | 10 | 183 | 3 | 23 | 51.709 | cell organization and biogenesis;metabolic process;regulation of biological process;transport |
| Q86XP3-1 | ATP-dependent RNA helicase<br>DDX42 [OS=Homo sapiens]                                                                                 | DDX42   | 3  | 22  | 3 | 3  | 10.88  | metabolic process;regulation of biological process                                            |
| Q7L014   | probable ATP-dependent RNA helicase<br>DDX46 [OS=Homo sapiens]                                                                        | DDX46   | 8  | 106 | 8 | 10 | 36.291 | metabolic process;regulation of biological process                                            |
| P26196   | Probable ATP-dependent RNA helicase<br>DDX6 [OS=Homo sapiens]                                                                         | DDX6    | 7  | 72  | 7 | 20 | 32.456 | cell organization and biogenesis;metabolic process;regulation of biological process           |
| P23743-1 | diacylglycerol kinase alpha<br>[OS=Homo sapiens]                                                                                      | DGKA    | 3  | 12  | 3 | 6  | 9.986  | metabolic process;regulation of biological process;response to stimulus                       |
| P09622   | Dihydrolipoyl dehydrogenase, mitochondrial<br>[OS=Homo sapiens]                                                                       | DLD     | 4  | 42  | 4 | 13 | 15.742 | cellular homeostasis;metabolic process;regulation of biological process                       |
| P36957   | Dihydrolipoyllysine-residue succinyltransferase component of 2-oxoglutarate dehydrogenase complex, mitochondrial<br>[OS=Homo sapiens] | DLST    | 3  | 56  | 3 | 8  | 22.62  | metabolic process                                                                             |
| Q9UDY4   | DnaJ homolog subfamily B member 4 [OS=Homo sapiens]                                                                                   | DNAJB4  | 4  | 44  | 3 | 17 | 14.628 | metabolic process;regulation of biological process;response to stimulus                       |
| Q8IXB1-1 | DnaJ homolog subfamily C member 10 [OS=Homo sapiens]                                                                                  | DNAJC10 | 5  | 38  | 4 | 6  | 15.207 | cellular homeostasis;metabolic process;regulation of biological process;response to stimulus  |
| Q9Y295   | developmentally-regulated GTP-binding protein 1 [OS=Homo sapiens]                                                                     | DRG1    | 6  | 65  | 6 | 23 | 29.759 | development;metabolic process                                                                 |
| O75923-1 | dysferlin [OS=Homo sapiens]                                                                                                           | DYSF    | 3  | 20  | 3 | 2  | 13.4   | cell organization and biogenesis                                                              |
| Q15029   | 116 kDa U5 small nuclear ribonucleoprotein component<br>[OS=Homo sapiens]                                                             | EFTUD2  | 2  | 55  | 1 | 2  | 9.595  | cell organization and biogenesis;metabolic process;response to stimulus                       |
| Q9NZN4   | EH domain-containing protein 2<br>[OS=Homo sapiens]                                                                                   | EHD2    | 6  | 49  | 5 | 12 | 28.195 | cell organization and biogenesis;coagulation;regulation of biological process;transport       |
| Q9BY44-1 | Eukaryotic translation initiation factor 2A [OS=Homo sapiens]                                                                         | EIF2A   | 3  | 24  | 3 | 8  | 11.168 | cell organization and biogenesis;metabolic                                                    |

|          |                                                                                    |         |    |     |    |    |        |                                                                                                                                                                                                                      |
|----------|------------------------------------------------------------------------------------|---------|----|-----|----|----|--------|----------------------------------------------------------------------------------------------------------------------------------------------------------------------------------------------------------------------|
|          |                                                                                    |         |    |     |    |    |        | process;regulation of biological process;response to stimulus                                                                                                                                                        |
| P19525   | interferon-induced, double-stranded RNA-activated protein kinase [OS=Homo sapiens] | EIF2AK2 | 2  | 17  | 2  | 4  | 6.913  | cell communication;defense response;metabolic process;regulation of biological process;response to stimulus                                                                                                          |
| Q14152   | Eukaryotic translation initiation factor 3 subunit A [OS=Homo sapiens]             | EIF3A   | 12 | 109 | 12 | 11 | 53.257 | cell organization and biogenesis;metabolic process;regulation of biological process                                                                                                                                  |
| P60228   | Eukaryotic translation initiation factor 3 subunit E [OS=Homo sapiens]             | EIF3E   | 4  | 44  | 4  | 11 | 17.353 | metabolic process;regulation of biological process                                                                                                                                                                   |
| Q9Y262   | eukaryotic translation initiation factor 3 subunit L [OS=Homo sapiens]             | EIF3L   | 4  | 32  | 4  | 10 | 21.31  | metabolic process                                                                                                                                                                                                    |
| Q14240-1 | eukaryotic initiation factor 4A-II [OS=Homo sapiens]                               | EIF4A2  | 10 | 354 | 2  | 27 | 79.092 | metabolic process;regulation of biological process                                                                                                                                                                   |
| P38919   | Eukaryotic initiation factor 4A-III [OS=Homo sapiens]                              | EIF4A3  | 4  | 60  | 3  | 12 | 22.959 | metabolic process;regulation of biological process;response to stimulus;transport                                                                                                                                    |
| Q04637   | eukaryotic translation initiation factor 4 gamma 1 [OS=Homo sapiens]               | EIF4G1  | 3  | 16  | 3  | 2  | 13.446 | cell organization and biogenesis;defense response;metabolic process;regulation of biological process;response to stimulus                                                                                            |
| Q6IS14   | Eukaryotic translation initiation factor 5A-1-like [OS=Homo sapiens]               | EIF5AL1 | 3  | 13  | 3  | 33 | 8.843  | metabolic process;regulation of biological process;transport                                                                                                                                                         |
| P17813   | Endoglin [OS=Homo sapiens]                                                         | ENG     | 7  | 47  | 7  | 13 | 31.57  | cell differentiation;cell organization and biogenesis;cellular component movement;regulation of biological process;response to stimulus;transport                                                                    |
| P29317   | Ephrin type-A receptor 2 [OS=Homo sapiens]                                         | EPHA2   | 4  | 27  | 4  | 4  | 15.174 | cell death;cell differentiation;cell organization and biogenesis;cell proliferation;cellular component movement;defense response;development;metabolic process;regulation of biological process;response to stimulus |

|          |                                                                               |         |    |     |   |    |        |                                                                                                                                                                     |
|----------|-------------------------------------------------------------------------------|---------|----|-----|---|----|--------|---------------------------------------------------------------------------------------------------------------------------------------------------------------------|
| Q9NZ08-1 | endoplasmic reticulum aminopeptidase 1 [OS=Homo sapiens]                      | ERAP1   | 7  | 46  | 7 | 8  | 22.243 | cell communication;cell differentiation;metabolic process;regulation of biological process;response to stimulus                                                     |
| P84090   | Enhancer of rudimentary homolog [OS=Homo sapiens]                             | ERH     | 2  | 28  | 2 | 28 | 11.73  | metabolic process;regulation of biological process                                                                                                                  |
| Q9BSJ8   | Extended synaptotagmin-1 [OS=Homo sapiens]                                    | ESYT1   | 7  | 46  | 7 | 8  | 32.169 | metabolic process;transport                                                                                                                                         |
| A0FGR8-1 | Extended synaptotagmin-2 [OS=Homo sapiens]                                    | ESYT2   | 7  | 48  | 7 | 10 | 28.763 | metabolic process;transport                                                                                                                                         |
| P62495   | Eukaryotic peptide chain release factor subunit 1 [OS=Homo sapiens]           | ETF1    | 5  | 60  | 5 | 14 | 25.537 | cell organization and biogenesis;metabolic process;regulation of biological process                                                                                 |
| P13804-1 | Electron transfer flavoprotein subunit alpha, mitochondrial [OS=Homo sapiens] | ETFA    | 3  | 41  | 3 | 14 | 14.415 | metabolic process;transport                                                                                                                                         |
| P15311   | Ezrin [OS=Homo sapiens]                                                       | EZR     | 12 | 351 | 3 | 19 | 64.669 | cell differentiation;cell organization and biogenesis;cellular component movement;metabolic process;regulation of biological process;response to stimulus;transport |
| Q9NZB2-1 | Constitutive coactivator of PPAR-gamma-like protein 1 [OS=Homo sapiens]       | FAM120A | 6  | 38  | 6 | 8  | 16.621 |                                                                                                                                                                     |
| Q96TA1   | Niban-like protein 1 [OS=Homo sapiens]                                        | FAM129B | 8  | 106 | 8 | 12 | 36.864 | cell differentiation;cellular component movement;metabolic process;regulation of biological process;transport                                                       |
| Q9BRX8-1 | Redox-regulatory protein FAM213A [OS=Homo sapiens]                            | FAM213A | 8  | 170 | 8 | 34 | 41.341 | metabolic process;regulation of biological process                                                                                                                  |
| Q9NSD9   | Phenylalanine-tRNA ligase beta subunit [OS=Homo sapiens]                      | FARSB   | 5  | 60  | 5 | 9  | 19.341 | cell organization and biogenesis;metabolic process                                                                                                                  |
| P39748   | Flap endonuclease 1 [OS=Homo sapiens]                                         | FEN1    | 2  | 25  | 2 | 8  | 9.925  | cell organization and biogenesis;cellular homeostasis;metabolic process;regulation of biological process;response to stimulus                                       |

|          |                                                                                       |         |    |     |    |    |        |                                                                                                                                                             |
|----------|---------------------------------------------------------------------------------------|---------|----|-----|----|----|--------|-------------------------------------------------------------------------------------------------------------------------------------------------------------|
| P07954   | fumarate hydratase, mitochondrial [OS=Homo sapiens]                                   | FH      | 3  | 44  | 3  | 10 | 18.554 | metabolic process                                                                                                                                           |
| P51570   | galactokinase [OS=Homo sapiens]                                                       | GALK1   | 3  | 29  | 3  | 11 | 11.034 | metabolic process                                                                                                                                           |
| Q04446   | 1,4-alpha-glucan-branching enzyme [OS=Homo sapiens]                                   | GBE1    | 6  | 47  | 6  | 15 | 27.184 | metabolic process                                                                                                                                           |
| Q06210-1 | glutamine-fructose-6-phosphate aminotransferase [isomerizing] 1 [OS=Homo sapiens]     | GFPT1   | 7  | 48  | 7  | 14 | 24.276 | metabolic process;regulation of biological process                                                                                                          |
| P04899-1 | guanine nucleotide-binding protein G(i) subunit alpha-2 [OS=Homo sapiens]             | GNAI2   | 7  | 82  | 6  | 30 | 26.672 | cell division;cell proliferation;metabolic process;regulation of biological process;response to stimulus                                                    |
| Q5JWF2-1 | Guanine nucleotide-binding protein G(S) subunit alpha isoforms XLas [OS=Homo sapiens] | GNAS    | 4  | 80  | 3  | 5  | 21.463 | metabolic process;regulation of biological process;response to stimulus                                                                                     |
| P62873   | Guanine nucleotide-binding protein G(I)/G(S)/G(T) subunit beta-1 [OS=Homo sapiens]    | GNB1    | 4  | 33  | 4  | 14 | 21.165 | cell death;cell organization and biogenesis;cell proliferation;cellular homeostasis;metabolic process;regulation of biological process;response to stimulus |
| P62879   | Guanine nucleotide-binding protein G(I)/G(S)/G(T) subunit beta-2 [OS=Homo sapiens]    | GNB2    | 3  | 42  | 3  | 10 | 21.707 | metabolic process;regulation of biological process;response to stimulus                                                                                     |
| Q9Y2Q3-1 | Glutathione S-transferase kappa 1 [OS=Homo sapiens]                                   | GSTK1   | 3  | 39  | 3  | 20 | 14.809 | cell differentiation;metabolic process                                                                                                                      |
| P40939   | Trifunctional enzyme subunit alpha, mitochondrial [OS=Homo sapiens]                   | HADHA   | 11 | 180 | 11 | 20 | 71.612 | metabolic process;response to stimulus                                                                                                                      |
| Q00341-1 | Vigilin [OS=Homo sapiens]                                                             | HDLBP   | 11 | 127 | 11 | 12 | 47.817 | metabolic process;transport                                                                                                                                 |
| Q8TCT9-1 | Minor histocompatibility antigen H13 [OS=Homo sapiens]                                | HM13    | 3  | 26  | 3  | 12 | 16.831 | cell organization and biogenesis;metabolic process                                                                                                          |
| P51991-1 | Heterogeneous nuclear ribonucleoprotein A3 [OS=Homo sapiens]                          | HNRNPA3 | 7  | 95  | 5  | 20 | 39.782 | metabolic process;transport                                                                                                                                 |
| P52597   | Heterogeneous nuclear ribonucleoprotein F [OS=Homo sapiens]                           | HNRNPF  | 7  | 181 | 5  | 26 | 47.484 | metabolic process;regulation of biological process;response to stimulus                                                                                     |

|          |                                                                       |         |    |     |    |    |        |                                                                                                                                                                |
|----------|-----------------------------------------------------------------------|---------|----|-----|----|----|--------|----------------------------------------------------------------------------------------------------------------------------------------------------------------|
| P55795   | heterogeneous nuclear ribonucleoprotein H2 [OS=Homo sapiens]          | HNRNPH2 | 12 | 303 | 5  | 34 | 94.078 | metabolic process                                                                                                                                              |
| P31942   | Heterogeneous nuclear ribonucleoprotein H3 [OS=Homo sapiens]          | HNRNPH3 | 4  | 72  | 3  | 17 | 24.351 | cell differentiation;metabolic process                                                                                                                         |
| P14866   | Heterogeneous nuclear ribonucleoprotein L [OS=Homo sapiens]           | HNRNPL  | 7  | 43  | 7  | 19 | 21.286 | metabolic process;regulation of biological process                                                                                                             |
| O43390-1 | heterogeneous nuclear ribonucleoprotein r [OS=Homo sapiens]           | HNRNPR  | 5  | 67  | 2  | 9  | 20.585 | metabolic process;regulation of biological process                                                                                                             |
| Q5SSJ5-1 | Heterochromatin protein 1-binding protein 3 [OS=Homo sapiens]         | HP1BP3  | 6  | 62  | 6  | 11 | 22.697 | cell organization and biogenesis;regulation of biological process;response to stimulus                                                                         |
| P51659-1 | peroxisomal multifunctional enzyme type 2 [OS=Homo sapiens]           | HSD17B4 | 5  | 34  | 5  | 10 | 22.901 | cell differentiation;metabolic process                                                                                                                         |
| Q92598   | Heat shock protein 105 kDa [OS=Homo sapiens]                          | HSPH1   | 12 | 154 | 10 | 19 | 76.728 | metabolic process;regulation of biological process;response to stimulus;transport                                                                              |
| Q7Z6Z7   | E3 ubiquitin-protein ligase HUWE1 [OS=Homo sapiens]                   | HUWE1   | 9  | 42  | 9  | 3  | 35.443 | cell differentiation;cell organization and biogenesis;metabolic process;response to stimulus;transport                                                         |
| Q9NSE4   | Isoleucine--tRNA ligase, mitochondrial [OS=Homo sapiens]              | IARS2   | 5  | 49  | 5  | 6  | 23.511 | metabolic process;regulation of biological process                                                                                                             |
| Q16666-1 | gamma-interferon-inducible protein 16 [OS=Homo sapiens]               | IFI16   | 5  | 56  | 5  | 8  | 23.879 | cell communication;cell death;cell differentiation;cell proliferation;defense response;metabolic process;regulation of biological process;response to stimulus |
| Q9NZI8   | Insulin-like growth factor 2 mRNA-binding protein 1 [OS=Homo sapiens] | IGF2BP1 | 6  | 121 | 5  | 14 | 34.943 | cell proliferation;regulation of biological process;transport                                                                                                  |
| Q9Y6M1   | Insulin-like growth factor 2 mRNA-binding protein 2 [OS=Homo sapiens] | IGF2BP2 | 8  | 102 | 6  | 18 | 40.57  | regulation of biological process;transport                                                                                                                     |

|          |                                                                                               |        |    |     |    |    |        |                                                                                                                                                |
|----------|-----------------------------------------------------------------------------------------------|--------|----|-----|----|----|--------|------------------------------------------------------------------------------------------------------------------------------------------------|
| Q70UQ0   | Inhibitor of nuclear factor kappa-B kinase-interacting protein [OS=Homo sapiens]              | IKBIP  | 7  | 46  | 5  | 20 | 27.242 | response to stimulus                                                                                                                           |
| Q70UQ0-4 | Isoform 4 of Inhibitor of nuclear factor kappa-B kinase-interacting protein [OS=Homo sapiens] | IKBIP  | 10 | 53  | 8  | 31 | 47.702 | response to stimulus                                                                                                                           |
| Q8TEX9-1 | Importin-4 [OS=Homo sapiens]                                                                  | IPO4   | 5  | 28  | 5  | 5  | 21.79  | cell organization and biogenesis;transport                                                                                                     |
| Q95373   | Importin-7 [OS=Homo sapiens]                                                                  | IPO7   | 7  | 51  | 6  | 9  | 30.846 | defense response;regulation of biological process;response to stimulus;transport                                                               |
| Q96P70   | Importin-9 [OS=Homo sapiens]                                                                  | IPO9   | 2  | 23  | 2  | 4  | 19.99  | transport                                                                                                                                      |
| Q15046   | Lysine--tRNA ligase [OS=Homo sapiens]                                                         | KARS   | 10 | 46  | 10 | 19 | 34.724 | metabolic process;regulation of biological process;response to stimulus                                                                        |
| O00139   | Kinesin-like protein KIF2A [OS=Homo sapiens]                                                  | KIF2A  | 3  | 20  | 3  | 4  | 9.089  | cell differentiation;cell division;cell organization and biogenesis;cellular component movement;development;transport                          |
| Q14974   | Importin subunit beta-1 [OS=Homo sapiens]                                                     | KPNB1  | 6  | 66  | 6  | 9  | 27.52  | cell organization and biogenesis;cellular component movement;metabolic process;regulation of biological process;response to stimulus;transport |
| Q9P2J5   | Leucine--tRNA ligase, cytoplasmic [OS=Homo sapiens]                                           | LARS   | 9  | 114 | 9  | 10 | 38.862 | cell communication;cell organization and biogenesis;metabolic process;regulation of biological process;response to stimulus;transport          |
| P49257   | Protein ERGIC-53 [OS=Homo sapiens]                                                            | LMAN1  | 3  | 36  | 3  | 6  | 10.963 | cell organization and biogenesis;coagulation;metabolic process;regulation of biological process;transport                                      |
| P42704   | Leucine-rich PPR motif-containing protein, mitochondrial [OS=Homo sapiens]                    | LRPPRC | 12 | 107 | 12 | 12 | 54.149 | cellular component movement;metabolic process;regulation of biological process;transport                                                       |
| P09960-1 | leukotriene A-4 hydrolase [OS=Homo sapiens]                                                   | LTA4H  | 6  | 68  | 6  | 12 | 44.086 | metabolic process;transport                                                                                                                    |

|          |                                                                                        |         |    |     |   |    |        |                                                                                                             |
|----------|----------------------------------------------------------------------------------------|---------|----|-----|---|----|--------|-------------------------------------------------------------------------------------------------------------|
| Q9UPN3   | Microtubule-actin cross-linking factor 1, isoforms 1/2/3/5 [OS=Homo sapiens]           | MACF1   | 15 | 128 | 4 | 2  | 52.118 | cell organization and biogenesis;regulation of biological process;response to stimulus;transport            |
| P27816-1 | Microtubule-associated protein 4 [OS=Homo sapiens]                                     | MAP4    | 3  | 23  | 3 | 4  | 9.727  | cell division;cell organization and biogenesis;cellular component movement;regulation of biological process |
| P56192   | Methionine--tRNA ligase, cytoplasmic [OS=Homo sapiens]                                 | MARS    | 4  | 45  | 4 | 6  | 14.988 | cell communication;metabolic process;regulation of biological process;response to stimulus                  |
| P49736   | DNA replication licensing factor mcm2 [OS=Homo sapiens]                                | MCM2    | 5  | 53  | 5 | 7  | 22.048 | cell death;cell organization and biogenesis;metabolic process;response to stimulus                          |
| Q14566   | DNA replication licensing factor MCM6 [OS=Homo sapiens]                                | MCM6    | 5  | 52  | 5 | 10 | 25.499 | metabolic process                                                                                           |
| P33993-1 | DNA replication licensing factor MCM7 [OS=Homo sapiens]                                | MCM7    | 7  | 47  | 7 | 13 | 22.492 | cell proliferation;metabolic process;regulation of biological process;response to stimulus                  |
| O60502   | protein O-GlcNAcase [OS=Homo sapiens]                                                  | MGEA5   | 3  | 10  | 3 | 4  | 11.843 | metabolic process                                                                                           |
| Q6UB35-1 | Monofunctional C1-tetrahydrofolate synthase, mitochondrial [OS=Homo sapiens]           | MTHFD1L | 3  | 33  | 3 | 4  | 13.247 | metabolic process                                                                                           |
| Q9BXJ9   | N-alpha-acetyltransferase 15, NatA auxiliary subunit [OS=Homo sapiens]                 | NAA15   | 6  | 55  | 6 | 7  | 24.723 | cell differentiation;development;metabolic process;regulation of biological process                         |
| O43776   | Asparagine--tRNA ligase, cytoplasmic [OS=Homo sapiens]                                 | NARS    | 5  | 37  | 5 | 9  | 22.133 | metabolic process                                                                                           |
| Q6PIU2   | Neutral cholesterol ester hydrolase 1 [OS=Homo sapiens]                                | NCEH1   | 6  | 123 | 6 | 23 | 41.476 | metabolic process                                                                                           |
| Q9Y2A7-1 | Nck-associated protein 1 [OS=Homo sapiens]                                             | NCKAP1  | 7  | 43  | 7 | 9  | 22.595 | cell death;cell organization and biogenesis;regulation of biological process;response to stimulus           |
| O75251   | NADH dehydrogenase [ubiquinone] iron-sulfur protein 7, mitochondrial [OS=Homo sapiens] | NDUFS7  | 2  | 27  | 2 | 11 | 13.756 | cell organization and biogenesis;metabolic process;transport                                                |



|          |                                                             |               |   |    |   |    |        |                                                                                                                                                     |
|----------|-------------------------------------------------------------|---------------|---|----|---|----|--------|-----------------------------------------------------------------------------------------------------------------------------------------------------|
| Q8TD19   | Serine/threonine-protein kinase Nek9 [OS=Homo sapiens]      | NEK9          | 2 | 20 | 2 | 2  | 10.033 | cell division;cell organization and biogenesis;metabolic process                                                                                    |
| P55769   | NHP2-like protein 1 [OS=Homo sapiens]                       | NHP2L1; SNU13 | 2 | 17 | 2 | 19 | 8.397  | cell organization and biogenesis;metabolic process                                                                                                  |
| O00567   | Nucleolar protein 56 [OS=Homo sapiens]                      | NOP56         | 6 | 49 | 6 | 16 | 24.337 | metabolic process                                                                                                                                   |
| P06748   | Nucleophosmin [OS=Homo sapiens]                             | NPM1          | 3 | 42 | 3 | 14 | 13.756 | cell growth;cell organization and biogenesis;cellular homeostasis;metabolic process;regulation of biological process;response to stimulus;transport |
| Q9BSD7   | Cancer-related nucleoside-triphosphatase [OS=Homo sapiens]  | NTPCR         | 2 | 25 | 2 | 14 | 12.919 | metabolic process;response to stimulus                                                                                                              |
| Q8N1F7-1 | Nuclear pore complex protein Nup93 [OS=Homo sapiens]        | NUP93         | 3 | 21 | 3 | 5  | 11.066 | cell organization and biogenesis;cellular component movement;metabolic process;regulation of biological process;response to stimulus;transport      |
| P04181-1 | Ornithine aminotransferase, mitochondrial [OS=Homo sapiens] | OAT           | 5 | 48 | 5 | 14 | 21.912 | cell organization and biogenesis;metabolic process                                                                                                  |
| Q56VL3   | OCIA domain-containing protein 2 [OS=Homo sapiens]          | OCIAD2        | 3 | 23 | 3 | 20 | 11.771 |                                                                                                                                                     |
| Q96FW1   | Ubiquitin thioesterase otub1 [OS=Homo sapiens]              | OTUB1         | 3 | 23 | 3 | 13 | 11.909 | metabolic process;regulation of biological process;response to stimulus                                                                             |
| P07237   | Protein disulfide-isomerase [OS=Homo sapiens]               | P4HB          | 5 | 82 | 5 | 11 | 26.87  | cell organization and biogenesis;cellular homeostasis;metabolic process;regulation of biological process;response to stimulus                       |
| Q13177   | Serine/threonine-protein kinase PAK 2 [OS=Homo sapiens]     | PAK2          | 5 | 26 | 5 | 14 | 16.71  | cell death;cell organization and biogenesis;cellular component movement;metabolic process;regulation of biological process;response to stimulus     |
| Q99497   | protein/nucleic acid deglycase DJ-1 [OS=Homo sapiens]       | PARK7         | 6 | 49 | 6 | 46 | 21.783 | cell communication;cell organization and biogenesis;defense                                                                                         |

|          |                                                                                                  |                  |   |     |   |    |        |                                                                                                                                          |
|----------|--------------------------------------------------------------------------------------------------|------------------|---|-----|---|----|--------|------------------------------------------------------------------------------------------------------------------------------------------|
|          |                                                                                                  |                  |   |     |   |    |        | response;metabolic process;regulation of biological process;response to stimulus;transport                                               |
| P09874   | Poly [ADP-ribose] polymerase 1 [OS=Homo sapiens]                                                 | PARP1            | 6 | 51  | 6 | 7  | 24.494 | cell death;cell differentiation;cell organization and biogenesis;metabolic process;regulation of biological process;response to stimulus |
| P08559   | Pyruvate dehydrogenase E1 component subunit alpha, somatic form, mitochondrial [OS=Homo sapiens] | PDHA1            | 4 | 39  | 4 | 11 | 18.638 | metabolic process;regulation of biological process                                                                                       |
| P11177   | Pyruvate dehydrogenase E1 component subunit beta, mitochondrial [OS=Homo sapiens]                | PDHB             | 6 | 69  | 6 | 22 | 30.202 | metabolic process;regulation of biological process                                                                                       |
| Q14554   | Protein disulfide-isomerase A5 [OS=Homo sapiens]                                                 | PDIA5            | 4 | 23  | 4 | 10 | 13.463 | cellular homeostasis;metabolic process;regulation of biological process;response to stimulus                                             |
| P16284   | Platelet endothelial cell adhesion molecule [OS=Homo sapiens]                                    | PECAM1           | 7 | 77  | 7 | 14 | 34.047 | cell organization and biogenesis;cellular component movement;regulation of biological process;response to stimulus;transport             |
| P12955   | xxa-Pro dipeptidase [OS=Homo sapiens]                                                            | PEPD             | 2 | 35  | 2 | 4  | 8.018  | metabolic process                                                                                                                        |
| P17858-1 | ATP-dependent 6-phosphofructokinase, liver type [OS=Homo sapiens]                                | PFKL             | 4 | 100 | 2 | 7  | 31.944 | cell organization and biogenesis;metabolic process;regulation of biological process;response to stimulus;transport                       |
| P35080-2 | Isoform IIb of Profilin-2 [OS=Homo sapiens]                                                      | PFN2             | 3 | 50  | 3 | 26 | 19.509 | cell organization and biogenesis;regulation of biological process                                                                        |
| P18669   | Phosphoglycerate mutase 1 [OS=Homo sapiens]                                                      | PGAM1; LOC643576 | 5 | 58  | 5 | 26 | 26.652 | metabolic process;regulation of biological process;transport                                                                             |
| Q96G03   | Phosphoglucumutase-2 [OS=Homo sapiens]                                                           | PGM2             | 3 | 36  | 2 | 7  | 14.683 | metabolic process;transport                                                                                                              |
| Q6PCE3   | glucose 1,6-bisphosphate synthase [OS=Homo sapiens]                                              | PGM2L1           | 6 | 51  | 6 | 10 | 18.964 | metabolic process                                                                                                                        |

|          |                                                                                          |        |   |    |   |    |        |                                                                                                                                                                                                                      |
|----------|------------------------------------------------------------------------------------------|--------|---|----|---|----|--------|----------------------------------------------------------------------------------------------------------------------------------------------------------------------------------------------------------------------|
| O60664-1 | Perilipin-3 [OS=Homo sapiens]                                                            | PLIN3  | 5 | 31 | 5 | 18 | 26.583 | transport                                                                                                                                                                                                            |
| Q02809   | Procollagen-lysine,2-oxoglutarate 5-dioxygenase 1 [OS=Homo sapiens]                      | PLOD1  | 2 | 10 | 2 | 4  | 9.28   | metabolic process;response to stimulus                                                                                                                                                                               |
| O60568   | Procollagen-lysine,2-oxoglutarate 5-dioxygenase 3 [OS=Homo sapiens]                      | PLOD3  | 2 | 32 | 2 | 4  | 11.701 | cell organization and biogenesis;metabolic process;response to stimulus                                                                                                                                              |
| P29590   | Protein PML [OS=Homo sapiens]                                                            | PML    | 6 | 27 | 6 | 10 | 26.218 | cell death;cell differentiation;cell organization and biogenesis;cellular component movement;cellular homeostasis;defense response;metabolic process;regulation of biological process;response to stimulus;transport |
| Q8IY17-1 | Neuropathy target esterase [OS=Homo sapiens]                                             | PNPLA6 | 4 | 47 | 4 | 5  | 18.904 | metabolic process                                                                                                                                                                                                    |
| Q9H488-1 | GDP-fucose protein O-fucosyltransferase 1 [OS=Homo sapiens]                              | POFUT1 | 2 | 40 | 2 | 7  | 9.933  | metabolic process;regulation of biological process;response to stimulus                                                                                                                                              |
| P36873-1 | serine/threonine-protein phosphatase PP1-gamma catalytic subunit [OS=Homo sapiens]       | PPP1CC | 4 | 35 | 2 | 18 | 20.548 | cell differentiation;cell division;cell organization and biogenesis;metabolic process;regulation of biological process;response to stimulus                                                                          |
| P62714   | serine/threonine-protein phosphatase 2A catalytic subunit beta isoform [OS=Homo sapiens] | PPP2CB | 4 | 36 | 4 | 18 | 19.018 | cell organization and biogenesis;metabolic process;regulation of biological process;response to stimulus                                                                                                             |
| O60831   | PRA1 family protein 2 [OS=Homo sapiens]                                                  | PRAF2  | 2 | 21 | 2 | 12 | 10.283 | transport                                                                                                                                                                                                            |
| P30048   | Thioredoxin-dependent peroxide reductase, mitochondrial [OS=Homo sapiens]                | PRDX3  | 2 | 29 | 2 | 10 | 10.072 | cell death;cell differentiation;cell organization and biogenesis;cellular homeostasis;metabolic process;regulation of biological process;response to stimulus                                                        |
| P30044-1 | Peroxisome oxidin-5, mitochondrial [OS=Homo sapiens]                                     | PRDX5  | 6 | 76 | 6 | 36 | 23.842 | cell death;cellular homeostasis;defense response;metabolic                                                                                                                                                           |

|          |                                                                   |        |    |     |    |    |        |                                                                                                                                         |
|----------|-------------------------------------------------------------------|--------|----|-----|----|----|--------|-----------------------------------------------------------------------------------------------------------------------------------------|
|          |                                                                   |        |    |     |    |    |        | process;regulation of biological process;response to stimulus                                                                           |
| O43172-1 | U4/U6 small nuclear ribonucleoprotein Prp4 [OS=Homo sapiens]      | PRPF4  | 2  | 12  | 2  | 6  | 9.526  | metabolic process                                                                                                                       |
| Q6P2Q9   | Pre-mRNA-processing-splicing factor 8 [OS=Homo sapiens]           | PRPF8  | 9  | 88  | 9  | 4  | 39.331 | cell organization and biogenesis;metabolic process;response to stimulus                                                                 |
| P25789   | Proteasome subunit alpha type-4 [OS=Homo sapiens]                 | PSMA4  | 4  | 44  | 4  | 18 | 16.736 | metabolic process;regulation of biological process;response to stimulus;transport                                                       |
| P28070   | Proteasome subunit beta type-4 [OS=Homo sapiens]                  | PSMB4  | 3  | 27  | 3  | 15 | 10.841 | metabolic process;regulation of biological process;response to stimulus;transport                                                       |
| P62191   | 26S proteasome regulatory subunit 4 [OS=Homo sapiens]             | PSMC1  | 6  | 80  | 5  | 19 | 27.305 | metabolic process;regulation of biological process;response to stimulus;transport                                                       |
| P17980   | 26S proteasome regulatory subunit 6A [OS=Homo sapiens]            | PSMC3  | 10 | 102 | 10 | 28 | 41.944 | metabolic process;regulation of biological process;response to stimulus;transport                                                       |
| P43686   | 26S proteasome regulatory subunit 6B [OS=Homo sapiens]            | PSMC4  | 6  | 48  | 6  | 17 | 25.599 | metabolic process;regulation of biological process;response to stimulus;transport                                                       |
| P62333   | 26S proteasome regulatory subunit 10B [OS=Homo sapiens]           | PSMC6  | 3  | 38  | 3  | 10 | 14.904 | cell organization and biogenesis;metabolic process;regulation of biological process;response to stimulus;transport                      |
| O00231   | 26S proteasome non-ATPase regulatory subunit 11 [OS=Homo sapiens] | PSMD11 | 5  | 33  | 5  | 15 | 19.531 | cell differentiation;cell organization and biogenesis;metabolic process;regulation of biological process;response to stimulus;transport |
| Q9UNM6   | 26S proteasome non-ATPase regulatory subunit 13 [OS=Homo sapiens] | PSMD13 | 4  | 34  | 4  | 9  | 11.47  | cell organization and biogenesis;metabolic process;regulation of biological process;response to stimulus;transport                      |
| O00487   | 26S proteasome non-ATPase regulatory subunit 14 [OS=Homo sapiens] | PSMD14 | 4  | 24  | 4  | 20 | 11.895 | metabolic process;regulation of biological process;response to stimulus;transport                                                       |

|          |                                                                  |                 |   |    |   |    |        |                                                                                                                       |
|----------|------------------------------------------------------------------|-----------------|---|----|---|----|--------|-----------------------------------------------------------------------------------------------------------------------|
| Q13200   | 26S proteasome non-ATPase regulatory subunit 2 [OS=Homo sapiens] | PSMD2           | 8 | 67 | 8 | 10 | 39.613 | metabolic process;regulation of biological process;response to stimulus;transport                                     |
| P55036-1 | 26S proteasome non-ATPase regulatory subunit 4 [OS=Homo sapiens] | PSMD4           | 3 | 22 | 3 | 13 | 8.88   | cell organization and biogenesis;metabolic process;regulation of biological process;response to stimulus;transport    |
| Q16401   | 26S proteasome non-ATPase regulatory subunit 5 [OS=Homo sapiens] | PSMD5           | 2 | 15 | 2 | 5  | 6.049  | cell organization and biogenesis;metabolic process;regulation of biological process;response to stimulus;transport    |
| Q15008   | 26S proteasome non-ATPase regulatory subunit 6 [OS=Homo sapiens] | PSMD6           | 3 | 18 | 3 | 9  | 10.342 | metabolic process;regulation of biological process;response to stimulus;transport                                     |
| Q92530   | proteasome inhibitor PI31 subunit [OS=Homo sapiens]              | PSMF1           | 3 | 12 | 3 | 15 | 9.965  | metabolic process;regulation of biological process;response to stimulus;transport                                     |
| Q6NZI2-1 | caveolae-associated protein 1 [OS=Homo sapiens]                  | PTRF;<br>CAVIN1 | 4 | 28 | 4 | 16 | 16.132 | metabolic process;regulation of biological process                                                                    |
| Q9Y3E5   | Peptidyl-tRNA hydrolase 2, mitochondrial [OS=Homo sapiens]       | PTRH2           | 2 | 27 | 2 | 19 | 11.23  | cell death;regulation of biological process                                                                           |
| Q9UHX1-1 | poly(U)-binding-splicing factor PUF60 [OS=Homo sapiens]          | PUF60           | 2 | 17 | 2 | 8  | 8.244  | cell death;cellular homeostasis;metabolic process;regulation of biological process                                    |
| P47897   | glutamine-tRNA ligase [OS=Homo sapiens]                          | QARS            | 7 | 60 | 7 | 12 | 25.47  | metabolic process;regulation of biological process                                                                    |
| P61026   | ras-related protein rab-10 [OS=Homo sapiens]                     | RAB10           | 3 | 72 | 1 | 17 | 19.93  | cell differentiation;cell organization and biogenesis;regulation of biological process;response to stimulus;transport |
| P61019-1 | Ras-related protein Rab-2A [OS=Homo sapiens]                     | RAB2A           | 4 | 55 | 4 | 25 | 21.786 | cell organization and biogenesis;metabolic process;regulation of biological process;response to stimulus;transport    |

|          |                                                      |                          |   |    |   |    |        |                                                                                                                           |
|----------|------------------------------------------------------|--------------------------|---|----|---|----|--------|---------------------------------------------------------------------------------------------------------------------------|
| P51148   | Ras-related protein Rab-5C<br>[OS=Homo sapiens]      | RAB5C                    | 5 | 80 | 4 | 35 | 30.094 | regulation of biological process;response to stimulus;transport                                                           |
| Q92878   | DNA repair protein Rad50<br>[OS=Homo sapiens]        | RAD50                    | 5 | 40 | 5 | 4  | 14.101 | cell organization and biogenesis;metabolic process;regulation of biological process;response to stimulus                  |
| P11233   | Ras-related protein Ral-A<br>[OS=Homo sapiens]       | RALA                     | 3 | 33 | 3 | 11 | 13.875 | cell division;cell organization and biogenesis;regulation of biological process;response to stimulus;transport            |
| P46060   | Ran GTPase-activating protein 1<br>[OS=Homo sapiens] | RANGAP 1                 | 2 | 29 | 2 | 4  | 10.147 | cell organization and biogenesis;metabolic process;regulation of biological process;response to stimulus                  |
| P61225   | ras-related protein Rap-2b<br>[OS=Homo sapiens]      | RAP2B                    | 2 | 41 | 2 | 13 | 10.78  | cell organization and biogenesis;regulation of biological process;response to stimulus;transport                          |
| Q96PK6-1 | RNA-binding protein 14<br>[OS=Homo sapiens]          | RBM14;<br>RBM14-<br>RBM4 | 2 | 21 | 2 | 5  | 6.87   | cell organization and biogenesis;defense response;metabolic process;regulation of biological process;response to stimulus |
| P84098   | 60S ribosomal protein L19<br>[OS=Homo sapiens]       | RPL19                    | 2 | 28 | 2 | 13 | 9.714  | cell organization and biogenesis;metabolic process;transport                                                              |
| P46778   | 60S ribosomal protein L21<br>[OS=Homo sapiens]       | RPL21                    | 3 | 32 | 3 | 28 | 15.186 | cell organization and biogenesis;metabolic process;transport                                                              |
| P62910   | 60S ribosomal protein L32<br>[OS=Homo sapiens]       | RPL32                    | 5 | 39 | 5 | 42 | 19.528 | cell organization and biogenesis;metabolic process;response to stimulus;transport                                         |
| P18077   | 60S ribosomal protein L35a<br>[OS=Homo sapiens]      | RPL35A                   | 3 | 17 | 3 | 14 | 13.336 | cell organization and biogenesis;metabolic process;transport                                                              |
| P63173   | 60s ribosomal protein l38<br>[OS=Homo sapiens]       | RPL38                    | 4 | 29 | 4 | 50 | 14.067 | cell organization and biogenesis;metabolic process;regulation of biological process;transport                             |

|        |                                                                               |               |   |     |   |    |        |                                                                                                                                                                             |
|--------|-------------------------------------------------------------------------------|---------------|---|-----|---|----|--------|-----------------------------------------------------------------------------------------------------------------------------------------------------------------------------|
| Q9NQG5 | regulation of nuclear pre-mRNA domain-containing protein 1B [OS=Homo sapiens] | RPRD1B        | 3 | 36  | 3 | 14 | 13.411 | metabolic process;regulation of biological process                                                                                                                          |
| P08708 | 40S ribosomal protein S17 [OS=Homo sapiens]                                   | RPS17; RPS17L | 3 | 27  | 3 | 40 | 10.947 | cell organization and biogenesis;metabolic process;transport                                                                                                                |
| P62979 | Ubiquitin-40S ribosomal protein S27a [OS=Homo sapiens]                        | RPS27A        | 9 | 550 | 2 | 60 | 71.201 | cell communication;cell organization and biogenesis;cellular homeostasis;defense response;metabolic process;regulation of biological process;response to stimulus;transport |
| P46782 | 40S ribosomal protein S5 [OS=Homo sapiens]                                    | RPS5          | 4 | 63  | 4 | 27 | 32.472 | cell organization and biogenesis;metabolic process;regulation of biological process;transport                                                                               |
| O76021 | Ribosomal L1 domain-containing protein 1 [OS=Homo sapiens]                    | RSL1D1        | 4 | 28  | 4 | 11 | 13.41  | cell differentiation;metabolic process;regulation of biological process                                                                                                     |
| Q9Y265 | RuvB-like 1 [OS=Homo sapiens]                                                 | RUVBL1        | 4 | 35  | 4 | 13 | 24.299 | cell division;cell organization and biogenesis;metabolic process;regulation of biological process;response to stimulus                                                      |
| P60903 | Protein S100-A10 [OS=Homo sapiens]                                            | S100A10       | 2 | 35  | 2 | 28 | 10.82  | cell organization and biogenesis;regulation of biological process;response to stimulus                                                                                      |
| O75396 | Vesicle-trafficking protein SEC22b [OS=Homo sapiens]                          | SEC22B        | 3 | 38  | 3 | 21 | 17.174 | cell organization and biogenesis;regulation of biological process;transport                                                                                                 |
| Q15436 | protein transport protein Sec23A [OS=Homo sapiens]                            | SEC23A        | 9 | 109 | 9 | 16 | 46.715 | cell organization and biogenesis;transport                                                                                                                                  |
| P53992 | Protein transport protein sec24c [OS=Homo sapiens]                            | SEC24C        | 5 | 29  | 5 | 6  | 20.303 | cell organization and biogenesis;regulation of biological process;transport                                                                                                 |
| P61619 | Protein transport protein Sec61 subunit alpha isoform 1 [OS=Homo sapiens]     | SEC61A1       | 3 | 39  | 3 | 5  | 14.945 | cell growth;cell organization and biogenesis;response to stimulus;transport                                                                                                 |

|          |                                                                       |             |   |    |   |    |        |                                                                                                                                                |
|----------|-----------------------------------------------------------------------|-------------|---|----|---|----|--------|------------------------------------------------------------------------------------------------------------------------------------------------|
| Q9UHD8-1 | Septin-9 [OS=Homo sapiens]                                            | SEPT9       | 5 | 55 | 4 | 9  | 24.754 | cell division;cell organization and biogenesis;regulation of biological process                                                                |
| O75533-1 | splicing factor 3B subunit 1 [OS=Homo sapiens]                        | SF3B1       | 5 | 58 | 5 | 4  | 20.06  | cell organization and biogenesis;metabolic process;regulation of biological process;response to stimulus                                       |
| Q15393-1 | Splicing factor 3B subunit 3 [OS=Homo sapiens]                        | SF3B3       | 2 | 27 | 2 | 2  | 10.51  | cell organization and biogenesis;metabolic process;regulation of biological process                                                            |
| P23246-1 | splicing factor, proline- and glutamine-rich [OS=Homo sapiens]        | SFPQ        | 5 | 33 | 5 | 9  | 22.56  | cell organization and biogenesis;defense response;metabolic process;regulation of biological process;response to stimulus                      |
| Q6NUK1   | Calcium-binding mitochondrial carrier protein SCA1 [OS=Homo sapiens]  | SLC25A2     | 4 | 32 | 4 | 9  | 16.206 | regulation of biological process;response to stimulus;transport                                                                                |
| O95347-1 | structural maintenance of chromosomes protein 2 [OS=Homo sapiens]     | SMC2        | 2 | 16 | 2 | 2  | 6.309  | cell division;cell organization and biogenesis;metabolic process;regulation of biological process                                              |
| O75643-1 | U5 small nuclear ribonucleoprotein 200 kDa helicase [OS=Homo sapiens] | SNRNP200    | 8 | 94 | 8 | 5  | 40.716 | cell differentiation;cell organization and biogenesis;metabolic process                                                                        |
| Q13596   | Sorting nexin-1 [OS=Homo sapiens]                                     | SNX1        | 2 | 26 | 1 | 3  | 10.142 | cell organization and biogenesis;metabolic process;regulation of biological process;transport                                                  |
| Q9UNH7-1 | Sorting nexin-6 [OS=Homo sapiens]                                     | SNX6        | 3 | 17 | 3 | 9  | 11.681 | cell organization and biogenesis;regulation of biological process;transport                                                                    |
| Q13813   | Spectrin alpha chain, non-erythrocytic 1 [OS=Homo sapiens]            | SPTAN1      | 7 | 44 | 7 | 4  | 32.09  | cell organization and biogenesis;cellular component movement;metabolic process;regulation of biological process;response to stimulus;transport |
| Q9Y6N5   | Sulfide:quinone oxidoreductase, mitochondrial [OS=Homo sapiens]       | SQRDL; SQOR | 6 | 61 | 6 | 14 | 29.073 | metabolic process                                                                                                                              |



|          |                                                                                                |          |   |     |   |    |        |                                                                                                          |
|----------|------------------------------------------------------------------------------------------------|----------|---|-----|---|----|--------|----------------------------------------------------------------------------------------------------------|
| P19623   | spermidine synthase [OS=Homo sapiens]                                                          | SRM      | 5 | 60  | 5 | 20 | 19.628 | metabolic process                                                                                        |
| P37108   | Signal recognition particle 14 kDa protein [OS=Homo sapiens]                                   | SRP14    | 4 | 24  | 4 | 40 | 31.032 | cell organization and biogenesis;response to stimulus;transport                                          |
| Q9UHB9   | Signal recognition particle subunit SRP68 [OS=Homo sapiens]                                    | SRP68    | 3 | 63  | 3 | 6  | 15.869 | cell organization and biogenesis;response to stimulus;transport                                          |
| Q08945   | FACT complex subunit SSRP1 [OS=Homo sapiens]                                                   | SSRP1    | 4 | 41  | 4 | 7  | 22.872 | metabolic process;regulation of biological process;response to stimulus                                  |
| P31948   | stress-induced-phosphoprotein 1 [OS=Homo sapiens]                                              | STIP1    | 6 | 61  | 6 | 14 | 27.677 | response to stimulus                                                                                     |
| Q8TCJ2   | Dolichyl-diphosphooligosaccharide--protein glycosyltransferase subunit STT3B [OS=Homo sapiens] | STT3B    | 4 | 36  | 4 | 5  | 15.307 | metabolic process;response to stimulus                                                                   |
| P53597   | Succinate--CoA ligase [ADP/GDP-forming] subunit alpha, mitochondrial [OS=Homo sapiens]         | SUCLG1   | 2 | 36  | 2 | 9  | 9.71   | metabolic process                                                                                        |
| Q96199-1 | Succinate--CoA ligase [GDP-forming] subunit beta, mitochondrial [OS=Homo sapiens]              | SUCLG2   | 3 | 22  | 3 | 11 | 14.595 | metabolic process                                                                                        |
| Q9Y5B9   | FACT complex subunit SPT16 [OS=Homo sapiens]                                                   | SUPT16 H | 7 | 68  | 7 | 8  | 28.818 | cell organization and biogenesis;metabolic process;regulation of biological process;response to stimulus |
| Q9UH65   | Switch-associated protein 70 [OS=Homo sapiens]                                                 | SWAP70   | 2 | 31  | 2 | 3  | 8.855  | cell organization and biogenesis;cellular homeostasis;metabolic process;regulation of biological process |
| O60506   | Heterogeneous nuclear ribonucleoprotein Q [OS=Homo sapiens]                                    | SYNCRIP  | 8 | 101 | 5 | 15 | 31.724 | cell differentiation;metabolic process;regulation of biological process;response to stimulus             |
| P26639-1 | Threonine--tRNA ligase, cytoplasmic [OS=Homo sapiens]                                          | TARS     | 8 | 71  | 8 | 14 | 35.619 | metabolic process                                                                                        |
| P07996   | thrombospondin-1 [OS=Homo sapiens]                                                             | THBS1    | 4 | 22  | 4 | 5  | 12.22  | cell organization and biogenesis;cellular component                                                      |

|          |                                                                          |        |    |      |   |    |         |                                                                                                                                               |
|----------|--------------------------------------------------------------------------|--------|----|------|---|----|---------|-----------------------------------------------------------------------------------------------------------------------------------------------|
|          |                                                                          |        |    |      |   |    |         | movement;defense<br>response;metabolic<br>process;regulation of biological<br>process;response to<br>stimulus;transport                       |
| Q92544   | Transmembrane 9 superfamily<br>member 4 [OS=Homo sapiens]                | TM9SF4 | 2  | 16   | 2 | 4  | 7.315   | cell organization and<br>biogenesis;cellular<br>homeostasis;regulation of<br>biological process;response to<br>stimulus;transport             |
| Q13445   | Transmembrane emp24 domain-<br>containing protein 1 [OS=Homo<br>sapiens] | TMED1  | 2  | 14   | 2 | 12 | 13.983  | cell communication;regulation of<br>biological process;response to<br>stimulus;transport                                                      |
| Q92973-1 | transportin-1 [OS=Homo sapiens]                                          | TNPO1  | 9  | 71   | 9 | 12 | 38.835  | cellular component<br>movement;regulation of biological<br>process;transport                                                                  |
| P11387   | DNA topoisomerase 1<br>[OS=Homo sapiens]                                 | TOP1   | 6  | 92   | 6 | 8  | 31.84   | cell death;cell division;cell<br>organization and<br>biogenesis;metabolic<br>process;regulation of biological<br>process;response to stimulus |
| Q14258   | E3 ubiquitin/ISG15 ligase<br>TRIM25 [OS=Homo sapiens]                    | TRIM25 | 5  | 48   | 5 | 9  | 25.203  | defense response;metabolic<br>process;regulation of biological<br>process;response to stimulus                                                |
| Q13263   | Transcription intermediary factor<br>1-beta [OS=Homo sapiens]            | TRIM28 | 8  | 83   | 8 | 15 | 34.512  | cell organization and<br>biogenesis;defense<br>response;metabolic<br>process;regulation of biological<br>process;response to stimulus         |
| Q13509   | tubulin beta-3 chain [OS=Homo<br>sapiens]                                | TUBB3  | 19 | 2010 | 2 | 45 | 264.623 | cell organization and<br>biogenesis;cellular component<br>movement                                                                            |
| P04350   | Tubulin beta-4A chain [OS=Homo<br>sapiens]                               | TUBB4A | 26 | 2013 | 3 | 69 | 293.924 | cell organization and<br>biogenesis;regulation of<br>biological process                                                                       |
| Q12792-2 | Twinfilin-1 [OS=Homo sapiens]                                            | TWF1   | 3  | 27   | 3 | 11 | 12.988  | cell organization and<br>biogenesis;regulation of<br>biological process                                                                       |
| Q6IBS0   | Twinfilin-2 [OS=Homo sapiens]                                            | TWF2   | 2  | 36   | 2 | 10 | 17.497  | cell organization and<br>biogenesis;regulation of<br>biological process;response to<br>stimulus                                               |

|          |                                                                                     |                        |    |     |    |    |        |                                                                                                                               |
|----------|-------------------------------------------------------------------------------------|------------------------|----|-----|----|----|--------|-------------------------------------------------------------------------------------------------------------------------------|
| Q16222-1 | UDP-N-acetylhexosamine pyrophosphorylase [OS=Homo sapiens]                          | UAP1                   | 3  | 60  | 3  | 7  | 16.691 | metabolic process                                                                                                             |
| Q9UBT2   | SUMO-activating enzyme subunit 2 [OS=Homo sapiens]                                  | UBA2                   | 6  | 46  | 6  | 12 | 25.263 | metabolic process;regulation of biological process                                                                            |
| Q13404   | Ubiquitin-conjugating enzyme E2 variant 1 [OS=Homo sapiens]                         | UBE2V1; TMEM189-UBE2V1 | 4  | 20  | 4  | 27 | 12.783 | cell differentiation;metabolic process;regulation of biological process;response to stimulus                                  |
| Q9H3U1   | Protein unc-45 homolog A [OS=Homo sapiens]                                          | UNC45A                 | 5  | 28  | 5  | 7  | 23.91  | cell differentiation;development;metabolic process                                                                            |
| P22695   | Cytochrome b-c1 complex subunit 2, mitochondrial [OS=Homo sapiens]                  | UQCRC2                 | 9  | 96  | 9  | 26 | 47.904 | metabolic process;transport                                                                                                   |
| O60763-1 | General vesicular transport factor p115 [OS=Homo sapiens]                           | USO1                   | 6  | 69  | 6  | 9  | 25.172 | cell organization and biogenesis;metabolic process;transport                                                                  |
| Q14694   | Ubiquitin carboxyl-terminal hydrolase 10 [OS=Homo sapiens]                          | USP10                  | 2  | 20  | 2  | 3  | 8.064  | metabolic process;regulation of biological process;response to stimulus                                                       |
| P45974-1 | Ubiquitin carboxyl-terminal hydrolase 5 [OS=Homo sapiens]                           | USP5                   | 8  | 51  | 8  | 14 | 33.21  | metabolic process;regulation of biological process                                                                            |
| Q93008-1 | Isoform 2 of Probable ubiquitin carboxyl-terminal hydrolase FAF-X [OS=Homo sapiens] | USP9X                  | 4  | 18  | 4  | 2  | 11.548 | cell division;cell growth;cellular component movement;metabolic process;regulation of biological process;response to stimulus |
| P26640   | Valine--tRNA ligase [OS=Homo sapiens]                                               | VARS; VARS2            | 6  | 24  | 6  | 7  | 20.586 | metabolic process;regulation of biological process                                                                            |
| P18206   | Vinculin [OS=Homo sapiens]                                                          | VCL                    | 13 | 111 | 13 | 14 | 61.836 | cell growth;cell organization and biogenesis;cellular component movement;regulation of biological process;transport           |
| Q9Y277   | Voltage-dependent anion-selective channel protein 3 [OS=Homo sapiens]               | VDAC3                  | 3  | 24  | 2  | 12 | 15.252 | cell communication;defense response;regulation of biological process;response to stimulus;transport                           |
| O75436-1 | Vacuolar protein sorting-associated protein 26A [OS=Homo sapiens]                   | VPS26A                 | 2  | 15  | 2  | 9  | 7.735  | regulation of biological process;response to stimulus;transport                                                               |

|        |                                                                  |       |    |     |    |    |        |                                                                                                                    |
|--------|------------------------------------------------------------------|-------|----|-----|----|----|--------|--------------------------------------------------------------------------------------------------------------------|
| Q96QK1 | Vacuolar protein sorting-associated protein 35 [OS=Homo sapiens] | VPS35 | 8  | 83  | 8  | 10 | 30.047 | cell organization and biogenesis;regulation of biological process;response to stimulus;transport                   |
| P23381 | Tryptophan--tRNA ligase, cytoplasmic [OS=Homo sapiens]           | WARS  | 3  | 28  | 3  | 10 | 11.966 | metabolic process;regulation of biological process                                                                 |
| O14980 | Exportin-1 [OS=Homo sapiens]                                     | XPO1  | 10 | 103 | 10 | 11 | 46.747 | cell organization and biogenesis;regulation of biological process;response to stimulus;transport                   |
| Q9UIA9 | exportin-7 [OS=Homo sapiens]                                     | XPO7  | 4  | 40  | 4  | 4  | 14.299 | transport                                                                                                          |
| O43592 | Exportin-T [OS=Homo sapiens]                                     | XPOT  | 3  | 20  | 3  | 4  | 11.284 | transport                                                                                                          |
| P31946 | 14-3-3 protein beta/alpha [OS=Homo sapiens]                      | YWHAB | 5  | 163 | 2  | 27 | 21.855 | cell organization and biogenesis;metabolic process;regulation of biological process;response to stimulus;transport |
| Q04917 | 14-3-3 protein eta [OS=Homo sapiens]                             | YWHAH | 7  | 190 | 5  | 25 | 41.44  | cell organization and biogenesis;metabolic process;regulation of biological process;response to stimulus;transport |

**Table S2:** List of 394 proteins modified by 2-ClHDyA in EA.hy926 cells including those also modified by HDyA

| Accession | Description                                                                  | Gene Symbol | # Peptides | # PSMs | # Unique Peptides | Coverage [%] | Sum PEP Score | Biological Process                                                                                                 |
|-----------|------------------------------------------------------------------------------|-------------|------------|--------|-------------------|--------------|---------------|--------------------------------------------------------------------------------------------------------------------|
| P61221    | ATP-binding cassette sub-family E member 1 [OS=Homo sapiens]                 | ABCE1       | 6          | 44     | 6                 | 13           | 21.202        | cell organization and biogenesis;metabolic process;regulation of biological process;transport                      |
| P09110-1  | 3-ketoacyl-CoA thiolase, peroxisomal [OS=Homo sapiens]                       | ACAA1       | 10         | 131    | 10                | 38           | 60.632        | metabolic process;transport                                                                                        |
| P42765    | 3-ketoacyl-CoA thiolase, mitochondrial [OS=Homo sapiens]                     | ACAA2       | 6          | 42     | 6                 | 28           | 22.725        | cell organization and biogenesis;metabolic process;regulation of biological process;response to stimulus           |
| Q13085-1  | Acetyl-CoA carboxylase 1 [OS=Homo sapiens]                                   | ACACA       | 6          | 41     | 6                 | 3            | 24.463        | cell organization and biogenesis;metabolic process;regulation of biological process;response to stimulus;transport |
| P24752    | Acetyl-CoA acetyltransferase, mitochondrial [OS=Homo sapiens]                | ACAT1       | 13         | 130    | 13                | 43           | 61.3          | cell organization and biogenesis;metabolic process;response to stimulus                                            |
| Q99798    | Aconitate hydratase, mitochondrial [OS=Homo sapiens]                         | ACO2        | 5          | 18     | 5                 | 10           | 17.453        | metabolic process;response to stimulus                                                                             |
| O00154-4  | Isoform 4 of Cytosolic acyl coenzyme A thioester hydrolase [OS=Homo sapiens] | ACOT7       | 7          | 102    | 7                 | 29           | 32.112        | metabolic process                                                                                                  |
| Q9Y305-1  | Acyl-coenzyme A thioesterase 9, mitochondrial [OS=Homo sapiens]              | ACOT9       | 4          | 30     | 4                 | 10           | 14.675        | metabolic process                                                                                                  |
| O95573    | long-chain-fatty-acid--CoA ligase 3 [OS=Homo sapiens]                        | ACSL3       | 5          | 46     | 3                 | 10           | 21.683        | cell organization and biogenesis;metabolic process;regulation of biological process;response to stimulus;transport |
| O60488-1  | Long-chain-fatty-acid--CoA ligase 4 [OS=Homo sapiens]                        | ACSL4       | 6          | 44     | 4                 | 12           | 24.194        | cell differentiation;metabolic process;regulation of biological                                                    |

|          |                                                                                         |         |    |     |    |    |         |                                                                                                                                                                              |
|----------|-----------------------------------------------------------------------------------------|---------|----|-----|----|----|---------|------------------------------------------------------------------------------------------------------------------------------------------------------------------------------|
|          |                                                                                         |         |    |     |    |    |         | process;response to stimulus;transport                                                                                                                                       |
| P12814-1 | Alpha-actinin-1 [OS=Homo sapiens]                                                       | ACTN1   | 30 | 600 | 18 | 42 | 171.711 | cell differentiation;cell organization and biogenesis;regulation of biological process;transport                                                                             |
| O43707   | Alpha-actinin-4 [OS=Homo sapiens]                                                       | ACTN4   | 27 | 647 | 15 | 38 | 167.997 | cell organization and biogenesis;cellular component movement;regulation of biological process;response to stimulus;transport                                                 |
| P61163   | Alpha-centractin [OS=Homo sapiens]                                                      | ACTR1 A | 5  | 62  | 5  | 24 | 26.894  | regulation of biological process;transport                                                                                                                                   |
| P61160-1 | Actin-related protein 2 [OS=Homo sapiens]                                               | ACTR2   | 7  | 79  | 7  | 22 | 39.621  | cell division;cell organization and biogenesis;cellular component movement;regulation of biological process;response to stimulus;transport                                   |
| P61158   | actin-related protein 3 [OS=Homo sapiens]                                               | ACTR3   | 8  | 81  | 8  | 29 | 45.111  | cell division;cell organization and biogenesis;cellular component movement;regulation of biological process;response to stimulus                                             |
| P37023   | Serine/threonine-protein kinase receptor R3 [OS=Homo sapiens]                           | ACVRL 1 | 2  | 16  | 2  | 6  | 8.395   | cell differentiation;cell organization and biogenesis;cell proliferation;cellular component movement;metabolic process;regulation of biological process;response to stimulus |
| P30520   | adenylosuccinate synthetase isozyme 2 [OS=Homo sapiens]                                 | ADSS    | 4  | 54  | 4  | 13 | 26.475  | metabolic process;response to stimulus                                                                                                                                       |
| O00116   | Alkyldihydroxyacetonephosphate synthase, peroxisomal [OS=Homo sapiens]                  | AGPS    | 3  | 47  | 3  | 6  | 16.795  | metabolic process                                                                                                                                                            |
| Q13155   | aminoacyl tRNA synthase complex-interacting multifunctional protein 2 [OS=Homo sapiens] | AIMP2   | 3  | 21  | 3  | 17 | 12.218  | cell death;cell differentiation;cell organization and biogenesis;development;metabolic process;regulation of biological process                                              |
| P00568   | Adenylate kinase isoenzyme 1 [OS=Homo sapiens]                                          | AK1     | 2  | 31  | 2  | 13 | 7.818   | metabolic process                                                                                                                                                            |
| P15121   | aldose reductase [OS=Homo sapiens]                                                      | AKR1B1  | 5  | 92  | 4  | 11 | 25.171  | metabolic process;regulation of biological process;response to stimulus                                                                                                      |

|          |                                                                |           |    |     |    |    |        |                                                                                                                                                                                      |
|----------|----------------------------------------------------------------|-----------|----|-----|----|----|--------|--------------------------------------------------------------------------------------------------------------------------------------------------------------------------------------|
| P54886   | delta-1-pyrroline-5-carboxylate synthase [OS=Homo sapiens]     | ALDH18 A1 | 7  | 106 | 7  | 10 | 38.77  | metabolic process                                                                                                                                                                    |
| P00352   | Retinal dehydrogenase 1 [OS=Homo sapiens]                      | ALDH1 A1  | 15 | 237 | 14 | 36 | 85.926 | metabolic process;regulation of biological process                                                                                                                                   |
| P49419   | Alpha-aminoadipic semialdehyde dehydrogenase [OS=Homo sapiens] | ALDH7 A1  | 5  | 25  | 5  | 15 | 17.78  | metabolic process                                                                                                                                                                    |
| P04083   | annexin A1 [OS=Homo sapiens]                                   | ANXA1     | 10 | 69  | 10 | 37 | 41.926 | cell differentiation;cell organization and biogenesis;cellular component movement;defense response;metabolic process;regulation of biological process;response to stimulus;transport |
| P08133-1 | annexin A6 [OS=Homo sapiens]                                   | ANXA6     | 4  | 31  | 4  | 7  | 13.608 | cell organization and biogenesis;cellular homeostasis;regulation of biological process;response to stimulus;transport                                                                |
| P20073-1 | Annexin A7 [OS=Homo sapiens]                                   | ANXA7     | 4  | 48  | 4  | 10 | 20.365 | cell differentiation;cell organization and biogenesis;cell proliferation;cellular homeostasis;metabolic process;regulation of biological process;response to stimulus                |
| Q9BXS5-1 | AP-1 complex subunit mu-1 [OS=Homo sapiens]                    | AP1M1     | 5  | 20  | 5  | 17 | 15.492 | cell organization and biogenesis;regulation of biological process;transport                                                                                                          |
| O95782   | AP-2 complex subunit alpha-1 [OS=Homo sapiens]                 | AP2A1     | 8  | 94  | 3  | 11 | 31.456 | cell organization and biogenesis;cellular component movement;metabolic process;regulation of biological process;response to stimulus;transport                                       |
| O94973   | AP-2 complex subunit alpha-2 [OS=Homo sapiens]                 | AP2A2     | 9  | 71  | 4  | 13 | 30.102 | cell organization and biogenesis;cellular component movement;metabolic process;regulation of biological process;response to stimulus;transport                                       |
| P63010-1 | AP-2 complex subunit beta [OS=Homo sapiens]                    | AP2B1     | 7  | 101 | 7  | 8  | 30.303 | cell organization and biogenesis;cellular component                                                                                                                                  |

|          |                                                          |           |   |     |   |    |        |                                                                                                                                                                            |
|----------|----------------------------------------------------------|-----------|---|-----|---|----|--------|----------------------------------------------------------------------------------------------------------------------------------------------------------------------------|
|          |                                                          |           |   |     |   |    |        | movement;metabolic process;regulation of biological process;response to stimulus;transport                                                                                 |
| Q96CW1   | AP-2 complex subunit mu [OS=Homo sapiens]                | AP2M1     | 5 | 49  | 5 | 14 | 26.689 | cell organization and biogenesis;cellular component movement;metabolic process;regulation of biological process;response to stimulus;transport                             |
| O00203-1 | AP-3 complex subunit beta-1 [OS=Homo sapiens]            | AP3B1     | 2 | 22  | 2 | 3  | 7.489  | cell organization and biogenesis;cellular component movement;coagulation;regulation of biological process;transport                                                        |
| Q9Y2T2   | ap-3 complex subunit mu-1 [OS=Homo sapiens]              | AP3M1     | 2 | 23  | 2 | 6  | 7.702  | cellular component movement;transport                                                                                                                                      |
| P48444   | Coatomer subunit delta [OS=Homo sapiens]                 | ARCN1     | 6 | 125 | 6 | 11 | 32.866 | response to stimulus;transport                                                                                                                                             |
| P61204   | ADP-ribosylation factor 3 [OS=Homo sapiens]              | ARF3      | 7 | 86  | 4 | 51 | 42.394 | metabolic process;regulation of biological process;response to stimulus;transport                                                                                          |
| P18085   | ADP-ribosylation factor 4 [OS=Homo sapiens]              | ARF4      | 6 | 49  | 3 | 41 | 27.618 | cellular component movement;metabolic process;regulation of biological process;response to stimulus;transport                                                              |
| P62330   | ADP-ribosylation factor 6 [OS=Homo sapiens]              | ARF6      | 2 | 37  | 2 | 12 | 10.531 | cell death;cell differentiation;cell division;cell organization and biogenesis;cellular component movement;regulation of biological process;response to stimulus;transport |
| Q8N392-1 | Rho GTPase-activating protein 18 [OS=Homo sapiens]       | ARHGA P18 | 3 | 17  | 3 | 5  | 11.019 | cell organization and biogenesis;regulation of biological process;response to stimulus                                                                                     |
| P40616   | ADP-ribosylation factor-like protein 1 [OS=Homo sapiens] | ARL1      | 3 | 46  | 3 | 19 | 16.567 | cell organization and biogenesis;metabolic process;regulation of biological process;response to stimulus;transport                                                         |



|          |                                                                                     |                 |    |     |    |    |         |                                                                                                                                                                                |
|----------|-------------------------------------------------------------------------------------|-----------------|----|-----|----|----|---------|--------------------------------------------------------------------------------------------------------------------------------------------------------------------------------|
| O15143   | Actin-related protein 2/3 complex subunit 1B [OS=Homo sapiens]                      | ARPC1 B         | 3  | 45  | 3  | 11 | 16.043  | cell organization and biogenesis;cellular component movement;regulation of biological process;response to stimulus                                                             |
| O15144   | Actin-related protein 2/3 complex subunit 2 [OS=Homo sapiens]                       | ARPC2           | 4  | 41  | 4  | 12 | 14.602  | cell organization and biogenesis;cellular component movement;regulation of biological process;response to stimulus                                                             |
| Q6DD88   | Atlastin-3 [OS=Homo sapiens]                                                        | ATL3            | 4  | 66  | 4  | 11 | 27.694  | cell organization and biogenesis;regulation of biological process;transport                                                                                                    |
| P48047   | ATP synthase subunit O, mitochondrial [OS=Homo sapiens]                             | ATP5O           | 4  | 84  | 4  | 20 | 15.389  | cell organization and biogenesis;metabolic process;transport                                                                                                                   |
| P21281   | V-type proton ATPase subunit B, brain isoform [OS=Homo sapiens]                     | ATP6V1 B2       | 4  | 47  | 4  | 12 | 14.648  | cellular homeostasis;metabolic process;regulation of biological process;response to stimulus;transport                                                                         |
| O43684   | Mitotic checkpoint protein BUB3 [OS=Homo sapiens]                                   | BUB3            | 4  | 39  | 4  | 13 | 17.118  | cell division;cell organization and biogenesis;metabolic process;regulation of biological process                                                                              |
| Q9NQ88   | Fructose-2,6-bisphosphatase TIGAR [OS=Homo sapiens]                                 | C12orf5; TIGAR  | 2  | 19  | 2  | 10 | 8.744   | cell death;metabolic process;regulation of biological process;response to stimulus                                                                                             |
| Q9Y3I0   | tRNA-splicing ligase RtcB homolog [OS=Homo sapiens]                                 | C22orf2 8; RTCB | 7  | 78  | 7  | 16 | 39.425  | metabolic process                                                                                                                                                              |
| Q13557   | Calcium/calmodulin-dependent protein kinase type II subunit delta [OS=Homo sapiens] | CAMK2 D         | 3  | 41  | 3  | 7  | 14.872  | cell differentiation;cell organization and biogenesis;cellular component movement;cellular homeostasis;metabolic process;regulation of biological process;response to stimulus |
| Q86VP6-1 | cullin-associated nedd8-dissociated protein 1 [OS=Homo sapiens]                     | CAND1           | 27 | 356 | 27 | 25 | 145.672 | cell differentiation;cell organization and biogenesis;cellular homeostasis;metabolic process;regulation of biological process;transport                                        |
| P27824   | Calnexin [OS=Homo sapiens]                                                          | CANX            | 4  | 27  | 4  | 8  | 18.981  | metabolic process;regulation of biological process;response to stimulus;transport                                                                                              |

|        |                                                               |                |    |     |    |    |        |                                                                                                                                                                                                             |
|--------|---------------------------------------------------------------|----------------|----|-----|----|----|--------|-------------------------------------------------------------------------------------------------------------------------------------------------------------------------------------------------------------|
| P07384 | Calpain-1 catalytic subunit<br>[OS=Homo sapiens]              | CAPN1          | 4  | 51  | 4  | 7  | 22.1   | cell death;cell organization and biogenesis;metabolic process;regulation of biological process;transport                                                                                                    |
| P52907 | F-actin-capping protein subunit alpha-1 [OS=Homo sapiens]     | CAPZA 1        | 3  | 46  | 2  | 14 | 13.776 | cell organization and biogenesis;cellular component movement;coagulation;defense response;regulation of biological process;response to stimulus;transport                                                   |
| P47755 | F-actin-capping protein subunit alpha-2 [OS=Homo sapiens]     | CAPZA 2        | 3  | 53  | 2  | 14 | 18.233 | cell organization and biogenesis;cellular component movement;coagulation;defense response;regulation of biological process;response to stimulus;transport                                                   |
| Q86X55 | Histone-arginine methyltransferase CARM1<br>[OS=Homo sapiens] | CARM1          | 3  | 39  | 3  | 10 | 15.348 | cell organization and biogenesis;metabolic process;regulation of biological process;response to stimulus                                                                                                    |
| P04040 | catalase [OS=Homo sapiens]                                    | CAT            | 3  | 22  | 3  | 9  | 16.407 | cell differentiation;cell organization and biogenesis;metabolic process;regulation of biological process;response to stimulus;transport                                                                     |
| Q03135 | Caveolin-1 [OS=Homo sapiens]                                  | CAV1           | 3  | 157 | 3  | 25 | 22.318 | cell communication;cell differentiation;cell organization and biogenesis;cellular component movement;cellular homeostasis;metabolic process;regulation of biological process;response to stimulus;transport |
| P16152 | Carbonyl reductase [NADPH] 1<br>[OS=Homo sapiens]             | CBR1;<br>SETD4 | 7  | 133 | 7  | 41 | 39.257 | cell differentiation;metabolic process                                                                                                                                                                      |
| P48643 | T-complex protein 1 subunit epsilon [OS=Homo sapiens]         | CCT5           | 13 | 181 | 13 | 29 | 56.303 | metabolic process;regulation of biological process;response to stimulus;transport                                                                                                                           |
| P21926 | CD9 antigen [OS=Homo sapiens]                                 | CD9            | 2  | 72  | 2  | 4  | 15.598 | cell organization and biogenesis;cellular component movement;metabolic process;regulation of biological                                                                                                     |

|          |                                                            |                              |    |     |    |    |         |                                                                                                                                                                                                                                                |
|----------|------------------------------------------------------------|------------------------------|----|-----|----|----|---------|------------------------------------------------------------------------------------------------------------------------------------------------------------------------------------------------------------------------------------------------|
|          |                                                            |                              |    |     |    |    |         | process;response to stimulus;transport                                                                                                                                                                                                         |
| Q16543   | Hsp90 co-chaperone Cdc37 [OS=Homo sapiens]                 | CDC37                        | 4  | 42  | 4  | 14 | 19.443  | cell division;metabolic process;regulation of biological process;response to stimulus;transport                                                                                                                                                |
| Q00535   | Cyclin-dependent-like kinase 5 [OS=Homo sapiens]           | CDK5                         | 3  | 18  | 3  | 9  | 12.872  | cell communication;cell death;cell differentiation;cell division;cell growth;cell organization and biogenesis;cell proliferation;cellular component movement;metabolic process;regulation of biological process;response to stimulus;transport |
| O00299   | chloride intracellular channel protein 1 [OS=Homo sapiens] | CLIC1                        | 7  | 124 | 7  | 45 | 47.443  | metabolic process;regulation of biological process;response to stimulus;transport                                                                                                                                                              |
| Q9Y696   | Chloride intracellular channel protein 4 [OS=Homo sapiens] | CLIC4                        | 8  | 46  | 8  | 43 | 27.706  | cell differentiation;cell organization and biogenesis;cellular homeostasis;metabolic process;regulation of biological process;response to stimulus;transport                                                                                   |
| Q96KP4   | cytosolic non-specific dipeptidase [OS=Homo sapiens]       | CNDP2                        | 3  | 15  | 3  | 10 | 8.701   | metabolic process                                                                                                                                                                                                                              |
| Q8NBJS   | Procollagen galactosyltransferase 1 [OS=Homo sapiens]      | COLGA<br>LT1;<br>GLT25D<br>1 | 5  | 38  | 5  | 9  | 21.911  |                                                                                                                                                                                                                                                |
| P21964-1 | Catechol O-methyltransferase [OS=Homo sapiens]             | COMT                         | 4  | 35  | 4  | 20 | 22.626  | cell communication;metabolic process;regulation of biological process;response to stimulus                                                                                                                                                     |
| P53618   | Coatomer subunit beta [OS=Homo sapiens]                    | COPB1                        | 14 | 133 | 14 | 19 | 65.74   | transport                                                                                                                                                                                                                                      |
| P35606   | Coatomer subunit beta' [OS=Homo sapiens]                   | COPB2                        | 11 | 127 | 11 | 16 | 49.446  | transport                                                                                                                                                                                                                                      |
| Q9Y678   | Coatomer subunit gamma-1 [OS=Homo sapiens]                 | COPG1                        | 17 | 285 | 17 | 28 | 108.994 | cellular component movement;transport                                                                                                                                                                                                          |
| P61923   | Coatomer subunit zeta-1 [OS=Homo sapiens]                  | COPZ1                        | 3  | 30  | 3  | 27 | 14.817  | transport                                                                                                                                                                                                                                      |

|          |                                                                                  |        |    |     |    |    |        |                                                                                                                                                                                                                       |
|----------|----------------------------------------------------------------------------------|--------|----|-----|----|----|--------|-----------------------------------------------------------------------------------------------------------------------------------------------------------------------------------------------------------------------|
| Q99829   | Copine-1 [OS=Homo sapiens]                                                       | CPNE1  | 4  | 42  | 4  | 7  | 17.563 | cell differentiation;cell growth;metabolic process;regulation of biological process;response to stimulus;transport                                                                                                    |
| P36551   | Oxygen-dependent coproporphyrinogen-III oxidase, mitochondrial [OS=Homo sapiens] | CPOX   | 4  | 36  | 4  | 12 | 18.099 | metabolic process;response to stimulus                                                                                                                                                                                |
| P52943   | Cysteine-rich protein 2 [OS=Homo sapiens]                                        | CRIP2  | 4  | 62  | 4  | 32 | 23.822 | regulation of biological process                                                                                                                                                                                      |
| P41240   | tyrosine-protein kinase CSK [OS=Homo sapiens]                                    | CSK    | 3  | 14  | 3  | 8  | 9.862  | cell differentiation;cell organization and biogenesis;defense response;metabolic process;regulation of biological process;response to stimulus                                                                        |
| P56545   | c-terminal-binding protein 2 [OS=Homo sapiens]                                   | CTBP2  | 2  | 25  | 1  | 6  | 9.605  | cell differentiation;metabolic process;regulation of biological process                                                                                                                                               |
| P35222   | Catenin beta-1 [OS=Homo sapiens]                                                 | CTNNB1 | 9  | 43  | 6  | 17 | 44.974 | cell communication;cell differentiation;cell growth;cell organization and biogenesis;cell proliferation;cellular component movement;metabolic process;regulation of biological process;response to stimulus;transport |
| O60716-1 | Catenin delta-1 [OS=Homo sapiens]                                                | CTNND1 | 12 | 141 | 12 | 18 | 56.114 | cell organization and biogenesis;metabolic process;regulation of biological process;response to stimulus                                                                                                              |
| O43169   | Cytochrome b5 type B [OS=Homo sapiens]                                           | CYB5B  | 3  | 49  | 3  | 45 | 24.678 | metabolic process;transport                                                                                                                                                                                           |
| Q7L576-1 | cytoplasmic FMR1-interacting protein 1 [OS=Homo sapiens]                         | CYFIP1 | 8  | 85  | 8  | 7  | 43.014 | cell differentiation;cell growth;cell organization and biogenesis;development;regulation of biological process;response to stimulus;transport                                                                         |
| P61803   | Dolichyl-diphosphooligosaccharide--protein glycosyltransferase                   | DAD1   | 3  | 43  | 3  | 29 | 15.652 | cell death;metabolic process;regulation of biological process;response to stimulus                                                                                                                                    |

|          |                                                                          |         |    |     |    |    |         |                                                                                                                                                |
|----------|--------------------------------------------------------------------------|---------|----|-----|----|----|---------|------------------------------------------------------------------------------------------------------------------------------------------------|
|          | subunit DAD1 [OS=Homo sapiens]                                           |         |    |     |    |    |         |                                                                                                                                                |
| P14868   | Aspartate--tRNA ligase, cytoplasmic [OS=Homo sapiens]                    | DARS    | 12 | 114 | 12 | 28 | 45.131  | cell organization and biogenesis;metabolic process                                                                                             |
| Q6PI48   | Aspartate--tRNA ligase, mitochondrial [OS=Homo sapiens]                  | DARS2   | 3  | 37  | 3  | 6  | 13.475  | metabolic process                                                                                                                              |
| Q92499   | ATP-dependent RNA helicase DDX1 [OS=Homo sapiens]                        | DDX1    | 7  | 92  | 7  | 10 | 34.476  | cell organization and biogenesis;development;metabolic process;regulation of biological process;response to stimulus                           |
| Q92841-1 | Isoform 2 of Probable ATP-dependent RNA helicase DDX17 [OS=Homo sapiens] | DDX17   | 18 | 394 | 12 | 27 | 104.908 | cell differentiation;cell organization and biogenesis;defense response;metabolic process;regulation of biological process;response to stimulus |
| Q9NR30-1 | Nucleolar RNA helicase 2 [OS=Homo sapiens]                               | DDX21   | 6  | 42  | 6  | 9  | 21.475  | cell differentiation;metabolic process;regulation of biological process;response to stimulus                                                   |
| O00148   | ATP-dependent RNA helicase DDX39A [OS=Homo sapiens]                      | DDX39 A | 9  | 184 | 2  | 23 | 48.632  | metabolic process;regulation of biological process;response to stimulus;transport                                                              |
| Q13838-1 | spliceosome RNA helicase DDX39B [OS=Homo sapiens]                        | DDX39 B | 10 | 183 | 3  | 23 | 51.709  | cell organization and biogenesis;metabolic process;regulation of biological process;transport                                                  |
| O00571   | ATP-dependent RNA helicase DDX3X [OS=Homo sapiens]                       | DDX3X   | 10 | 210 | 8  | 16 | 62.417  | cell death;cell organization and biogenesis;defense response;metabolic process;regulation of biological process;response to stimulus;transport |
| Q86XP3-1 | ATP-dependent RNA helicase DDX42 [OS=Homo sapiens]                       | DDX42   | 3  | 22  | 3  | 3  | 10.88   | metabolic process;regulation of biological process                                                                                             |
| Q7L014   | probable ATP-dependent RNA helicase DDX46 [OS=Homo sapiens]              | DDX46   | 8  | 106 | 8  | 10 | 36.291  | metabolic process;regulation of biological process                                                                                             |
| P26196   | Probable ATP-dependent RNA helicase DDX6 [OS=Homo sapiens]               | DDX6    | 7  | 72  | 7  | 20 | 32.456  | cell organization and biogenesis;metabolic process;regulation of biological process                                                            |

|          |                                                                                                                                                   |             |    |     |    |    |        |                                                                                                                                |
|----------|---------------------------------------------------------------------------------------------------------------------------------------------------|-------------|----|-----|----|----|--------|--------------------------------------------------------------------------------------------------------------------------------|
| P23743-1 | diacylglycerol kinase alpha<br>[OS=Homo sapiens]                                                                                                  | DGKA        | 3  | 12  | 3  | 6  | 9.986  | metabolic process;regulation of<br>biological process;response to<br>stimulus                                                  |
| Q43143   | Pre-mRNA-splicing factor ATP-<br>dependent RNA helicase<br>DHX15 [OS=Homo sapiens]                                                                | DHX15       | 8  | 82  | 8  | 11 | 33.94  | metabolic process;response to<br>stimulus                                                                                      |
| P09622   | Dihydrolipoyl dehydrogenase,<br>mitochondrial [OS=Homo<br>sapiens]                                                                                | DLD         | 4  | 42  | 4  | 13 | 15.742 | cellular homeostasis;metabolic<br>process;regulation of biological<br>process                                                  |
| P36957   | Dihydrolipoyllysine-residue<br>succinyltransferase component<br>of 2-oxoglutarate<br>dehydrogenase complex,<br>mitochondrial [OS=Homo<br>sapiens] | DLST        | 3  | 56  | 3  | 8  | 22.62  | metabolic process                                                                                                              |
| Q9UDY4   | DnaJ homolog subfamily B<br>member 4 [OS=Homo sapiens]                                                                                            | DNAJB4      | 4  | 44  | 3  | 17 | 14.628 | metabolic process;regulation of<br>biological process;response to<br>stimulus                                                  |
| Q8IXB1-1 | DnaJ homolog subfamily C<br>member 10 [OS=Homo<br>sapiens]                                                                                        | DNAJC<br>10 | 5  | 38  | 4  | 6  | 15.207 | cellular homeostasis;metabolic<br>process;regulation of biological<br>process;response to stimulus                             |
| O00429   | Dynamin-1-like protein<br>[OS=Homo sapiens]                                                                                                       | DNM1L       | 9  | 68  | 9  | 16 | 31.972 | cell death;cell organization and<br>biogenesis;regulation of biological<br>process;response to<br>stimulus;transport           |
| P50570-1 | Dynamin-2 [OS=Homo sapiens]                                                                                                                       | DNM2        | 7  | 115 | 7  | 9  | 26.088 | cell organization and<br>biogenesis;metabolic<br>process;regulation of biological<br>process;response to<br>stimulus;transport |
| Q9Y295   | developmentally-regulated<br>GTP-binding protein 1<br>[OS=Homo sapiens]                                                                           | DRG1        | 6  | 65  | 6  | 23 | 29.759 | development;metabolic process                                                                                                  |
| O75923-1 | dysferlin [OS=Homo sapiens]                                                                                                                       | DYSF        | 3  | 20  | 3  | 2  | 13.4   | cell organization and biogenesis                                                                                               |
| Q12805   | EGF-containing fibulin-like<br>extracellular matrix protein 1<br>[OS=Homo sapiens]                                                                | EFEMP<br>1  | 7  | 74  | 7  | 17 | 26.956 | metabolic process;regulation of<br>biological process;response to<br>stimulus                                                  |
| Q15029   | 116 kDa U5 small nuclear<br>ribonucleoprotein component<br>[OS=Homo sapiens]                                                                      | EFTUD<br>2  | 2  | 55  | 1  | 2  | 9.595  | cell organization and<br>biogenesis;metabolic<br>process;response to stimulus                                                  |
| Q9H4M9   | EH domain-containing protein 1<br>[OS=Homo sapiens]                                                                                               | EHD1        | 14 | 212 | 13 | 41 | 81.472 | cell organization and<br>biogenesis;coagulation;regulation of                                                                  |

|          |                                                                                     |         |    |     |    |    |        |                                                                                                             |
|----------|-------------------------------------------------------------------------------------|---------|----|-----|----|----|--------|-------------------------------------------------------------------------------------------------------------|
|          |                                                                                     |         |    |     |    |    |        | biological process;response to stimulus;transport                                                           |
| Q9NZN4   | EH domain-containing protein 2 [OS=Homo sapiens]                                    | EHD2    | 6  | 49  | 5  | 12 | 28.195 | cell organization and biogenesis;coagulation;regulation of biological process;transport                     |
| Q9H223   | EH domain-containing protein 4 [OS=Homo sapiens]                                    | EHD4    | 7  | 99  | 7  | 16 | 33.887 | cell organization and biogenesis;regulation of biological process;response to stimulus;transport            |
| Q9BY44-1 | Eukaryotic translation initiation factor 2A [OS=Homo sapiens]                       | EIF2A   | 3  | 24  | 3  | 8  | 11.168 | cell organization and biogenesis;metabolic process;regulation of biological process;response to stimulus    |
| P19525   | interferon-induced, double-stranded RNA-activated protein kinase [OS=Homo sapiens]  | EIF2AK2 | 2  | 17  | 2  | 4  | 6.913  | cell communication;defense response;metabolic process;regulation of biological process;response to stimulus |
| P41091   | eukaryotic translation initiation factor 2 subunit 3 [OS=Homo sapiens]              | EIF2S3  | 8  | 94  | 8  | 26 | 39.684 | metabolic process;transport                                                                                 |
| Q14152   | Eukaryotic translation initiation factor 3 subunit A [OS=Homo sapiens]              | EIF3A   | 12 | 109 | 12 | 11 | 53.257 | cell organization and biogenesis;metabolic process;regulation of biological process                         |
| B5ME19   | eukaryotic translation initiation factor 3 subunit C-like protein [OS=Homo sapiens] | EIF3CL  | 6  | 113 | 6  | 7  | 35.695 | metabolic process                                                                                           |
| P60228   | Eukaryotic translation initiation factor 3 subunit E [OS=Homo sapiens]              | EIF3E   | 4  | 44  | 4  | 11 | 17.353 | metabolic process;regulation of biological process                                                          |
| O00303   | Eukaryotic translation initiation factor 3 subunit F [OS=Homo sapiens]              | EIF3F   | 4  | 57  | 4  | 13 | 24.747 | metabolic process                                                                                           |
| Q9Y262   | eukaryotic translation initiation factor 3 subunit L [OS=Homo sapiens]              | EIF3L   | 4  | 32  | 4  | 10 | 21.31  | metabolic process                                                                                           |
| Q14240-1 | eukaryotic initiation factor 4A-II [OS=Homo sapiens]                                | EIF4A2  | 10 | 354 | 2  | 27 | 79.092 | metabolic process;regulation of biological process                                                          |
| P38919   | Eukaryotic initiation factor 4A-III [OS=Homo sapiens]                               | EIF4A3  | 4  | 60  | 3  | 12 | 22.959 | metabolic process;regulation of biological process;response to stimulus;transport                           |

|          |                                                                               |         |    |     |    |    |        |                                                                                                                                                                                                                      |
|----------|-------------------------------------------------------------------------------|---------|----|-----|----|----|--------|----------------------------------------------------------------------------------------------------------------------------------------------------------------------------------------------------------------------|
| Q04637   | eukaryotic translation initiation factor 4 gamma 1 [OS=Homo sapiens]          | EIF4G1  | 3  | 16  | 3  | 2  | 13.446 | cell organization and biogenesis;defense response;metabolic process;regulation of biological process;response to stimulus                                                                                            |
| Q6IS14   | Eukaryotic translation initiation factor 5A-1-like [OS=Homo sapiens]          | EIF5AL1 | 3  | 13  | 3  | 33 | 8.843  | metabolic process;regulation of biological process;transport                                                                                                                                                         |
| P17813   | Endoglin [OS=Homo sapiens]                                                    | ENG     | 7  | 47  | 7  | 13 | 31.57  | cell differentiation;cell organization and biogenesis;cellular component movement;regulation of biological process;response to stimulus;transport                                                                    |
| P29317   | Ephrin type-A receptor 2 [OS=Homo sapiens]                                    | EPHA2   | 4  | 27  | 4  | 4  | 15.174 | cell death;cell differentiation;cell organization and biogenesis;cell proliferation;cellular component movement;defense response;development;metabolic process;regulation of biological process;response to stimulus |
| P07814   | Bifunctional glutamate/proline--tRNA ligase [OS=Homo sapiens]                 | EPRS    | 14 | 113 | 14 | 13 | 51.704 | cell organization and biogenesis;metabolic process;regulation of biological process;response to stimulus                                                                                                             |
| Q9NZ08-1 | endoplasmic reticulum aminopeptidase 1 [OS=Homo sapiens]                      | ERAP1   | 7  | 46  | 7  | 8  | 22.243 | cell communication;cell differentiation;metabolic process;regulation of biological process;response to stimulus                                                                                                      |
| P84090   | Enhancer of rudimentary homolog [OS=Homo sapiens]                             | ERH     | 2  | 28  | 2  | 28 | 11.73  | metabolic process;regulation of biological process                                                                                                                                                                   |
| Q9BSJ8   | Extended synaptotagmin-1 [OS=Homo sapiens]                                    | ESYT1   | 7  | 46  | 7  | 8  | 32.169 | metabolic process;transport                                                                                                                                                                                          |
| A0FGR8-1 | Extended synaptotagmin-2 [OS=Homo sapiens]                                    | ESYT2   | 7  | 48  | 7  | 10 | 28.763 | metabolic process;transport                                                                                                                                                                                          |
| P62495   | Eukaryotic peptide chain release factor subunit 1 [OS=Homo sapiens]           | ETF1    | 5  | 60  | 5  | 14 | 25.537 | cell organization and biogenesis;metabolic process;regulation of biological process                                                                                                                                  |
| P13804-1 | Electron transfer flavoprotein subunit alpha, mitochondrial [OS=Homo sapiens] | ETFA    | 3  | 41  | 3  | 14 | 14.415 | metabolic process;transport                                                                                                                                                                                          |



|          |                                                                         |          |    |     |    |    |        |                                                                                                                                                                     |
|----------|-------------------------------------------------------------------------|----------|----|-----|----|----|--------|---------------------------------------------------------------------------------------------------------------------------------------------------------------------|
| Q95571   | Persulfide dioxygenase ETHE1, mitochondrial [OS=Homo sapiens]           | ETHE1    | 2  | 43  | 2  | 12 | 10.45  | metabolic process                                                                                                                                                   |
| P15311   | Ezrin [OS=Homo sapiens]                                                 | EZR      | 12 | 351 | 3  | 19 | 64.669 | cell differentiation;cell organization and biogenesis;cellular component movement;metabolic process;regulation of biological process;response to stimulus;transport |
| Q9NZB2-1 | Constitutive coactivator of PPAR-gamma-like protein 1 [OS=Homo sapiens] | FAM120 A | 6  | 38  | 6  | 8  | 16.621 |                                                                                                                                                                     |
| Q96TA1   | Niban-like protein 1 [OS=Homo sapiens]                                  | FAM129 B | 8  | 106 | 8  | 12 | 36.864 | cell differentiation;cellular component movement;metabolic process;regulation of biological process;transport                                                       |
| Q9BRX8-1 | Redox-regulatory protein FAM213A [OS=Homo sapiens]                      | FAM213 A | 8  | 170 | 8  | 34 | 41.341 | metabolic process;regulation of biological process                                                                                                                  |
| Q9NSD9   | Phenylalanine--tRNA ligase beta subunit [OS=Homo sapiens]               | FARSB    | 5  | 60  | 5  | 9  | 19.341 | cell organization and biogenesis;metabolic process                                                                                                                  |
| P14324   | Farnesyl pyrophosphate synthase [OS=Homo sapiens]                       | FDPS     | 2  | 40  | 2  | 7  | 9.005  | metabolic process;regulation of biological process                                                                                                                  |
| P22570   | NADPH:adrenodoxin oxidoreductase, mitochondrial [OS=Homo sapiens]       | FDXR     | 8  | 82  | 8  | 18 | 37.195 | metabolic process;transport                                                                                                                                         |
| P39748   | Flap endonuclease 1 [OS=Homo sapiens]                                   | FEN1     | 2  | 25  | 2  | 8  | 9.925  | cell organization and biogenesis;cellular homeostasis;metabolic process;regulation of biological process;response to stimulus                                       |
| P07954   | fumarate hydratase, mitochondrial [OS=Homo sapiens]                     | FH       | 3  | 44  | 3  | 10 | 18.554 | metabolic process                                                                                                                                                   |
| Q13045-1 | protein flightless-1 homolog [OS=Homo sapiens]                          | FLII     | 3  | 50  | 3  | 2  | 15.731 | cell organization and biogenesis;development;metabolic process;regulation of biological process                                                                     |
| P51570   | galactokinase [OS=Homo sapiens]                                         | GALK1    | 3  | 29  | 3  | 11 | 11.034 | metabolic process                                                                                                                                                   |
| Q14697-1 | Neutral alpha-glucosidase AB [OS=Homo sapiens]                          | GANAB    | 13 | 384 | 13 | 15 | 90.669 | metabolic process                                                                                                                                                   |

|          |                                                                                       |               |    |     |    |    |        |                                                                                                                                                             |
|----------|---------------------------------------------------------------------------------------|---------------|----|-----|----|----|--------|-------------------------------------------------------------------------------------------------------------------------------------------------------------|
| P22102-1 | trifunctional purine biosynthetic protein adenosine-3 [OS=Homo sapiens]               | GART          | 7  | 63  | 7  | 10 | 32.785 | metabolic process;response to stimulus                                                                                                                      |
| Q04446   | 1,4-alpha-glucan-branching enzyme [OS=Homo sapiens]                                   | GBE1          | 6  | 47  | 6  | 15 | 27.184 | metabolic process                                                                                                                                           |
| Q92616   | eIF-2-alpha kinase activator GCN1 [OS=Homo sapiens]                                   | GCN1L 1; GCN1 | 15 | 116 | 15 | 6  | 55.413 | cell communication;metabolic process;regulation of biological process;response to stimulus                                                                  |
| P50395-1 | Rab GDP dissociation inhibitor beta [OS=Homo sapiens]                                 | GDI2          | 16 | 187 | 13 | 51 | 67.241 | metabolic process;regulation of biological process;response to stimulus;transport                                                                           |
| Q06210-1 | glutamine-fructose-6-phosphate aminotransferase [isomerizing] 1 [OS=Homo sapiens]     | GFPT1         | 7  | 48  | 7  | 14 | 24.276 | metabolic process;regulation of biological process                                                                                                          |
| P04899-1 | guanine nucleotide-binding protein G(i) subunit alpha-2 [OS=Homo sapiens]             | GNAI2         | 7  | 82  | 6  | 30 | 26.672 | cell division;cell proliferation;metabolic process;regulation of biological process;response to stimulus                                                    |
| Q5JWF2-1 | Guanine nucleotide-binding protein G(S) subunit alpha isoforms XLas [OS=Homo sapiens] | GNAS          | 4  | 80  | 3  | 5  | 21.463 | metabolic process;regulation of biological process;response to stimulus                                                                                     |
| P62873   | Guanine nucleotide-binding protein G(I)/G(S)/G(T) subunit beta-1 [OS=Homo sapiens]    | GNB1          | 4  | 33  | 4  | 14 | 21.165 | cell death;cell organization and biogenesis;cell proliferation;cellular homeostasis;metabolic process;regulation of biological process;response to stimulus |
| P62879   | Guanine nucleotide-binding protein G(I)/G(S)/G(T) subunit beta-2 [OS=Homo sapiens]    | GNB2          | 3  | 42  | 3  | 10 | 21.707 | metabolic process;regulation of biological process;response to stimulus                                                                                     |
| Q9Y2Q3-1 | Glutathione S-transferase kappa 1 [OS=Homo sapiens]                                   | GSTK1         | 3  | 39  | 3  | 20 | 14.809 | cell differentiation;metabolic process                                                                                                                      |
| P40939   | Trifunctional enzyme subunit alpha, mitochondrial [OS=Homo sapiens]                   | HADHA         | 11 | 180 | 11 | 20 | 71.612 | metabolic process;response to stimulus                                                                                                                      |
| P55084   | Trifunctional enzyme subunit beta, mitochondrial [OS=Homo sapiens]                    | HADHB         | 8  | 69  | 8  | 19 | 29.141 | metabolic process                                                                                                                                           |
| Q00341-1 | Vigilin [OS=Homo sapiens]                                                             | HDLBP         | 11 | 127 | 11 | 12 | 47.817 | metabolic process;transport                                                                                                                                 |

|          |                                                                            |           |    |     |    |    |         |                                                                                          |
|----------|----------------------------------------------------------------------------|-----------|----|-----|----|----|---------|------------------------------------------------------------------------------------------|
| P19367-1 | Hexokinase-1 [OS=Homo sapiens]                                             | HK1       | 14 | 226 | 14 | 16 | 61.779  | cellular homeostasis;metabolic process;regulation of biological process                  |
| Q8TCT9-1 | Minor histocompatibility antigen H13 [OS=Homo sapiens]                     | HM13      | 3  | 26  | 3  | 12 | 16.831  | cell organization and biogenesis;metabolic process                                       |
| Q13151   | Heterogeneous nuclear ribonucleoprotein A0 [OS=Homo sapiens]               | HNRNP A0  | 4  | 64  | 3  | 19 | 23.039  | defense response;metabolic process;regulation of biological process;response to stimulus |
| P51991-1 | Heterogeneous nuclear ribonucleoprotein A3 [OS=Homo sapiens]               | HNRNP A3  | 7  | 95  | 5  | 20 | 39.782  | metabolic process;transport                                                              |
| P52597   | Heterogeneous nuclear ribonucleoprotein F [OS=Homo sapiens]                | HNRNP F   | 7  | 181 | 5  | 26 | 47.484  | metabolic process;regulation of biological process;response to stimulus                  |
| P31943   | Heterogeneous nuclear ribonucleoprotein H [OS=Homo sapiens]                | HNRNP H1  | 12 | 402 | 4  | 34 | 103.361 | metabolic process;regulation of biological process;response to stimulus                  |
| P55795   | heterogeneous nuclear ribonucleoprotein H2 [OS=Homo sapiens]               | HNRNP H2  | 12 | 303 | 5  | 34 | 94.078  | metabolic process                                                                        |
| P31942   | Heterogeneous nuclear ribonucleoprotein H3 [OS=Homo sapiens]               | HNRNP H3  | 4  | 72  | 3  | 17 | 24.351  | cell differentiation;metabolic process                                                   |
| P14866   | Heterogeneous nuclear ribonucleoprotein L [OS=Homo sapiens]                | HNRNP L   | 7  | 43  | 7  | 19 | 21.286  | metabolic process;regulation of biological process                                       |
| O43390-1 | heterogeneous nuclear ribonucleoprotein r [OS=Homo sapiens]                | HNRNP R   | 5  | 67  | 2  | 9  | 20.585  | metabolic process;regulation of biological process                                       |
| Q1KMD3   | heterogeneous nuclear ribonucleoprotein U-like protein 2 [OS=Homo sapiens] | HNRNP UL2 | 9  | 140 | 9  | 15 | 50.875  |                                                                                          |
| Q5SSJ5-1 | Heterochromatin protein 1-binding protein 3 [OS=Homo sapiens]              | HP1BP3    | 6  | 62  | 6  | 11 | 22.697  | cell organization and biogenesis;regulation of biological process;response to stimulus   |
| Q99714-1 | 3-hydroxyacyl-CoA dehydrogenase type-2 [OS=Homo sapiens]                   | HSD17 B10 | 4  | 50  | 4  | 24 | 21.153  | cell organization and biogenesis;metabolic process                                       |
| P51659-1 | peroxisomal multifunctional enzyme type 2 [OS=Homo sapiens]                | HSD17 B4  | 5  | 34  | 5  | 10 | 22.901  | cell differentiation;metabolic process                                                   |

|          |                                                                                               |         |    |     |    |    |        |                                                                                                                                                                |
|----------|-----------------------------------------------------------------------------------------------|---------|----|-----|----|----|--------|----------------------------------------------------------------------------------------------------------------------------------------------------------------|
| Q92598   | Heat shock protein 105 kDa<br>[OS=Homo sapiens]                                               | HSPH1   | 12 | 154 | 10 | 19 | 76.728 | metabolic process;regulation of biological process;response to stimulus;transport                                                                              |
| Q7Z6Z7   | E3 ubiquitin-protein ligase<br>HUWE1 [OS=Homo sapiens]                                        | HUWE1   | 9  | 42  | 9  | 3  | 35.443 | cell differentiation;cell organization and biogenesis;metabolic process;response to stimulus;transport                                                         |
| P41252   | isoleucine--tRNA ligase, cytoplasmic<br>[OS=Homo sapiens]                                     | IARS    | 12 | 110 | 12 | 11 | 51.576 | cell differentiation;metabolic process;regulation of biological process                                                                                        |
| Q9NSE4   | Isoleucine--tRNA ligase, mitochondrial<br>[OS=Homo sapiens]                                   | IARS2   | 5  | 49  | 5  | 6  | 23.511 | metabolic process;regulation of biological process                                                                                                             |
| Q16666-1 | gamma-interferon-inducible protein 16 [OS=Homo sapiens]                                       | IFI16   | 5  | 56  | 5  | 8  | 23.879 | cell communication;cell death;cell differentiation;cell proliferation;defense response;metabolic process;regulation of biological process;response to stimulus |
| Q9NZI8   | Insulin-like growth factor 2 mRNA-binding protein 1<br>[OS=Homo sapiens]                      | IGF2BP1 | 6  | 121 | 5  | 14 | 34.943 | cell proliferation;regulation of biological process;transport                                                                                                  |
| Q9Y6M1   | Insulin-like growth factor 2 mRNA-binding protein 2<br>[OS=Homo sapiens]                      | IGF2BP2 | 8  | 102 | 6  | 18 | 40.57  | regulation of biological process;transport                                                                                                                     |
| O00425   | Insulin-like growth factor 2 mRNA-binding protein 3<br>[OS=Homo sapiens]                      | IGF2BP3 | 8  | 184 | 6  | 20 | 55.213 | metabolic process;regulation of biological process;transport                                                                                                   |
| Q70UQ0   | Inhibitor of nuclear factor kappa-B kinase-interacting protein [OS=Homo sapiens]              | IKBIP   | 7  | 46  | 5  | 20 | 27.242 | response to stimulus                                                                                                                                           |
| Q70UQ0-4 | Isoform 4 of Inhibitor of nuclear factor kappa-B kinase-interacting protein [OS=Homo sapiens] | IKBIP   | 10 | 53  | 8  | 31 | 47.702 | response to stimulus                                                                                                                                           |
| Q8TEX9-1 | Importin-4 [OS=Homo sapiens]                                                                  | IPO4    | 5  | 28  | 5  | 5  | 21.79  | cell organization and biogenesis;transport                                                                                                                     |
| O00410   | Importin-5 [OS=Homo sapiens]                                                                  | IPO5    | 7  | 71  | 7  | 7  | 39.1   | regulation of biological process;response to stimulus;transport                                                                                                |

|          |                                                                            |        |    |     |    |    |         |                                                                                                                                                                              |
|----------|----------------------------------------------------------------------------|--------|----|-----|----|----|---------|------------------------------------------------------------------------------------------------------------------------------------------------------------------------------|
| O95373   | Importin-7 [OS=Homo sapiens]                                               | IPO7   | 7  | 51  | 6  | 9  | 30.846  | defense response;regulation of biological process;response to stimulus;transport                                                                                             |
| Q96P70   | Importin-9 [OS=Homo sapiens]                                               | IPO9   | 2  | 23  | 2  | 4  | 19.99   | transport                                                                                                                                                                    |
| P46940   | Ras GTPase-activating-like protein IQGAP1 [OS=Homo sapiens]                | IQGAP1 | 42 | 822 | 42 | 33 | 290.073 | cell growth;regulation of biological process;response to stimulus;transport                                                                                                  |
| P16144-1 | Integrin beta-4 [OS=Homo sapiens]                                          | ITGB4  | 6  | 64  | 6  | 4  | 27.067  | cell communication;cell differentiation;cell organization and biogenesis;cellular component movement;metabolic process;regulation of biological process;response to stimulus |
| Q15046   | Lysine--tRNA ligase [OS=Homo sapiens]                                      | KARS   | 10 | 46  | 10 | 19 | 34.724  | metabolic process;regulation of biological process;response to stimulus                                                                                                      |
| O00139   | Kinesin-like protein KIF2A [OS=Homo sapiens]                               | KIF2A  | 3  | 20  | 3  | 4  | 9.089   | cell differentiation;cell division;cell organization and biogenesis;cellular component movement;development;transport                                                        |
| Q14974   | Importin subunit beta-1 [OS=Homo sapiens]                                  | KPNB1  | 6  | 66  | 6  | 9  | 27.52   | cell organization and biogenesis;cellular component movement;metabolic process;regulation of biological process;response to stimulus;transport                               |
| Q9P2J5   | Leucine--tRNA ligase, cytoplasmic [OS=Homo sapiens]                        | LARS   | 9  | 114 | 9  | 10 | 38.862  | cell communication;cell organization and biogenesis;metabolic process;regulation of biological process;response to stimulus;transport                                        |
| P49257   | Protein ERGIC-53 [OS=Homo sapiens]                                         | LMAN1  | 3  | 36  | 3  | 6  | 10.963  | cell organization and biogenesis;coagulation;metabolic process;regulation of biological process;transport                                                                    |
| Q7L5N7   | Lysophosphatidylcholine acyltransferase 2 [OS=Homo sapiens]                | LPCAT2 | 8  | 122 | 8  | 25 | 48.991  | cell organization and biogenesis;metabolic process                                                                                                                           |
| P42704   | Leucine-rich PPR motif-containing protein, mitochondrial [OS=Homo sapiens] | LRPPRC | 12 | 107 | 12 | 12 | 54.149  | cellular component movement;metabolic process;regulation of biological process;transport                                                                                     |

|          |                                                                                 |          |    |     |    |    |        |                                                                                                                     |
|----------|---------------------------------------------------------------------------------|----------|----|-----|----|----|--------|---------------------------------------------------------------------------------------------------------------------|
| P09960-1 | leukotriene A-4 hydrolase<br>[OS=Homo sapiens]                                  | LTA4H    | 6  | 68  | 6  | 12 | 44.086 | metabolic process;transport                                                                                         |
| Q9UPN3   | Microtubule-actin cross-linking factor 1, isoforms 1/2/3/5<br>[OS=Homo sapiens] | MACF1    | 15 | 128 | 4  | 2  | 52.118 | cell organization and biogenesis;regulation of biological process;response to stimulus;transport                    |
| P46821   | microtubule-associated protein 1B [OS=Homo sapiens]                             | MAP1B    | 2  | 32  | 2  | 2  | 11.527 | cell growth;cell organization and biogenesis;cellular component movement;regulation of biological process;transport |
| P27816-1 | Microtubule-associated protein 4 [OS=Homo sapiens]                              | MAP4     | 3  | 23  | 3  | 4  | 9.727  | cell division;cell organization and biogenesis;cellular component movement;regulation of biological process         |
| P56192   | Methionine--tRNA ligase, cytoplasmic [OS=Homo sapiens]                          | MARS     | 4  | 45  | 4  | 6  | 14.988 | cell communication;metabolic process;regulation of biological process;response to stimulus                          |
| P43243   | Matrin-3 [OS=Homo sapiens]                                                      | MATR3    | 10 | 129 | 10 | 18 | 52.57  | defense response;regulation of biological process;response to stimulus                                              |
| P49736   | DNA replication licensing factor mcm2 [OS=Homo sapiens]                         | MCM2     | 5  | 53  | 5  | 7  | 22.048 | cell death;cell organization and biogenesis;metabolic process;response to stimulus                                  |
| P25205   | DNA replication licensing factor mcm3 [OS=Homo sapiens]                         | MCM3     | 9  | 84  | 9  | 14 | 41.663 | metabolic process                                                                                                   |
| P33992   | DNA replication licensing factor mcm5 [OS=Homo sapiens]                         | MCM5     | 6  | 66  | 6  | 11 | 22.777 | cell division;metabolic process                                                                                     |
| Q14566   | DNA replication licensing factor MCM6 [OS=Homo sapiens]                         | MCM6     | 5  | 52  | 5  | 10 | 25.499 | metabolic process                                                                                                   |
| P33993-1 | DNA replication licensing factor MCM7 [OS=Homo sapiens]                         | MCM7     | 7  | 47  | 7  | 13 | 22.492 | cell proliferation;metabolic process;regulation of biological process;response to stimulus                          |
| O60502   | protein O-GlcNAcase [OS=Homo sapiens]                                           | MGEA5    | 3  | 10  | 3  | 4  | 11.843 | metabolic process                                                                                                   |
| P11586   | C-1-tetrahydrofolate synthase, cytoplasmic [OS=Homo sapiens]                    | MTHFD 1  | 13 | 185 | 13 | 17 | 62.894 | metabolic process                                                                                                   |
| Q6UB35-1 | Monofunctional C1-tetrahydrofolate synthase, mitochondrial [OS=Homo sapiens]    | MTHFD 1L | 3  | 33  | 3  | 4  | 13.247 | metabolic process                                                                                                   |

|          |                                                                                        |                |    |     |    |    |        |                                                                                                                                                                     |
|----------|----------------------------------------------------------------------------------------|----------------|----|-----|----|----|--------|---------------------------------------------------------------------------------------------------------------------------------------------------------------------|
| Q96S97   | myeloid-associated differentiation marker [OS=Homo sapiens]                            | MYADM          | 2  | 48  | 2  | 10 | 12.224 | cell organization and biogenesis;regulation of biological process                                                                                                   |
| P35579-1 | Myosin-9 [OS=Homo sapiens]                                                             | MYH9           | 19 | 121 | 15 | 13 | 84.955 | cell differentiation;cell organization and biogenesis;cellular component movement;metabolic process;regulation of biological process;response to stimulus;transport |
| Q9BXJ9   | N-alpha-acetyltransferase 15, NatA auxiliary subunit [OS=Homo sapiens]                 | NAA15          | 6  | 55  | 6  | 7  | 24.723 | cell differentiation;development;metabolic process;regulation of biological process                                                                                 |
| P43490   | nicotinamide phosphoribosyltransferase [OS=Homo sapiens]                               | NAMPT          | 8  | 81  | 8  | 20 | 32.365 | cell communication;metabolic process;regulation of biological process;response to stimulus                                                                          |
| P55209   | Nucleosome assembly protein 1-like 1 [OS=Homo sapiens]                                 | NAP1L1         | 3  | 65  | 2  | 12 | 21.537 | cell organization and biogenesis;metabolic process;regulation of biological process                                                                                 |
| O43776   | Asparagine--tRNA ligase, cytoplasmic [OS=Homo sapiens]                                 | NARS           | 5  | 37  | 5  | 9  | 22.133 | metabolic process                                                                                                                                                   |
| Q6PIU2   | Neutral cholesterol ester hydrolase 1 [OS=Homo sapiens]                                | NCEH1          | 6  | 123 | 6  | 23 | 41.476 | metabolic process                                                                                                                                                   |
| Q9Y2A7-1 | Nck-associated protein 1 [OS=Homo sapiens]                                             | NCKAP1         | 7  | 43  | 7  | 9  | 22.595 | cell death;cell organization and biogenesis;regulation of biological process;response to stimulus                                                                   |
| O75251   | NADH dehydrogenase [ubiquinone] iron-sulfur protein 7, mitochondrial [OS=Homo sapiens] | NDUFS7         | 2  | 27  | 2  | 11 | 13.756 | cell organization and biogenesis;metabolic process;transport                                                                                                        |
| Q8TD19   | Serine/threonine-protein kinase Nek9 [OS=Homo sapiens]                                 | NEK9           | 2  | 20  | 2  | 2  | 10.033 | cell division;cell organization and biogenesis;metabolic process                                                                                                    |
| P55769   | NHP2-like protein 1 [OS=Homo sapiens]                                                  | NHP2L1 ; SNU13 | 2  | 17  | 2  | 19 | 8.397  | cell organization and biogenesis;metabolic process                                                                                                                  |
| Q15233   | Non-POU domain-containing octamer-binding protein [OS=Homo sapiens]                    | NONO           | 8  | 139 | 8  | 30 | 41.014 | defense response;metabolic process;regulation of biological process;response to stimulus                                                                            |
| O00567   | Nucleolar protein 56 [OS=Homo sapiens]                                                 | NOP56          | 6  | 49  | 6  | 16 | 24.337 | metabolic process                                                                                                                                                   |

|          |                                                             |        |    |     |    |    |         |                                                                                                                                                           |
|----------|-------------------------------------------------------------|--------|----|-----|----|----|---------|-----------------------------------------------------------------------------------------------------------------------------------------------------------|
| P29474   | Nitric oxide synthase, endothelial [OS=Homo sapiens]        | NOS3   | 21 | 199 | 21 | 23 | 111.995 | cell organization and biogenesis;cellular component movement;cellular homeostasis;metabolic process;regulation of biological process;response to stimulus |
| P55786   | puromycin-sensitive aminopeptidase [OS=Homo sapiens]        | NPEPPS | 17 | 241 | 17 | 21 | 82.959  | metabolic process;response to stimulus                                                                                                                    |
| P06748   | Nucleophosmin [OS=Homo sapiens]                             | NPM1   | 3  | 42  | 3  | 14 | 13.756  | cell growth;cell organization and biogenesis;cellular homeostasis;metabolic process;regulation of biological process;response to stimulus;transport       |
| P15559-1 | NAD(P)H dehydrogenase [quinone] 1 [OS=Homo sapiens]         | NQO1   | 3  | 67  | 3  | 15 | 19.779  | cell communication;metabolic process;regulation of biological process;response to stimulus                                                                |
| P46459   | Vesicle-fusing ATPase [OS=Homo sapiens]                     | NSF    | 8  | 66  | 8  | 12 | 36.537  | cell organization and biogenesis;metabolic process;regulation of biological process;response to stimulus;transport                                        |
| Q9BSD7   | Cancer-related nucleoside-triphosphatase [OS=Homo sapiens]  | NTPCR  | 2  | 25  | 2  | 14 | 12.919  | metabolic process;response to stimulus                                                                                                                    |
| Q8N1F7-1 | Nuclear pore complex protein Nup93 [OS=Homo sapiens]        | NUP93  | 3  | 21  | 3  | 5  | 11.066  | cell organization and biogenesis;cellular component movement;metabolic process;regulation of biological process;response to stimulus;transport            |
| P04181-1 | Ornithine aminotransferase, mitochondrial [OS=Homo sapiens] | OAT    | 5  | 48  | 5  | 14 | 21.912  | cell organization and biogenesis;metabolic process                                                                                                        |
| Q56VL3   | OCIA domain-containing protein 2 [OS=Homo sapiens]          | OCIAD2 | 3  | 23  | 3  | 20 | 11.771  |                                                                                                                                                           |
| Q96FW1   | Ubiquitin thioesterase otub1 [OS=Homo sapiens]              | OTUB1  | 3  | 23  | 3  | 13 | 11.909  | metabolic process;regulation of biological process;response to stimulus                                                                                   |
| P07237   | Protein disulfide-isomerase [OS=Homo sapiens]               | P4HB   | 5  | 82  | 5  | 11 | 26.87   | cell organization and biogenesis;cellular                                                                                                                 |



|        |                                                                                                  |         |   |    |   |    |        |                                                                                                                                                        |
|--------|--------------------------------------------------------------------------------------------------|---------|---|----|---|----|--------|--------------------------------------------------------------------------------------------------------------------------------------------------------|
|        |                                                                                                  |         |   |    |   |    |        | homeostasis;metabolic process;regulation of biological process;response to stimulus                                                                    |
| Q9UQ80 | proliferation-associated protein 2G4 [OS=Homo sapiens]                                           | PA2G4   | 6 | 45 | 6 | 18 | 18.858 | cell proliferation;metabolic process;regulation of biological process;transport                                                                        |
| Q13177 | Serine/threonine-protein kinase PAK 2 [OS=Homo sapiens]                                          | PAK2    | 5 | 26 | 5 | 14 | 16.71  | cell death;cell organization and biogenesis;cellular component movement;metabolic process;regulation of biological process;response to stimulus        |
| O95340 | bifunctional 3'-phosphoadenosine 5'-phosphosulfate synthase 2 [OS=Homo sapiens]                  | PAPSS 2 | 7 | 85 | 7 | 14 | 32.162 | coagulation;metabolic process                                                                                                                          |
| Q99497 | protein/nucleic acid deglycase DJ-1 [OS=Homo sapiens]                                            | PARK7   | 6 | 49 | 6 | 46 | 21.783 | cell communication;cell organization and biogenesis;defense response;metabolic process;regulation of biological process;response to stimulus;transport |
| P09874 | Poly [ADP-ribose] polymerase 1 [OS=Homo sapiens]                                                 | PARP1   | 6 | 51 | 6 | 7  | 24.494 | cell death;cell differentiation;cell organization and biogenesis;metabolic process;regulation of biological process;response to stimulus               |
| P08559 | Pyruvate dehydrogenase E1 component subunit alpha, somatic form, mitochondrial [OS=Homo sapiens] | PDHA1   | 4 | 39 | 4 | 11 | 18.638 | metabolic process;regulation of biological process                                                                                                     |
| P11177 | Pyruvate dehydrogenase E1 component subunit beta, mitochondrial [OS=Homo sapiens]                | PDHB    | 6 | 69 | 6 | 22 | 30.202 | metabolic process;regulation of biological process                                                                                                     |
| Q14554 | Protein disulfide-isomerase A5 [OS=Homo sapiens]                                                 | PDIA5   | 4 | 23 | 4 | 10 | 13.463 | cellular homeostasis;metabolic process;regulation of biological process;response to stimulus                                                           |
| P16284 | Platelet endothelial cell adhesion molecule [OS=Homo sapiens]                                    | PECAM 1 | 7 | 77 | 7 | 14 | 34.047 | cell organization and biogenesis;cellular component movement;regulation of biological process;response to stimulus;transport                           |

|          |                                                                      |                  |    |     |    |    |         |                                                                                                                                                                                                                      |
|----------|----------------------------------------------------------------------|------------------|----|-----|----|----|---------|----------------------------------------------------------------------------------------------------------------------------------------------------------------------------------------------------------------------|
| P12955   | xaa-Pro dipeptidase [OS=Homo sapiens]                                | PEPD             | 2  | 35  | 2  | 4  | 8.018   | metabolic process                                                                                                                                                                                                    |
| P17858-1 | ATP-dependent 6-phosphofructokinase, liver type [OS=Homo sapiens]    | PFKL             | 4  | 100 | 2  | 7  | 31.944  | cell organization and biogenesis;metabolic process;regulation of biological process;response to stimulus;transport                                                                                                   |
| Q01813   | ATP-dependent 6-phosphofructokinase, platelet type [OS=Homo sapiens] | PFKP             | 19 | 321 | 17 | 29 | 119.994 | metabolic process                                                                                                                                                                                                    |
| P35080-2 | Isoform IIb of Profilin-2 [OS=Homo sapiens]                          | PFN2             | 3  | 50  | 3  | 26 | 19.509  | cell organization and biogenesis;regulation of biological process                                                                                                                                                    |
| P18669   | Phosphoglycerate mutase 1 [OS=Homo sapiens]                          | PGAM1; LOC643576 | 5  | 58  | 5  | 26 | 26.652  | metabolic process;regulation of biological process;transport                                                                                                                                                         |
| Q95336   | 6-phosphogluconolactonase [OS=Homo sapiens]                          | PGLS             | 6  | 68  | 6  | 34 | 25.338  | metabolic process                                                                                                                                                                                                    |
| Q96G03   | Phosphoglucomutase-2 [OS=Homo sapiens]                               | PGM2             | 3  | 36  | 2  | 7  | 14.683  | metabolic process;transport                                                                                                                                                                                          |
| Q6PCE3   | glucose 1,6-bisphosphate synthase [OS=Homo sapiens]                  | PGM2L1           | 6  | 51  | 6  | 10 | 18.964  | metabolic process                                                                                                                                                                                                    |
| Q99623   | Prohibitin-2 [OS=Homo sapiens]                                       | PHB2             | 11 | 164 | 11 | 42 | 74.149  | cell organization and biogenesis;metabolic process;regulation of biological process;response to stimulus;transport                                                                                                   |
| O60664-1 | Perilipin-3 [OS=Homo sapiens]                                        | PLIN3            | 5  | 31  | 5  | 18 | 26.583  | transport                                                                                                                                                                                                            |
| Q02809   | Procollagen-lysine,2-oxoglutarate 5-dioxygenase 1 [OS=Homo sapiens]  | PLOD1            | 2  | 10  | 2  | 4  | 9.28    | metabolic process;response to stimulus                                                                                                                                                                               |
| O60568   | Procollagen-lysine,2-oxoglutarate 5-dioxygenase 3 [OS=Homo sapiens]  | PLOD3            | 2  | 32  | 2  | 4  | 11.701  | cell organization and biogenesis;metabolic process;response to stimulus                                                                                                                                              |
| P29590   | Protein PML [OS=Homo sapiens]                                        | PML              | 6  | 27  | 6  | 10 | 26.218  | cell death;cell differentiation;cell organization and biogenesis;cellular component movement;cellular homeostasis;defense response;metabolic process;regulation of biological process;response to stimulus;transport |

|          |                                                                                                     |          |   |     |   |    |        |                                                                                                                                                               |
|----------|-----------------------------------------------------------------------------------------------------|----------|---|-----|---|----|--------|---------------------------------------------------------------------------------------------------------------------------------------------------------------|
| P00491   | purine nucleoside phosphorylase [OS=Homo sapiens]                                                   | PNP      | 5 | 103 | 5 | 21 | 29.711 | metabolic process;regulation of biological process;response to stimulus;transport                                                                             |
| Q8IY17-1 | Neuropathy target esterase [OS=Homo sapiens]                                                        | PNPLA6   | 4 | 47  | 4 | 5  | 18.904 | metabolic process                                                                                                                                             |
| Q9H488-1 | GDP-fucose protein O-fucosyltransferase 1 [OS=Homo sapiens]                                         | POFUT1   | 2 | 40  | 2 | 7  | 9.933  | metabolic process;regulation of biological process;response to stimulus                                                                                       |
| P49593   | Protein phosphatase 1F [OS=Homo sapiens]                                                            | PPM1F    | 4 | 98  | 4 | 14 | 24.272 | cell death;cell organization and biogenesis;metabolic process;regulation of biological process;response to stimulus                                           |
| P36873-1 | serine/threonine-protein phosphatase PP1-gamma catalytic subunit [OS=Homo sapiens]                  | PPP1C C  | 4 | 35  | 2 | 18 | 20.548 | cell differentiation;cell division;cell organization and biogenesis;metabolic process;regulation of biological process;response to stimulus                   |
| P62714   | serine/threonine-protein phosphatase 2A catalytic subunit beta isoform [OS=Homo sapiens]            | PPP2C B  | 4 | 36  | 4 | 18 | 19.018 | cell organization and biogenesis;metabolic process;regulation of biological process;response to stimulus                                                      |
| P30153   | serine/threonine-protein phosphatase 2A 65 kDa regulatory subunit A alpha isoform [OS=Homo sapiens] | PPP2R1 A | 9 | 87  | 9 | 20 | 50.644 | cell death;cell organization and biogenesis;metabolic process;regulation of biological process;response to stimulus                                           |
| O60831   | PRA1 family protein 2 [OS=Homo sapiens]                                                             | PRAF2    | 2 | 21  | 2 | 12 | 10.283 | transport                                                                                                                                                     |
| P30048   | Thioredoxin-dependent peroxide reductase, mitochondrial [OS=Homo sapiens]                           | PRDX3    | 2 | 29  | 2 | 10 | 10.072 | cell death;cell differentiation;cell organization and biogenesis;cellular homeostasis;metabolic process;regulation of biological process;response to stimulus |
| P30044-1 | Peroxisome oxidoreductin-5, mitochondrial [OS=Homo sapiens]                                         | PRDX5    | 6 | 76  | 6 | 36 | 23.842 | cell death;cellular homeostasis;defense response;metabolic process;regulation of biological process;response to stimulus                                      |
| Q9UMS4   | Pre-mRNA-processing factor 19 [OS=Homo sapiens]                                                     | PRPF19   | 2 | 34  | 2 | 5  | 11.004 | cell organization and biogenesis;cell proliferation;metabolic process;regulation of biological process;response to stimulus                                   |

|          |                                                                   |            |    |     |    |    |        |                                                                                                                                         |
|----------|-------------------------------------------------------------------|------------|----|-----|----|----|--------|-----------------------------------------------------------------------------------------------------------------------------------------|
| Q43172-1 | U4/U6 small nuclear ribonucleoprotein Prp4 [OS=Homo sapiens]      | PRPF4      | 2  | 12  | 2  | 6  | 9.526  | metabolic process                                                                                                                       |
| Q94906-1 | Pre-mRNA-processing factor 6 [OS=Homo sapiens]                    | PRPF6      | 5  | 46  | 5  | 6  | 18.624 | cell organization and biogenesis;metabolic process;regulation of biological process                                                     |
| Q6P2Q9   | Pre-mRNA-processing-splicing factor 8 [OS=Homo sapiens]           | PRPF8      | 9  | 88  | 9  | 4  | 39.331 | cell organization and biogenesis;metabolic process;response to stimulus                                                                 |
| P25789   | Proteasome subunit alpha type-4 [OS=Homo sapiens]                 | PSMA4      | 4  | 44  | 4  | 18 | 16.736 | metabolic process;regulation of biological process;response to stimulus;transport                                                       |
| O14818-1 | Proteasome subunit alpha type-7 [OS=Homo sapiens]                 | PSMA7      | 3  | 58  | 3  | 14 | 17.679 | metabolic process;regulation of biological process;response to stimulus;transport                                                       |
| P28070   | Proteasome subunit beta type-4 [OS=Homo sapiens]                  | PSMB4      | 3  | 27  | 3  | 15 | 10.841 | metabolic process;regulation of biological process;response to stimulus;transport                                                       |
| P62191   | 26S proteasome regulatory subunit 4 [OS=Homo sapiens]             | PSMC1      | 6  | 80  | 5  | 19 | 27.305 | metabolic process;regulation of biological process;response to stimulus;transport                                                       |
| P17980   | 26S proteasome regulatory subunit 6A [OS=Homo sapiens]            | PSMC3      | 10 | 102 | 10 | 28 | 41.944 | metabolic process;regulation of biological process;response to stimulus;transport                                                       |
| P43686   | 26S proteasome regulatory subunit 6B [OS=Homo sapiens]            | PSMC4      | 6  | 48  | 6  | 17 | 25.599 | metabolic process;regulation of biological process;response to stimulus;transport                                                       |
| P62333   | 26S proteasome regulatory subunit 10B [OS=Homo sapiens]           | PSMC6      | 3  | 38  | 3  | 10 | 14.904 | cell organization and biogenesis;metabolic process;regulation of biological process;response to stimulus;transport                      |
| O00231   | 26S proteasome non-ATPase regulatory subunit 11 [OS=Homo sapiens] | PSMD1<br>1 | 5  | 33  | 5  | 15 | 19.531 | cell differentiation;cell organization and biogenesis;metabolic process;regulation of biological process;response to stimulus;transport |
| Q9UNM6   | 26S proteasome non-ATPase regulatory subunit 13 [OS=Homo sapiens] | PSMD1<br>3 | 4  | 34  | 4  | 9  | 11.47  | cell organization and biogenesis;metabolic process;regulation of biological                                                             |

|          |                                                                   |                 |   |    |   |    |        |                                                                                                                       |
|----------|-------------------------------------------------------------------|-----------------|---|----|---|----|--------|-----------------------------------------------------------------------------------------------------------------------|
|          |                                                                   |                 |   |    |   |    |        | process;response to stimulus;transport                                                                                |
| O00487   | 26S proteasome non-ATPase regulatory subunit 14 [OS=Homo sapiens] | PSMD1<br>4      | 4 | 24 | 4 | 20 | 11.895 | metabolic process;regulation of biological process;response to stimulus;transport                                     |
| Q13200   | 26S proteasome non-ATPase regulatory subunit 2 [OS=Homo sapiens]  | PSMD2           | 8 | 67 | 8 | 10 | 39.613 | metabolic process;regulation of biological process;response to stimulus;transport                                     |
| O43242   | 26S proteasome non-ATPase regulatory subunit 3 [OS=Homo sapiens]  | PSMD3           | 7 | 70 | 7 | 16 | 27.884 | metabolic process;regulation of biological process;response to stimulus;transport                                     |
| P55036-1 | 26S proteasome non-ATPase regulatory subunit 4 [OS=Homo sapiens]  | PSMD4           | 3 | 22 | 3 | 13 | 8.88   | cell organization and biogenesis;metabolic process;regulation of biological process;response to stimulus;transport    |
| Q16401   | 26S proteasome non-ATPase regulatory subunit 5 [OS=Homo sapiens]  | PSMD5           | 2 | 15 | 2 | 5  | 6.049  | cell organization and biogenesis;metabolic process;regulation of biological process;response to stimulus;transport    |
| Q15008   | 26S proteasome non-ATPase regulatory subunit 6 [OS=Homo sapiens]  | PSMD6           | 3 | 18 | 3 | 9  | 10.342 | metabolic process;regulation of biological process;response to stimulus;transport                                     |
| Q92530   | proteasome inhibitor PI31 subunit [OS=Homo sapiens]               | PSMF1           | 3 | 12 | 3 | 15 | 9.965  | metabolic process;regulation of biological process;response to stimulus;transport                                     |
| Q6NZI2-1 | caveolae-associated protein 1 [OS=Homo sapiens]                   | PTRF;<br>CAVIN1 | 4 | 28 | 4 | 16 | 16.132 | metabolic process;regulation of biological process                                                                    |
| Q9Y3E5   | Peptidyl-tRNA hydrolase 2, mitochondrial [OS=Homo sapiens]        | PTRH2           | 2 | 27 | 2 | 19 | 11.23  | cell death;regulation of biological process                                                                           |
| Q9UHX1-1 | poly(U)-binding-splicing factor PUF60 [OS=Homo sapiens]           | PUF60           | 2 | 17 | 2 | 8  | 8.244  | cell death;cellular homeostasis;metabolic process;regulation of biological process                                    |
| P47897   | glutamine--tRNA ligase [OS=Homo sapiens]                          | QARS            | 7 | 60 | 7 | 12 | 25.47  | metabolic process;regulation of biological process                                                                    |
| P61026   | ras-related protein rab-10 [OS=Homo sapiens]                      | RAB10           | 3 | 72 | 1 | 17 | 19.93  | cell differentiation;cell organization and biogenesis;regulation of biological process;response to stimulus;transport |

|          |                                                      |          |   |    |   |    |        |                                                                                                                                         |
|----------|------------------------------------------------------|----------|---|----|---|----|--------|-----------------------------------------------------------------------------------------------------------------------------------------|
| P62491-1 | Ras-related protein Rab-11A<br>[OS=Homo sapiens]     | RAB11A   | 2 | 44 | 2 | 10 | 10.353 | cell organization and biogenesis;metabolic process;regulation of biological process;response to stimulus;transport                      |
| P61019-1 | Ras-related protein Rab-2A<br>[OS=Homo sapiens]      | RAB2A    | 4 | 55 | 4 | 25 | 21.786 | cell organization and biogenesis;metabolic process;regulation of biological process;response to stimulus;transport                      |
| P51148   | Ras-related protein Rab-5C<br>[OS=Homo sapiens]      | RAB5C    | 5 | 80 | 4 | 35 | 30.094 | regulation of biological process;response to stimulus;transport                                                                         |
| P51149   | ras-related protein Rab-7a<br>[OS=Homo sapiens]      | RAB7A    | 4 | 81 | 4 | 22 | 28.085 | cell organization and biogenesis;cellular homeostasis;metabolic process;regulation of biological process;response to stimulus;transport |
| Q92878   | DNA repair protein Rad50<br>[OS=Homo sapiens]        | RAD50    | 5 | 40 | 5 | 4  | 14.101 | cell organization and biogenesis;metabolic process;regulation of biological process;response to stimulus                                |
| P11233   | Ras-related protein Ral-A<br>[OS=Homo sapiens]       | RALA     | 3 | 33 | 3 | 11 | 13.875 | cell division;cell organization and biogenesis;regulation of biological process;response to stimulus;transport                          |
| Q9UKM9-1 | RNA-binding protein Raly<br>[OS=Homo sapiens]        | RALY     | 3 | 46 | 3 | 9  | 12.838 | metabolic process;regulation of biological process                                                                                      |
| P46060   | Ran GTPase-activating protein 1<br>[OS=Homo sapiens] | RANGA P1 | 2 | 29 | 2 | 4  | 10.147 | cell organization and biogenesis;metabolic process;regulation of biological process;response to stimulus                                |
| P61224-1 | Ras-related protein Rap-1b<br>[OS=Homo sapiens]      | RAP1B    | 4 | 68 | 3 | 19 | 21.985 | cell organization and biogenesis;cell proliferation;regulation of biological process;response to stimulus;transport                     |
| P61225   | ras-related protein Rap-2b<br>[OS=Homo sapiens]      | RAP2B    | 2 | 41 | 2 | 13 | 10.78  | cell organization and biogenesis;regulation of biological process;response to stimulus;transport                                        |

|          |                                                 |                          |   |     |   |    |        |                                                                                                                                       |
|----------|-------------------------------------------------|--------------------------|---|-----|---|----|--------|---------------------------------------------------------------------------------------------------------------------------------------|
| Q96PK6-1 | RNA-binding protein 14<br>[OS=Homo sapiens]     | RBM14;<br>RBM14-<br>RBM4 | 2 | 21  | 2 | 5  | 6.87   | cell organization and<br>biogenesis;defense<br>response;metabolic<br>process;regulation of biological<br>process;response to stimulus |
| P84098   | 60S ribosomal protein L19<br>[OS=Homo sapiens]  | RPL19                    | 2 | 28  | 2 | 13 | 9.714  | cell organization and<br>biogenesis;metabolic<br>process;transport                                                                    |
| P46778   | 60S ribosomal protein L21<br>[OS=Homo sapiens]  | RPL21                    | 3 | 32  | 3 | 28 | 15.186 | cell organization and<br>biogenesis;metabolic<br>process;transport                                                                    |
| P46779   | 60S ribosomal protein L28<br>[OS=Homo sapiens]  | RPL28                    | 3 | 37  | 3 | 27 | 11.605 | cell organization and<br>biogenesis;metabolic<br>process;regulation of biological<br>process;transport                                |
| P39023   | 60S ribosomal protein L3<br>[OS=Homo sapiens]   | RPL3                     | 6 | 105 | 6 | 18 | 36.542 | cell organization and<br>biogenesis;metabolic<br>process;response to<br>stimulus;transport                                            |
| P62910   | 60S ribosomal protein L32<br>[OS=Homo sapiens]  | RPL32                    | 5 | 39  | 5 | 42 | 19.528 | cell organization and<br>biogenesis;metabolic<br>process;response to<br>stimulus;transport                                            |
| P49207   | 60S ribosomal protein L34<br>[OS=Homo sapiens]  | RPL34                    | 2 | 59  | 2 | 13 | 10.187 | cell organization and<br>biogenesis;metabolic<br>process;transport                                                                    |
| P18077   | 60S ribosomal protein L35a<br>[OS=Homo sapiens] | RPL35A                   | 3 | 17  | 3 | 14 | 13.336 | cell organization and<br>biogenesis;metabolic<br>process;transport                                                                    |
| P63173   | 60s ribosomal protein l38<br>[OS=Homo sapiens]  | RPL38                    | 4 | 29  | 4 | 50 | 14.067 | cell organization and<br>biogenesis;metabolic<br>process;regulation of biological<br>process;transport                                |
| P46777   | 60S ribosomal protein L5<br>[OS=Homo sapiens]   | RPL5                     | 7 | 150 | 7 | 29 | 44.343 | cell organization and<br>biogenesis;metabolic<br>process;regulation of biological<br>process;transport                                |
| P62917   | 60S ribosomal protein L8<br>[OS=Homo sapiens]   | RPL8                     | 5 | 71  | 5 | 22 | 25.443 | cell organization and<br>biogenesis;metabolic<br>process;response to<br>stimulus;transport                                            |

|          |                                                                                            |                                     |   |     |   |    |        |                                                                                                                                                                             |
|----------|--------------------------------------------------------------------------------------------|-------------------------------------|---|-----|---|----|--------|-----------------------------------------------------------------------------------------------------------------------------------------------------------------------------|
| P32969   | 60S ribosomal protein L9<br>[OS=Homo sapiens]                                              | RPL9                                | 5 | 124 | 5 | 40 | 24.721 | cell organization and biogenesis;metabolic process;transport                                                                                                                |
| P04844-1 | Dolichyl-diphosphooligosaccharide--protein glycosyltransferase subunit 2 [OS=Homo sapiens] | RPN2                                | 5 | 102 | 5 | 11 | 26.222 | metabolic process;response to stimulus                                                                                                                                      |
| Q9NQG5   | regulation of nuclear pre-mRNA domain-containing protein 1B<br>[OS=Homo sapiens]           | RPRD1<br>B                          | 3 | 36  | 3 | 14 | 13.411 | metabolic process;regulation of biological process                                                                                                                          |
| P62277   | 40S ribosomal protein S13<br>[OS=Homo sapiens]                                             | RPS13                               | 5 | 67  | 5 | 30 | 18.254 | cell organization and biogenesis;metabolic process;regulation of biological process;transport                                                                               |
| P08708   | 40S ribosomal protein S17<br>[OS=Homo sapiens]                                             | RPS17;<br>RPS17L                    | 3 | 27  | 3 | 40 | 10.947 | cell organization and biogenesis;metabolic process;transport                                                                                                                |
| P62269   | 40S ribosomal protein S18<br>[OS=Homo sapiens]                                             | RPS18                               | 2 | 36  | 2 | 11 | 10.496 | cell organization and biogenesis;metabolic process;transport                                                                                                                |
| P60866   | 40S ribosomal protein S20<br>[OS=Homo sapiens]                                             | RPS20                               | 4 | 66  | 4 | 29 | 23.442 | cell organization and biogenesis;metabolic process;transport                                                                                                                |
| P62847-1 | 40S ribosomal protein S24<br>[OS=Homo sapiens]                                             | RPS24                               | 4 | 63  | 4 | 35 | 22.684 | cell organization and biogenesis;metabolic process;transport                                                                                                                |
| P62854   | 40S ribosomal protein S26<br>[OS=Homo sapiens]                                             | RPS26;<br>LOC101929876;<br>RPS26P25 | 3 | 66  | 3 | 34 | 16.111 | cell organization and biogenesis;metabolic process;regulation of biological process;transport                                                                               |
| P62979   | Ubiquitin-40S ribosomal protein S27a [OS=Homo sapiens]                                     | RPS27A                              | 9 | 550 | 2 | 60 | 71.201 | cell communication;cell organization and biogenesis;cellular homeostasis;defense response;metabolic process;regulation of biological process;response to stimulus;transport |
| P46782   | 40S ribosomal protein S5<br>[OS=Homo sapiens]                                              | RPS5                                | 4 | 63  | 4 | 27 | 32.472 | cell organization and biogenesis;metabolic process;regulation of biological process;transport                                                                               |



|          |                                                                           |         |   |     |   |    |        |                                                                                                                           |
|----------|---------------------------------------------------------------------------|---------|---|-----|---|----|--------|---------------------------------------------------------------------------------------------------------------------------|
| O76021   | Ribosomal L1 domain-containing protein 1 [OS=Homo sapiens]                | RSL1D1  | 4 | 28  | 4 | 11 | 13.41  | cell differentiation;metabolic process;regulation of biological process                                                   |
| Q9Y265   | RuvB-like 1 [OS=Homo sapiens]                                             | RUVBL1  | 4 | 35  | 4 | 13 | 24.299 | cell division;cell organization and biogenesis;metabolic process;regulation of biological process;response to stimulus    |
| Q9Y230   | RuvB-like 2 [OS=Homo sapiens]                                             | RUVBL2  | 9 | 156 | 9 | 24 | 48.597 | cell organization and biogenesis;metabolic process;regulation of biological process;response to stimulus                  |
| P60903   | Protein S100-A10 [OS=Homo sapiens]                                        | S100A10 | 2 | 35  | 2 | 28 | 10.82  | cell organization and biogenesis;regulation of biological process;response to stimulus                                    |
| O75396   | Vesicle-trafficking protein SEC22b [OS=Homo sapiens]                      | SEC22B  | 3 | 38  | 3 | 21 | 17.174 | cell organization and biogenesis;regulation of biological process;transport                                               |
| Q15436   | protein transport protein Sec23A [OS=Homo sapiens]                        | SEC23A  | 9 | 109 | 9 | 16 | 46.715 | cell organization and biogenesis;transport                                                                                |
| P53992   | Protein transport protein sec24c [OS=Homo sapiens]                        | SEC24C  | 5 | 29  | 5 | 6  | 20.303 | cell organization and biogenesis;regulation of biological process;transport                                               |
| P61619   | Protein transport protein Sec61 subunit alpha isoform 1 [OS=Homo sapiens] | SEC61A1 | 3 | 39  | 3 | 5  | 14.945 | cell growth;cell organization and biogenesis;response to stimulus;transport                                               |
| Q15019   | septin-2 [OS=Homo sapiens]                                                | SEPT2   | 6 | 128 | 5 | 22 | 37.314 | cell differentiation;cell division;cell organization and biogenesis;regulation of biological process;response to stimulus |
| Q9UHD8-1 | Septin-9 [OS=Homo sapiens]                                                | SEPT9   | 5 | 55  | 4 | 9  | 24.754 | cell division;cell organization and biogenesis;regulation of biological process                                           |
| O75533-1 | splicing factor 3B subunit 1 [OS=Homo sapiens]                            | SF3B1   | 5 | 58  | 5 | 4  | 20.06  | cell organization and biogenesis;metabolic process;regulation of biological process;response to stimulus                  |
| Q15393-1 | Splicing factor 3B subunit 3 [OS=Homo sapiens]                            | SF3B3   | 2 | 27  | 2 | 2  | 10.51  | cell organization and biogenesis;metabolic process;regulation of biological process                                       |

|          |                                                                         |          |    |     |    |    |         |                                                                                                                                                |
|----------|-------------------------------------------------------------------------|----------|----|-----|----|----|---------|------------------------------------------------------------------------------------------------------------------------------------------------|
| P23246-1 | splicing factor, proline- and glutamine-rich [OS=Homo sapiens]          | SFPQ     | 5  | 33  | 5  | 9  | 22.56   | cell organization and biogenesis;defense response;metabolic process;regulation of biological process;response to stimulus                      |
| Q9H9B4   | Sideroflexin-1 [OS=Homo sapiens]                                        | SFXN1    | 3  | 63  | 3  | 11 | 21.712  | cell differentiation;transport                                                                                                                 |
| Q9BWM7   | Sideroflexin-3 [OS=Homo sapiens]                                        | SFXN3    | 4  | 71  | 4  | 18 | 20.592  | transport                                                                                                                                      |
| Q02978   | Mitochondrial 2-oxoglutarate/malate carrier protein [OS=Homo sapiens]   | SLC25A11 | 3  | 44  | 3  | 15 | 16.51   | metabolic process;transport                                                                                                                    |
| Q6NUK1   | Calcium-binding mitochondrial carrier protein SCaMC-1 [OS=Homo sapiens] | SLC25A24 | 4  | 32  | 4  | 9  | 16.206  | regulation of biological process;response to stimulus;transport                                                                                |
| P12236   | ADP/ATP translocase 3 [OS=Homo sapiens]                                 | SLC25A6  | 9  | 321 | 2  | 35 | 53.298  | cell death;cell organization and biogenesis;regulation of biological process;response to stimulus;transport                                    |
| O95347-1 | structural maintenance of chromosomes protein 2 [OS=Homo sapiens]       | SMC2     | 2  | 16  | 2  | 2  | 6.309   | cell division;cell organization and biogenesis;metabolic process;regulation of biological process                                              |
| O75643-1 | U5 small nuclear ribonucleoprotein 200 kDa helicase [OS=Homo sapiens]   | SNRNP200 | 8  | 94  | 8  | 5  | 40.716  | cell differentiation;cell organization and biogenesis;metabolic process                                                                        |
| Q13596   | Sorting nexin-1 [OS=Homo sapiens]                                       | SNX1     | 2  | 26  | 1  | 3  | 10.142  | cell organization and biogenesis;metabolic process;regulation of biological process;transport                                                  |
| Q9UNH7-1 | Sorting nexin-6 [OS=Homo sapiens]                                       | SNX6     | 3  | 17  | 3  | 9  | 11.681  | cell organization and biogenesis;regulation of biological process;transport                                                                    |
| Q13813   | Spectrin alpha chain, non-erythrocytic 1 [OS=Homo sapiens]              | SPTAN1   | 7  | 44  | 7  | 4  | 32.09   | cell organization and biogenesis;cellular component movement;metabolic process;regulation of biological process;response to stimulus;transport |
| Q01082-1 | Spectrin beta chain, non-erythrocytic 1 [OS=Homo sapiens]               | SPTBN1   | 22 | 218 | 22 | 13 | 101.245 | cell organization and biogenesis;cellular component movement;metabolic                                                                         |

|          |                                                                                                |             |   |    |   |    |        |                                                                                                                                                                         |
|----------|------------------------------------------------------------------------------------------------|-------------|---|----|---|----|--------|-------------------------------------------------------------------------------------------------------------------------------------------------------------------------|
|          |                                                                                                |             |   |    |   |    |        | process;regulation of biological process;response to stimulus;transport                                                                                                 |
| Q9Y6N5   | Sulfide:quinone oxidoreductase, mitochondrial [OS=Homo sapiens]                                | SQRDL; SQOR | 6 | 61 | 6 | 14 | 29.073 | metabolic process                                                                                                                                                       |
| P19623   | spermidine synthase [OS=Homo sapiens]                                                          | SRM         | 5 | 60 | 5 | 20 | 19.628 | metabolic process                                                                                                                                                       |
| P37108   | Signal recognition particle 14 kDa protein [OS=Homo sapiens]                                   | SRP14       | 4 | 24 | 4 | 40 | 31.032 | cell organization and biogenesis;response to stimulus;transport                                                                                                         |
| Q9UHB9   | Signal recognition particle subunit SRP68 [OS=Homo sapiens]                                    | SRP68       | 3 | 63 | 3 | 6  | 15.869 | cell organization and biogenesis;response to stimulus;transport                                                                                                         |
| Q08945   | FACT complex subunit SSRP1 [OS=Homo sapiens]                                                   | SSRP1       | 4 | 41 | 4 | 7  | 22.872 | metabolic process;regulation of biological process;response to stimulus                                                                                                 |
| P42224-1 | Signal transducer and activator of transcription 1-alpha/beta [OS=Homo sapiens]                | STAT1       | 5 | 63 | 5 | 10 | 27.011 | cell death;cell differentiation;cell proliferation;cellular component movement;defense response;metabolic process;regulation of biological process;response to stimulus |
| P31948   | stress-induced-phosphoprotein 1 [OS=Homo sapiens]                                              | STIP1       | 6 | 61 | 6 | 14 | 27.677 | response to stimulus                                                                                                                                                    |
| Q8TCJ2   | Dolichyl-diphosphooligosaccharide--protein glycosyltransferase subunit STT3B [OS=Homo sapiens] | STT3B       | 4 | 36 | 4 | 5  | 15.307 | metabolic process;response to stimulus                                                                                                                                  |
| P53597   | Succinate--CoA ligase [ADP/GDP-forming] subunit alpha, mitochondrial [OS=Homo sapiens]         | SUCLG 1     | 2 | 36 | 2 | 9  | 9.71   | metabolic process                                                                                                                                                       |
| Q96199-1 | Succinate--CoA ligase [GDP-forming] subunit beta, mitochondrial [OS=Homo sapiens]              | SUCLG 2     | 3 | 22 | 3 | 11 | 14.595 | metabolic process                                                                                                                                                       |
| Q9Y5B9   | FACT complex subunit SPT16 [OS=Homo sapiens]                                                   | SUPT16 H    | 7 | 68 | 7 | 8  | 28.818 | cell organization and biogenesis;metabolic process;regulation of biological process;response to stimulus                                                                |

|          |                                                                   |         |   |     |   |    |        |                                                                                                                                                                 |
|----------|-------------------------------------------------------------------|---------|---|-----|---|----|--------|-----------------------------------------------------------------------------------------------------------------------------------------------------------------|
| Q9UH65   | Switch-associated protein 70<br>[OS=Homo sapiens]                 | SWAP70  | 2 | 31  | 2 | 3  | 8.855  | cell organization and biogenesis;cellular homeostasis;metabolic process;regulation of biological process                                                        |
| O60506   | Heterogeneous nuclear ribonucleoprotein Q [OS=Homo sapiens]       | SYNCRIP | 8 | 101 | 5 | 15 | 31.724 | cell differentiation;metabolic process;regulation of biological process;response to stimulus                                                                    |
| P26639-1 | Threonine--tRNA ligase, cytoplasmic [OS=Homo sapiens]             | TARS    | 8 | 71  | 8 | 14 | 35.619 | metabolic process                                                                                                                                               |
| P07996   | thrombospondin-1 [OS=Homo sapiens]                                | THBS1   | 4 | 22  | 4 | 5  | 12.22  | cell organization and biogenesis;cellular component movement;defense response;metabolic process;regulation of biological process;response to stimulus;transport |
| P29401   | Transketolase [OS=Homo sapiens]                                   | TKT     | 3 | 49  | 3 | 8  | 20.505 | metabolic process;regulation of biological process                                                                                                              |
| Q92544   | Transmembrane 9 superfamily member 4 [OS=Homo sapiens]            | TM9SF4  | 2 | 16  | 2 | 4  | 7.315  | cell organization and biogenesis;cellular homeostasis;regulation of biological process;response to stimulus;transport                                           |
| Q13445   | Transmembrane emp24 domain-containing protein 1 [OS=Homo sapiens] | TMED1   | 2 | 14  | 2 | 12 | 13.983 | cell communication;regulation of biological process;response to stimulus;transport                                                                              |
| Q86WV6   | Stimulator of interferon genes protein [OS=Homo sapiens]          | TMEM173 | 5 | 111 | 5 | 20 | 48.171 | cell death;defense response;regulation of biological process;response to stimulus;transport                                                                     |
| Q92973-1 | transportin-1 [OS=Homo sapiens]                                   | TNPO1   | 9 | 71  | 9 | 12 | 38.835 | cellular component movement;regulation of biological process;transport                                                                                          |
| P11387   | DNA topoisomerase 1 [OS=Homo sapiens]                             | TOP1    | 6 | 92  | 6 | 8  | 31.84  | cell death;cell division;cell organization and biogenesis;metabolic process;regulation of biological process;response to stimulus                               |
| Q02880   | DNA topoisomerase 2-beta [OS=Homo sapiens]                        | TOP2B   | 8 | 95  | 8 | 6  | 40.381 | cell organization and biogenesis;cellular component                                                                                                             |

|          |                                                                    |                         |    |      |   |    |         |                                                                                                                           |
|----------|--------------------------------------------------------------------|-------------------------|----|------|---|----|---------|---------------------------------------------------------------------------------------------------------------------------|
|          |                                                                    |                         |    |      |   |    |         | movement;metabolic process;regulation of biological process                                                               |
| Q14258   | E3 ubiquitin/ISG15 ligase TRIM25 [OS=Homo sapiens]                 | TRIM25                  | 5  | 48   | 5 | 9  | 25.203  | defense response;metabolic process;regulation of biological process;response to stimulus                                  |
| Q13263   | Transcription intermediary factor 1-beta [OS=Homo sapiens]         | TRIM28                  | 8  | 83   | 8 | 15 | 34.512  | cell organization and biogenesis;defense response;metabolic process;regulation of biological process;response to stimulus |
| Q9BQE3   | Tubulin alpha-1C chain [OS=Homo sapiens]                           | TUBA1 C                 | 20 | 2147 | 3 | 62 | 253.702 | cell division;cell organization and biogenesis;transport                                                                  |
| Q13509   | tubulin beta-3 chain [OS=Homo sapiens]                             | TUBB3                   | 19 | 2010 | 2 | 45 | 264.623 | cell organization and biogenesis;cellular component movement                                                              |
| P04350   | Tubulin beta-4A chain [OS=Homo sapiens]                            | TUBB4 A                 | 26 | 2013 | 3 | 69 | 293.924 | cell organization and biogenesis;regulation of biological process                                                         |
| Q12792-2 | Twinfilin-1 [OS=Homo sapiens]                                      | TWF1                    | 3  | 27   | 3 | 11 | 12.988  | cell organization and biogenesis;regulation of biological process                                                         |
| Q6IBS0   | Twinfilin-2 [OS=Homo sapiens]                                      | TWF2                    | 2  | 36   | 2 | 10 | 17.497  | cell organization and biogenesis;regulation of biological process;response to stimulus                                    |
| Q16222-1 | UDP-N-acetylhexosamine pyrophosphorylase [OS=Homo sapiens]         | UAP1                    | 3  | 60   | 3 | 7  | 16.691  | metabolic process                                                                                                         |
| Q9UBT2   | SUMO-activating enzyme subunit 2 [OS=Homo sapiens]                 | UBA2                    | 6  | 46   | 6 | 12 | 25.263  | metabolic process;regulation of biological process                                                                        |
| Q13404   | Ubiquitin-conjugating enzyme E2 variant 1 [OS=Homo sapiens]        | UBE2V1 ; TMEM189-UBE2V1 | 4  | 20   | 4 | 27 | 12.783  | cell differentiation;metabolic process;regulation of biological process;response to stimulus                              |
| Q9H3U1   | Protein unc-45 homolog A [OS=Homo sapiens]                         | UNC45 A                 | 5  | 28   | 5 | 7  | 23.91   | cell differentiation;development;metabolic process                                                                        |
| P22695   | Cytochrome b-c1 complex subunit 2, mitochondrial [OS=Homo sapiens] | UQCRC 2                 | 9  | 96   | 9 | 26 | 47.904  | metabolic process;transport                                                                                               |

|          |                                                                                     |                |    |     |    |    |        |                                                                                                                               |
|----------|-------------------------------------------------------------------------------------|----------------|----|-----|----|----|--------|-------------------------------------------------------------------------------------------------------------------------------|
| O60763-1 | General vesicular transport factor p115 [OS=Homo sapiens]                           | USO1           | 6  | 69  | 6  | 9  | 25.172 | cell organization and biogenesis;metabolic process;transport                                                                  |
| Q14694   | Ubiquitin carboxyl-terminal hydrolase 10 [OS=Homo sapiens]                          | USP10          | 2  | 20  | 2  | 3  | 8.064  | metabolic process;regulation of biological process;response to stimulus                                                       |
| P45974-1 | Ubiquitin carboxyl-terminal hydrolase 5 [OS=Homo sapiens]                           | USP5           | 8  | 51  | 8  | 14 | 33.21  | metabolic process;regulation of biological process                                                                            |
| Q93008-1 | Isoform 2 of Probable ubiquitin carboxyl-terminal hydrolase FAF-X [OS=Homo sapiens] | USP9X          | 4  | 18  | 4  | 2  | 11.548 | cell division;cell growth;cellular component movement;metabolic process;regulation of biological process;response to stimulus |
| P46939   | Utrophin [OS=Homo sapiens]                                                          | UTRN           | 10 | 74  | 10 | 4  | 35.721 | cell organization and biogenesis;regulation of biological process;response to stimulus                                        |
| P26640   | Valine--tRNA ligase [OS=Homo sapiens]                                               | VAR5;<br>VAR52 | 6  | 24  | 6  | 7  | 20.586 | metabolic process;regulation of biological process                                                                            |
| P18206   | Vinculin [OS=Homo sapiens]                                                          | VCL            | 13 | 111 | 13 | 14 | 61.836 | cell growth;cell organization and biogenesis;cellular component movement;regulation of biological process;transport           |
| Q9Y277   | Voltage-dependent anion-selective channel protein 3 [OS=Homo sapiens]               | VDAC3          | 3  | 24  | 2  | 12 | 15.252 | cell communication;defense response;regulation of biological process;response to stimulus;transport                           |
| O75436-1 | Vacuolar protein sorting-associated protein 26A [OS=Homo sapiens]                   | VPS26A         | 2  | 15  | 2  | 9  | 7.735  | regulation of biological process;response to stimulus;transport                                                               |
| Q96QK1   | Vacuolar protein sorting-associated protein 35 [OS=Homo sapiens]                    | VPS35          | 8  | 83  | 8  | 10 | 30.047 | cell organization and biogenesis;regulation of biological process;response to stimulus;transport                              |
| P23381   | Tryptophan--tRNA ligase, cytoplasmic [OS=Homo sapiens]                              | WARS           | 3  | 28  | 3  | 10 | 11.966 | metabolic process;regulation of biological process                                                                            |
| O14980   | Exportin-1 [OS=Homo sapiens]                                                        | XPO1           | 10 | 103 | 10 | 11 | 46.747 | cell organization and biogenesis;regulation of biological process;response to stimulus;transport                              |
| Q9UIA9   | exportin-7 [OS=Homo sapiens]                                                        | XPO7           | 4  | 40  | 4  | 4  | 14.299 | transport                                                                                                                     |
| O43592   | Exportin-T [OS=Homo sapiens]                                                        | XPOT           | 3  | 20  | 3  | 4  | 11.284 | transport                                                                                                                     |

|          |                                                              |       |    |     |    |    |        |                                                                                                                                     |
|----------|--------------------------------------------------------------|-------|----|-----|----|----|--------|-------------------------------------------------------------------------------------------------------------------------------------|
| P12956   | X-ray repair cross-complementing protein 6 [OS=Homo sapiens] | XRCC6 | 15 | 173 | 15 | 31 | 70.545 | cell organization and biogenesis;defense response;metabolic process;regulation of biological process;response to stimulus;transport |
| P31946   | 14-3-3 protein beta/alpha [OS=Homo sapiens]                  | YWHAH | 5  | 163 | 2  | 27 | 21.855 | cell organization and biogenesis;metabolic process;regulation of biological process;response to stimulus;transport                  |
| Q04917   | 14-3-3 protein eta [OS=Homo sapiens]                         | YWHAH | 7  | 190 | 5  | 25 | 41.44  | cell organization and biogenesis;metabolic process;regulation of biological process;response to stimulus;transport                  |
| P63104-1 | 14-3-3 protein zeta/delta [OS=Homo sapiens]                  | YWHAZ | 7  | 207 | 5  | 29 | 57.138 | cell organization and biogenesis;metabolic process;regulation of biological process;response to stimulus;transport                  |

**Table S3: List of 131 proteins modified by only 2-CIHDyA in HLMVEC**

| Accession | Description                                                                        | Gene<br>Symbol | # Peptides | # PSMs | # Unique<br>Peptides | Coverage<br>[%] | Sum PEP<br>Score | Biological Process                                                                                                                  |
|-----------|------------------------------------------------------------------------------------|----------------|------------|--------|----------------------|-----------------|------------------|-------------------------------------------------------------------------------------------------------------------------------------|
| P09110    | 3-ketoacyl-CoA thiolase,<br>peroxisomal [OS=Homo sapiens]                          | ACAA1          | 3          | 22     | 3                    | 13              | 22.974           | other metabolic processes                                                                                                           |
| O00154    | Isoform 4 of Cytosolic acyl<br>coenzyme A thioester hydrolase<br>[OS=Homo sapiens] | ACOT7          | 6          | 75     | 6                    | 23              | 28.271           |                                                                                                                                     |
| O95573    | long-chain-fatty-acid--CoA ligase<br>3 [OS=Homo sapiens]                           | ACSL3          | 6          | 27     | 6                    | 9               | 21.406           | cell organization and<br>biogenesis;other metabolic<br>processes;transport;developmental<br>processes;other biological<br>processes |
| P35611    | Alpha-adducin [OS=Homo<br>sapiens]                                                 | ADD1           | 5          | 52     | 5                    | 10              | 18.85            | cell organization and<br>biogenesis;other biological<br>processes                                                                   |
| P11766    | alcohol dehydrogenase class-3<br>[OS=Homo sapiens]                                 | ADH5           | 2          | 19     | 2                    | 7               | 5.625            | protein metabolism;other metabolic<br>processes;stress response;other<br>biological processes                                       |
| P30566    | adenylosuccinate lyase<br>[OS=Homo sapiens]                                        | ADSL           | 2          | 48     | 2                    | 4               | 11.027           | other metabolic processes;stress<br>response;other biological processes                                                             |
| Q09666    | Neuroblast differentiation-<br>associated protein AHNAK<br>[OS=Homo sapiens]       | AHNAK          | 6          | 94     | 6                    | 3               | 27.183           | other biological processes                                                                                                          |
| P00568    | Adenylate kinase isoenzyme 1<br>[OS=Homo sapiens]                                  | AK1            | 2          | 27     | 2                    | 12              | 10.902           | other metabolic processes                                                                                                           |
| P54886    | delta-1-pyrroline-5-carboxylate<br>synthase [OS=Homo sapiens]                      | ALDH18A1       | 6          | 92     | 6                    | 8               | 31.567           | other metabolic processes                                                                                                           |
| P09525    | annexin A4 [OS=Homo sapiens]                                                       | ANXA4          | 4          | 28     | 3                    | 13              | 15.159           | signal transduction;other biological<br>processes                                                                                   |
| P20073    | Annexin A7 [OS=Homo sapiens]                                                       | ANXA7          | 2          | 22     | 2                    | 4               | 6.166            | cell organization and<br>biogenesis;other metabolic<br>processes;other biological<br>processes                                      |
| O43747    | AP-1 complex subunit gamma-1<br>[OS=Homo sapiens]                                  | AP1G1          | 3          | 22     | 3                    | 3               | 8.547            | cell organization and<br>biogenesis;transport;other biological<br>processes                                                         |
| O94973    | AP-2 complex subunit alpha-2<br>[OS=Homo sapiens]                                  | AP2A2          | 6          | 64     | 3                    | 6               | 26.076           | transport                                                                                                                           |
| O00203    | AP-3 complex subunit beta-1<br>[OS=Homo sapiens]                                   | AP3B1          | 3          | 23     | 3                    | 3               | 15.351           | cell organization and<br>biogenesis;protein metabolism;RNA<br>metabolism OR transcription;other                                     |



|        |                                                                 |         |   |    |   |    |        |                                                                                                                      |
|--------|-----------------------------------------------------------------|---------|---|----|---|----|--------|----------------------------------------------------------------------------------------------------------------------|
|        |                                                                 |         |   |    |   |    |        | metabolic processes;stress response;transport;developmental processes;signal transduction;other biological processes |
| Q9HDC9 | Adipocyte plasma membrane-associated protein [OS=Homo sapiens]  | APMAP   | 2 | 42 | 2 | 6  | 10.787 | other metabolic processes                                                                                            |
| P40616 | ADP-ribosylation factor-like protein 1 [OS=Homo sapiens]        | ARL1    | 3 | 37 | 3 | 19 | 13.498 | cell organization and biogenesis;other metabolic processes;transport;other biological processes                      |
| Q96BM9 | ADP-ribosylation factor-like protein 8A [OS=Homo sapiens]       | ARL8A   | 4 | 64 | 1 | 20 | 18.099 | cell cycle OR cell proliferation;transport;other biological processes                                                |
| Q92747 | Actin-related protein 2/3 complex subunit 1A [OS=Homo sapiens]  | ARPC1A  | 2 | 55 | 1 | 4  | 6.947  | cell organization and biogenesis                                                                                     |
| O15145 | Actin-related protein 2/3 complex subunit 3 [OS=Homo sapiens]   | ARPC3   | 3 | 53 | 3 | 16 | 17.182 | cell organization and biogenesis;other biological processes                                                          |
| Q6DD88 | Atlastin-3 [OS=Homo sapiens]                                    | ATL3    | 3 | 50 | 3 | 9  | 24.845 | cell organization and biogenesis;other biological processes                                                          |
| Q9HD20 | manganese-transporting ATPase 13A1 [OS=Homo sapiens]            | ATP13A1 | 3 | 29 | 3 | 3  | 12.426 | transport;other biological processes                                                                                 |
| P23634 | Plasma membrane calcium-transporting ATPase 4 [OS=Homo sapiens] | ATP2B4  | 7 | 48 | 7 | 7  | 29.056 | stress response;transport;developmental processes;other biological processes                                         |
| P36542 | ATP synthase subunit gamma, mitochondrial [OS=Homo sapiens]     | ATP5F1C | 4 | 29 | 4 | 13 | 16.924 | other metabolic processes;transport                                                                                  |
| P48047 | ATP synthase subunit O, mitochondrial [OS=Homo sapiens]         | ATP5PO  | 4 | 65 | 4 | 21 | 17.526 | other metabolic processes;transport                                                                                  |
| P51572 | B-cell receptor-associated protein 31 [OS=Homo sapiens]         | BCAP31  | 4 | 35 | 4 | 14 | 15.543 | cell organization and biogenesis;stress response;transport;signal transduction;other biological processes            |
| P53004 | Biliverdin reductase A [OS=Homo sapiens]                        | BLVRA   | 4 | 42 | 4 | 16 | 19.327 | other metabolic processes                                                                                            |

|        |                                                   |         |   |    |   |    |        |                                                                                                                                                                                                                                   |
|--------|---------------------------------------------------|---------|---|----|---|----|--------|-----------------------------------------------------------------------------------------------------------------------------------------------------------------------------------------------------------------------------------|
| P27824 | Calnexin [OS=Homo sapiens]                        | CANX    | 3 | 26 | 3 | 6  | 13.919 | stress response;transport;signal transduction;other biological processes                                                                                                                                                          |
| P04040 | catalase [OS=Homo sapiens]                        | CAT     | 4 | 34 | 4 | 9  | 23.855 | protein metabolism;other metabolic processes;stress response;developmental processes;other biological processes                                                                                                                   |
| Q6NZ12 | caveolae-associated protein 1 [OS=Homo sapiens]   | CAVIN1  | 4 | 19 | 4 | 11 | 16.343 | RNA metabolism OR transcription;other metabolic processes;transport;other biological processes                                                                                                                                    |
| P16152 | Carbonyl reductase [NADPH] 1 [OS=Homo sapiens]    | CBR1    | 6 | 51 | 6 | 30 | 28.538 | other metabolic processes;other biological processes                                                                                                                                                                              |
| P21964 | Catechol O-methyltransferase [OS=Homo sapiens]    | COMT    | 2 | 13 | 2 | 7  | 7.85   | other metabolic processes;stress response;other biological processes                                                                                                                                                              |
| Q9Y678 | Coatamer subunit gamma-1 [OS=Homo sapiens]        | COPG1   | 9 | 98 | 9 | 16 | 42.333 | transport;other biological processes                                                                                                                                                                                              |
| P19784 | casein kinase II subunit alpha' [OS=Homo sapiens] | CSNK2A2 | 2 | 34 | 1 | 4  | 7.308  | cell-cell signaling;cell cycle OR cell proliferation;protein metabolism;other metabolic processes;developmental processes;signal transduction;other biological processes                                                          |
| P56545 | c-terminal-binding protein 2 [OS=Homo sapiens]    | CTBP2   | 2 | 16 | 2 | 4  | 6.604  | cell-cell signaling;cell organization and biogenesis;transport;other biological processes                                                                                                                                         |
| P35222 | Catenin beta-1 [OS=Homo sapiens]                  | CTNNB1  | 5 | 52 | 3 | 7  | 21.891 | cell adhesion;cell-cell signaling;cell cycle OR cell proliferation;cell organization and biogenesis;protein metabolism;other metabolic processes;transport;developmental processes;signal transduction;other biological processes |
| O60716 | Catenin delta-1 [OS=Homo sapiens]                 | CTNND1  | 6 | 71 | 6 | 7  | 24.429 | cell adhesion;cell-cell signaling;cell organization and biogenesis;developmental processes;signal transduction;other biological processes                                                                                         |
| Q9UHQ9 | NADH-cytochrome b5 reductase 1 [OS=Homo sapiens]  | CYB5R1  | 3 | 71 | 3 | 9  | 11.109 | other metabolic processes;transport                                                                                                                                                                                               |

|        |                                                                            |        |   |     |   |    |        |                                                                                                                                          |
|--------|----------------------------------------------------------------------------|--------|---|-----|---|----|--------|------------------------------------------------------------------------------------------------------------------------------------------|
| Q9UBM7 | 7-dehydrocholesterol reductase [OS=Homo sapiens]                           | DHCR7  | 3 | 79  | 3 | 6  | 14.359 | other metabolic processes;other biological processes                                                                                     |
| Q14195 | Isoform LCRMP-4 of Dihydropyrimidinase-related protein 3 [OS=Homo sapiens] | DPYSL3 | 6 | 152 | 5 | 10 | 27.19  |                                                                                                                                          |
| P63167 | Dynein light chain 1, cytoplasmic [OS=Homo sapiens]                        | DYNLL1 | 2 | 18  | 2 | 33 | 6.839  | cell organization and biogenesis;other biological processes                                                                              |
| Q14152 | Eukaryotic translation initiation factor 3 subunit A [OS=Homo sapiens]     | EIF3A  | 8 | 98  | 8 | 5  | 32.857 | cell organization and biogenesis;protein metabolism;other metabolic processes;other biological processes                                 |
| Q15371 | Eukaryotic translation initiation factor 3 subunit D [OS=Homo sapiens]     | EIF3D  | 3 | 51  | 3 | 6  | 15.679 | cell organization and biogenesis;protein metabolism;other metabolic processes;other biological processes                                 |
| Q6P179 | Endoplasmic reticulum aminopeptidase 2 [OS=Homo sapiens]                   | ERAP2  | 4 | 53  | 4 | 4  | 16.112 | protein metabolism;other metabolic processes;signal transduction;other biological processes                                              |
| O75477 | erlin-1 [OS=Homo sapiens]                                                  | ERLIN1 | 5 | 96  | 2 | 16 | 25.842 |                                                                                                                                          |
| Q9BS26 | Endoplasmic reticulum resident protein 44 [OS=Homo sapiens]                | ERP44  | 4 | 37  | 3 | 9  | 14.152 | protein metabolism;other metabolic processes;stress response;other biological processes                                                  |
| P62495 | Eukaryotic peptide chain release factor subunit 1 [OS=Homo sapiens]        | ETF1   | 4 | 61  | 4 | 9  | 22.653 | cell organization and biogenesis;protein metabolism;RNA metabolism OR transcription;other metabolic processes;other biological processes |
| P38117 | electron transfer flavoprotein subunit beta [OS=Homo sapiens]              | ETFB   | 3 | 45  | 3 | 12 | 9.761  | other metabolic processes                                                                                                                |
| P22570 | NADPH:adrenodoxin oxidoreductase, mitochondrial [OS=Homo sapiens]          | FDXR   | 4 | 34  | 4 | 9  | 15.181 | other metabolic processes                                                                                                                |
| O75955 | Flotillin-1 [OS=Homo sapiens]                                              | FLOT1  | 2 | 27  | 2 | 5  | 6.764  | cell organization and biogenesis;stress response;transport;developmental processes;signal transduction;other biological processes        |
| P41250 | Glycine--tRNA ligase [OS=Homo sapiens]                                     | GARS1  | 4 | 29  | 4 | 5  | 14.713 | protein metabolism;RNA metabolism OR transcription;other metabolic processes                                                             |

|        |                                                                                    |          |   |    |   |    |        |                                                                                                                                                                                                       |
|--------|------------------------------------------------------------------------------------|----------|---|----|---|----|--------|-------------------------------------------------------------------------------------------------------------------------------------------------------------------------------------------------------|
| Q04446 | 1,4-alpha-glucan-branching enzyme [OS=Homo sapiens]                                | GBE1     | 3 | 35 | 3 | 5  | 8.395  | other metabolic processes;other biological processes                                                                                                                                                  |
| P57678 | Gem-associated protein 4 [OS=Homo sapiens]                                         | GEMIN4   | 2 | 17 | 2 | 1  | 8.142  | cell organization and biogenesis;RNA metabolism OR transcription;other metabolic processes                                                                                                            |
| Q06210 | glutamine--fructose-6-phosphate aminotransferase [isomerizing] 1 [OS=Homo sapiens] | GFPT1    | 7 | 79 | 7 | 13 | 24.928 | protein metabolism;other metabolic processes;other biological processes                                                                                                                               |
| Q8ND71 | GTPase IMAP family member 8 [OS=Homo sapiens]                                      | GIMAP8   | 2 | 19 | 2 | 4  | 7.168  | other biological processes                                                                                                                                                                            |
| P07203 | Glutathione peroxidase 1 [OS=Homo sapiens]                                         | GPX1     | 4 | 42 | 4 | 25 | 17.016 | cell cycle OR cell proliferation;cell organization and biogenesis;protein metabolism;other metabolic processes;stress response;developmental processes;signal transduction;other biological processes |
| P35914 | Hydroxymethylglutaryl-CoA lyase, mitochondrial [OS=Homo sapiens]                   | HMGCL    | 2 | 29 | 2 | 6  | 7.69   | cell organization and biogenesis;other metabolic processes;stress response;developmental processes;other biological processes                                                                         |
| Q99729 | Isoform 2 of Heterogeneous nuclear ribonucleoprotein A/B [OS=Homo sapiens]         | HNRNPAB  | 2 | 33 | 1 | 7  | 11.462 |                                                                                                                                                                                                       |
| P07910 | Heterogeneous nuclear ribonucleoproteins C1/C2 [OS=Homo sapiens]                   | HNRNPC   | 3 | 14 | 3 | 11 | 7.94   | RNA metabolism OR transcription;other metabolic processes;other biological processes                                                                                                                  |
| P14866 | Heterogeneous nuclear ribonucleoprotein L [OS=Homo sapiens]                        | HNRNPL   | 2 | 34 | 2 | 5  | 9.834  | RNA metabolism OR transcription;other metabolic processes;other biological processes                                                                                                                  |
| Q1KMD3 | heterogeneous nuclear ribonucleoprotein U-like protein 2 [OS=Homo sapiens]         | HNRNPUL2 | 5 | 61 | 5 | 7  | 25.467 |                                                                                                                                                                                                       |
| Q16666 | gamma-interferon-inducible protein 16 [OS=Homo sapiens]                            | IFI16    | 3 | 39 | 3 | 4  | 12.22  | cell organization and biogenesis;protein metabolism;other metabolic processes;stress response;developmental                                                                                           |

|        |                                                                                  |       |    |    |    |    |        |                                                                                                                             |
|--------|----------------------------------------------------------------------------------|-------|----|----|----|----|--------|-----------------------------------------------------------------------------------------------------------------------------|
|        |                                                                                  |       |    |    |    |    |        | processes;signal transduction;other biological processes                                                                    |
| Q70UQ0 | Inhibitor of nuclear factor kappa-B kinase-interacting protein [OS=Homo sapiens] | IKBIP | 3  | 39 | 3  | 8  | 13.348 | other biological processes                                                                                                  |
| Q96P70 | Importin-9 [OS=Homo sapiens]                                                     | IPO9  | 3  | 23 | 3  | 4  | 13.692 | transport                                                                                                                   |
| Q14573 | Inositol 1,4,5-trisphosphate receptor type 3 [OS=Homo sapiens]                   | ITPR3 | 3  | 28 | 3  | 1  | 9.312  | transport;signal transduction;other biological processes                                                                    |
| Q15046 | Lysine-tRNA ligase [OS=Homo sapiens]                                             | KARS1 | 5  | 48 | 5  | 8  | 19.229 | protein metabolism;RNA metabolism OR transcription;other metabolic processes;signal transduction;other biological processes |
| P09960 | leukotriene A-4 hydrolase [OS=Homo sapiens]                                      | LTA4H | 5  | 51 | 5  | 8  | 29.019 | protein metabolism;other metabolic processes                                                                                |
| P23368 | NAD-dependent malic enzyme, mitochondrial [OS=Homo sapiens]                      | ME2   | 2  | 26 | 2  | 4  | 9.83   | other metabolic processes;other biological processes                                                                        |
| Q14764 | major vault protein [OS=Homo sapiens]                                            | MVP   | 11 | 75 | 11 | 15 | 47.226 | transport;signal transduction;other biological processes                                                                    |
| O94832 | Unconventional myosin-IId [OS=Homo sapiens]                                      | MYO1D | 8  | 55 | 7  | 8  | 24.3   | cell organization and biogenesis;transport;developmental processes;other biological processes                               |
| Q9UM54 | Isoform 1 of Unconventional myosin-VI [OS=Homo sapiens]                          | MYO6  | 4  | 26 | 4  | 4  | 15.719 |                                                                                                                             |
| P40261 | Nicotinamide N-methyltransferase [OS=Homo sapiens]                               | NNMT  | 2  | 29 | 2  | 7  | 8.883  | other metabolic processes;developmental processes;other biological processes                                                |
| P46459 | Vesicle-fusing ATPase [OS=Homo sapiens]                                          | NSF   | 4  | 38 | 4  | 6  | 14.502 | cell organization and biogenesis;transport;other biological processes                                                       |
| Q8N1F7 | Nuclear pore complex protein Nup93 [OS=Homo sapiens]                             | NUP93 | 5  | 26 | 5  | 6  | 12.593 | cell organization and biogenesis;other metabolic processes;transport;signal transduction;other biological processes         |
| P22059 | Oxysterol-binding protein 1 [OS=Homo sapiens]                                    | OSBP  | 3  | 25 | 3  | 5  | 13.585 | cell organization and biogenesis;other metabolic                                                                            |

|        |                                                                             |        |   |     |   |    |        |                                                                                                                                                      |
|--------|-----------------------------------------------------------------------------|--------|---|-----|---|----|--------|------------------------------------------------------------------------------------------------------------------------------------------------------|
|        |                                                                             |        |   |     |   |    |        | processes;transport;other biological processes                                                                                                       |
| Q13177 | Serine/threonine-protein kinase PAK 2 [OS=Homo sapiens]                     | PAK2   | 3 | 28  | 3 | 7  | 10.556 | cell organization and biogenesis;protein metabolism;other metabolic processes;developmental processes;signal transduction;other biological processes |
| O00408 | cGMP-dependent 3',5'-cyclic phosphodiesterase [OS=Homo sapiens]             | PDE2A  | 4 | 50  | 4 | 5  | 18.11  | other metabolic processes;developmental processes;signal transduction;other biological processes                                                     |
| Q14554 | Protein disulfide-isomerase A5 [OS=Homo sapiens]                            | PDIA5  | 4 | 82  | 4 | 7  | 17.309 | other metabolic processes;other biological processes                                                                                                 |
| P17858 | ATP-dependent 6-phosphofructokinase, liver type [OS=Homo sapiens]           | PFKL   | 5 | 126 | 3 | 9  | 37.601 | other metabolic processes;other biological processes                                                                                                 |
| Q6PCE3 | glucose 1,6-bisphosphate synthase [OS=Homo sapiens]                         | PGM2L1 | 5 | 51  | 5 | 9  | 15.279 | other metabolic processes                                                                                                                            |
| Q92508 | Piezo-type mechanosensitive ion channel component 1 [OS=Homo sapiens]       | PIEZO1 | 7 | 33  | 7 | 4  | 26.49  | transport;other biological processes                                                                                                                 |
| O60568 | Procollagen-lysine,2-oxoglutarate 5-dioxygenase 3 [OS=Homo sapiens]         | PLOD3  | 4 | 40  | 4 | 5  | 18.912 | cell organization and biogenesis;protein metabolism;other metabolic processes;developmental processes;other biological processes                     |
| Q13131 | 5'-AMP-activated protein kinase catalytic subunit alpha-1 [OS=Homo sapiens] | PRKAA1 | 2 | 54  | 2 | 5  | 12.361 | cell-cell signaling;protein metabolism;other metabolic processes;stress response;transport;signal transduction;other biological processes            |
| O14818 | Proteasome subunit alpha type-7 [OS=Homo sapiens]                           | PSMA7  | 3 | 53  | 3 | 14 | 16.388 | protein metabolism;other metabolic processes                                                                                                         |
| P62191 | 26S proteasome regulatory subunit 4 [OS=Homo sapiens]                       | PSMC1  | 4 | 50  | 3 | 13 | 19.785 | protein metabolism;other metabolic processes;other biological processes                                                                              |
| P43686 | 26S proteasome regulatory subunit 6B [OS=Homo sapiens]                      | PSMC4  | 4 | 41  | 4 | 13 | 16.955 | protein metabolism;other metabolic processes;developmental processes;other biological processes                                                      |

|        |                                                                    |        |   |     |   |    |        |                                                                                                                                              |
|--------|--------------------------------------------------------------------|--------|---|-----|---|----|--------|----------------------------------------------------------------------------------------------------------------------------------------------|
| P62333 | 26S proteasome regulatory subunit 10B [OS=Homo sapiens]            | PSMC6  | 4 | 27  | 4 | 12 | 15.029 | protein metabolism;other metabolic processes;stress response;other biological processes                                                      |
| O00232 | 26S proteasome non-ATPase regulatory subunit 12 [OS=Homo sapiens]  | PSMD12 | 4 | 26  | 4 | 10 | 11.278 | protein metabolism;other metabolic processes                                                                                                 |
| O00487 | 26S proteasome non-ATPase regulatory subunit 14 [OS=Homo sapiens]  | PSMD14 | 3 | 20  | 3 | 9  | 7.666  | protein metabolism;DNA metabolism;other metabolic processes;stress response;other biological processes                                       |
| Q13200 | 26S proteasome non-ATPase regulatory subunit 2 [OS=Homo sapiens]   | PSMD2  | 8 | 113 | 8 | 8  | 36.21  | protein metabolism;other metabolic processes;other biological processes                                                                      |
| P26599 | Polypyrimidine tract-binding protein 1 [OS=Homo sapiens]           | PTBP1  | 4 | 58  | 4 | 9  | 17.976 | RNA metabolism OR transcription;other metabolic processes;other biological processes                                                         |
| P18031 | Tyrosine-protein phosphatase non-receptor type 1 [OS=Homo sapiens] | PTPN1  | 3 | 33  | 3 | 7  | 15.74  | cell organization and biogenesis;protein metabolism;other metabolic processes;stress response;signal transduction;other biological processes |
| O95716 | ras-related protein Rab-3D [OS=Homo sapiens]                       | RAB3D  | 4 | 34  | 3 | 16 | 16.261 | protein metabolism;other metabolic processes;transport;other biological processes                                                            |
| P15153 | Ras-related C3 botulinum toxin substrate 2 [OS=Homo sapiens]       | RAC2   | 5 | 181 | 2 | 27 | 27.539 | cell adhesion;cell organization and biogenesis;transport;developmental processes;signal transduction;other biological processes              |
| P0DJ00 | RANBP2-like and GRIP domain-containing protein 1 [OS=Homo sapiens] | RGPD1  | 2 | 21  | 2 | 1  | 7.395  | transport;other biological processes                                                                                                         |
| P62847 | 40S ribosomal protein S24 [OS=Homo sapiens]                        | RPS24  | 3 | 48  | 3 | 26 | 18.627 | protein metabolism;RNA metabolism OR transcription;other metabolic processes;developmental processes;other biological processes              |
| P62081 | 40S ribosomal protein S7 [OS=Homo sapiens]                         | RPS7   | 4 | 35  | 4 | 19 | 12.753 | protein metabolism;RNA metabolism OR transcription;other metabolic processes;developmental processes;other biological processes              |

|        |                                                                            |          |   |    |   |    |        |                                                                                                                                                                                |
|--------|----------------------------------------------------------------------------|----------|---|----|---|----|--------|--------------------------------------------------------------------------------------------------------------------------------------------------------------------------------|
| P10301 | Ras-related protein R-Ras<br>[OS=Homo sapiens]                             | RRAS     | 2 | 41 | 1 | 10 | 7.281  | developmental processes;signal transduction;other biological processes                                                                                                         |
| Q9P2E9 | Ribosome-binding protein 1<br>[OS=Homo sapiens]                            | RRBP1    | 3 | 22 | 3 | 3  | 13.588 |                                                                                                                                                                                |
| O95197 | Reticulon-3 [OS=Homo sapiens]                                              | RTN3     | 2 | 37 | 2 | 2  | 8.876  | cell organization and biogenesis;transport;other biological processes                                                                                                          |
| Q9Y230 | RuvB-like 2 [OS=Homo sapiens]                                              | RUVBL2   | 5 | 36 | 4 | 11 | 23.121 | cell organization and biogenesis;protein metabolism;DNA metabolism;other metabolic processes;stress response;other biological processes                                        |
| P49591 | Serine-tRNA ligase, cytoplasmic<br>[OS=Homo sapiens]                       | SARS1    | 6 | 45 | 6 | 10 | 19.271 | protein metabolism;RNA metabolism OR transcription;other metabolic processes;other biological processes                                                                        |
| Q9Y3A5 | Ribosome maturation protein SBDS [OS=Homo sapiens]                         | SBDS     | 2 | 44 | 2 | 7  | 7.425  | cell cycle OR cell proliferation;cell organization and biogenesis;RNA metabolism OR transcription;other metabolic processes;developmental processes;other biological processes |
| P67812 | Signal peptidase complex catalytic subunit SEC11A<br>[OS=Homo sapiens]     | SEC11A   | 2 | 54 | 2 | 9  | 8.084  | protein metabolism;other metabolic processes                                                                                                                                   |
| P53992 | Protein transport protein sec24c<br>[OS=Homo sapiens]                      | SEC24C   | 6 | 38 | 6 | 6  | 21.984 | cell organization and biogenesis;transport;developmental processes                                                                                                             |
| O94979 | Protein transport protein Sec31A<br>[OS=Homo sapiens]                      | SEC31A   | 6 | 21 | 6 | 5  | 18.636 | cell organization and biogenesis;transport;other biological processes                                                                                                          |
| Q6NUK1 | Calcium-binding mitochondrial carrier protein SCaMC-1<br>[OS=Homo sapiens] | SLC25A24 | 3 | 40 | 3 | 7  | 11.446 | stress response;transport;other biological processes                                                                                                                           |
| Q8NEW0 | Zinc transporter 7 [OS=Homo sapiens]                                       | SLC30A7  | 3 | 37 | 3 | 8  | 14.44  | transport;other biological processes                                                                                                                                           |
| Q15005 | Signal peptidase complex subunit 2 [OS=Homo sapiens]                       | SPCS2    | 2 | 19 | 2 | 7  | 7.274  | protein metabolism;other metabolic processes;transport                                                                                                                         |
| O15270 | Serine palmitoyltransferase 2<br>[OS=Homo sapiens]                         | SPTLC2   | 4 | 17 | 4 | 7  | 15.178 | other metabolic processes;developmental                                                                                                                                        |



|        |                                                                                                |        |   |    |   |    |        |                                                                                                                                                                                             |
|--------|------------------------------------------------------------------------------------------------|--------|---|----|---|----|--------|---------------------------------------------------------------------------------------------------------------------------------------------------------------------------------------------|
|        |                                                                                                |        |   |    |   |    |        | processes;other biological processes                                                                                                                                                        |
| P30626 | Sorcin [OS=Homo sapiens]                                                                       | SRI    | 2 | 41 | 2 | 11 | 9.89   | transport;developmental processes;signal transduction;other biological processes                                                                                                            |
| P19623 | spermidine synthase [OS=Homo sapiens]                                                          | SRM    | 6 | 53 | 6 | 23 | 19.942 | other metabolic processes;other biological processes                                                                                                                                        |
| Q13247 | Serine/arginine-rich splicing factor 6 [OS=Homo sapiens]                                       | SRSF6  | 2 | 32 | 2 | 5  | 7.952  | cell organization and biogenesis;RNA metabolism OR transcription;other metabolic processes;other biological processes                                                                       |
| Q86WV6 | Stimulator of interferon genes protein [OS=Homo sapiens]                                       | STING1 | 2 | 29 | 2 | 7  | 12.262 | cell organization and biogenesis;other metabolic processes;stress response;other biological processes                                                                                       |
| P31948 | stress-induced-phosphoprotein 1 [OS=Homo sapiens]                                              | STIP1  | 2 | 47 | 2 | 4  | 10.909 | other biological processes                                                                                                                                                                  |
| Q8TCJ2 | Dolichyl-diphosphooligosaccharide--protein glycosyltransferase subunit STT3B [OS=Homo sapiens] | STT3B  | 4 | 54 | 4 | 5  | 15.004 | protein metabolism;other metabolic processes;stress response                                                                                                                                |
| P53597 | Succinate--CoA ligase [ADP/GDP-forming] subunit alpha, mitochondrial [OS=Homo sapiens]         | SUCLG1 | 2 | 21 | 2 | 7  | 9.703  | other metabolic processes                                                                                                                                                                   |
| Q03518 | Antigen peptide transporter 1 [OS=Homo sapiens]                                                | TAP1   | 3 | 39 | 3 | 5  | 16.089 | stress response;transport;other biological processes                                                                                                                                        |
| Q03519 | antigen peptide transporter 2 [OS=Homo sapiens]                                                | TAP2   | 3 | 24 | 3 | 4  | 11.299 | transport;other biological processes                                                                                                                                                        |
| Q13488 | V-type proton ATPase 116 kDa subunit a isoform 3 [OS=Homo sapiens]                             | TCIRG1 | 3 | 34 | 3 | 4  | 15.268 | cell cycle OR cell proliferation;cell organization and biogenesis;protein metabolism;other metabolic processes;stress response;transport;developmental processes;other biological processes |
| P67936 | Tropomyosin alpha-4 chain [OS=Homo sapiens]                                                    | TPM4   | 4 | 27 | 4 | 15 | 19.12  | cell organization and biogenesis;other biological processes                                                                                                                                 |

|        |                                                                                     |        |   |     |   |    |        |                                                                                                                                                                                       |
|--------|-------------------------------------------------------------------------------------|--------|---|-----|---|----|--------|---------------------------------------------------------------------------------------------------------------------------------------------------------------------------------------|
| P10155 | 60 kDa SS-A/Ro ribonucleoprotein [OS=Homo sapiens]                                  | TROVE2 | 2 | 27  | 2 | 4  | 9.206  | cell organization and biogenesis;RNA metabolism OR transcription;other metabolic processes;developmental processes;signal transduction;other biological processes                     |
| Q9Y5S1 | Transient receptor potential cation channel subfamily V member 2 [OS=Homo sapiens]  | TRPV2  | 7 | 50  | 7 | 11 | 29.879 | cell organization and biogenesis;stress response;transport;developmental processes;other biological processes                                                                         |
| Q3KQV9 | UDP-N-acetylhexosamine pyrophosphorylase-like protein 1 [OS=Homo sapiens]           | UAP1L1 | 2 | 38  | 2 | 5  | 7.659  | other metabolic processes                                                                                                                                                             |
| Q9H3U1 | Isoform 2 of Protein unc-45 homolog A [OS=Homo sapiens]                             | UNC45A | 3 | 49  | 3 | 3  | 13.425 |                                                                                                                                                                                       |
| O60763 | General vesicular transport factor p115 [OS=Homo sapiens]                           | USO1   | 9 | 100 | 9 | 11 | 38.484 | cell organization and biogenesis;transport;signal transduction;other biological processes                                                                                             |
| Q93008 | Isoform 2 of Probable ubiquitin carboxyl-terminal hydrolase FAF-X [OS=Homo sapiens] | USP9X  | 7 | 56  | 7 | 3  | 23.73  | cell cycle OR cell proliferation;cell organization and biogenesis;protein metabolism;other metabolic processes;developmental processes;signal transduction;other biological processes |
| Q709C8 | Vacuolar protein sorting-associated protein 13C [OS=Homo sapiens]                   | VPS13C | 7 | 43  | 7 | 3  | 25.686 | cell organization and biogenesis;transport;other biological processes                                                                                                                 |
| O75436 | Vacuolar protein sorting-associated protein 26A [OS=Homo sapiens]                   | VPS26A | 2 | 30  | 2 | 9  | 7.773  | transport;other biological processes                                                                                                                                                  |
| P07947 | tyrosine-protein kinase Yes [OS=Homo sapiens]                                       | YES1   | 3 | 72  | 1 | 5  | 14.658 | protein metabolism;other metabolic processes;stress response;transport;signal transduction;other biological processes                                                                 |
| P31946 | 14-3-3 protein beta/alpha [OS=Homo sapiens]                                         | YWHAB  | 8 | 364 | 5 | 30 | 46.815 | transport;other biological processes                                                                                                                                                  |
| P27348 | 14-3-3 protein theta [OS=Homo sapiens]                                              | YWHAQ  | 4 | 319 | 2 | 21 | 27.469 | transport;signal transduction;other biological processes                                                                                                                              |



**Table S4. Proteins belonging to the enriched biological process “neutrophil-mediated immunity” as determined by over-representation analysis using WebGestalt.**

| Gene symbol | Accession | Gene Name                                         | Entrez Gene ID |
|-------------|-----------|---------------------------------------------------|----------------|
| ACAA1       | P09110    | acetyl-CoA acyltransferase 1                      | 30             |
| ACLY        | P53396    | ATP citrate lyase                                 | 47             |
| AP2A2       | O94973    | adaptor related protein complex 2 subunit alpha 2 | 161            |
| APRT        | P07741    | adenine phosphoribosyltransferase                 | 353            |
| ARL8A       | Q96BM9    | ADP ribosylation factor like GTPase 8A            | 127829         |
| ATAD3B      | Q5T9A4    | ATPase family, AAA domain containing 3B           | 83858          |
| CAND1       | Q86VP6    | cullin associated and neddylation dissociated 1   | 55832          |
| CAPN1       | P07384    | calpain 1                                         | 823            |
| CAT         | P04040    | catalase                                          | 847            |
| CCT2        | P78371    | chaperonin containing TCP1 subunit 2              | 10576          |
| CCT8        | P50990    | chaperonin containing TCP1 subunit 8              | 10694          |
| COPB1       | P53618    | coatamer protein complex subunit beta 1           | 1315           |
| CYFIP1      | Q7L576    | cytoplasmic FMR1 interacting protein 1            | 23191          |
| DNAJC3      | Q13217    | DnaJ heat shock protein family (Hsp40) member C3  | 5611           |
| DYNLL1      | P63167    | dynein light chain LC8-type 1                     | 8655           |
| ERP44       | Q9BS26    | endoplasmic reticulum protein 44                  | 23071          |
| GDI2        | P50395    | GDP dissociation inhibitor 2                      | 2665           |
| JUP         | P14923    | junction plakoglobin                              | 3728           |
| KPNB1       | Q14974    | karyopherin subunit beta 1                        | 3837           |
| LTA4H       | P09960    | leukotriene A4 hydrolase                          | 4048           |
| MAGT1       | Q9H0U3    | magnesium transporter 1                           | 84061          |
| MVP         | Q14764    | major vault protein                               | 9961           |
| PFKL        | P17858    | phosphofructokinase, liver type                   | 5211           |
| PGM2        | Q96G03    | phosphoglucomutase 2                              | 55276          |
| PSMC2       | P35998    | proteasome 26S subunit, ATPase 2                  | 5701           |
| PSMC3       | P17980    | proteasome 26S subunit, ATPase 3                  | 5702           |
| PSMD1       | Q99460    | proteasome 26S subunit, non-ATPase 1              | 5707           |
| PSMD12      | O00232    | proteasome 26S subunit, non-ATPase 12             | 5718           |
| PSMD13      | Q9UNM6    | proteasome 26S subunit, non-ATPase 13             | 5719           |
| PSMD14      | O00487    | proteasome 26S subunit, non-ATPase 14             | 10213          |
| PSMD2       | Q13200    | proteasome 26S subunit, non-ATPase 2              | 5708           |
| PSMD3       | O43242    | proteasome 26S subunit, non-ATPase 3              | 5709           |
| PYGB        | P11216    | glycogen phosphorylase B                          | 5834           |
| RAB3D       | O95716    | RAB3D, member RAS oncogene family                 | 9545           |
| SERPINB6    | P35237    | serpin family B member 6                          | 5269           |
| SPTAN1      | Q13813    | spectrin alpha, non-erythrocytic 1                | 6709           |
| SURF4       | O15260    | surfeit 4                                         | 6836           |

---

|         |        |                                                                             |        |
|---------|--------|-----------------------------------------------------------------------------|--------|
| TCIRG1  | Q13488 | T cell immune regulator 1, ATPase H <sup>+</sup> transporting V0 subunit a3 | 10312  |
| TMEM173 | Q86WV6 | transmembrane protein 173                                                   | 340061 |
| VCL     | P18206 | vinculin                                                                    | 7414   |
| XRCC6   | P12956 | X-ray repair cross complementing 6                                          | 2547   |

**Table S5.** Proteins belonging to the enriched biological process “cell redox homeostasis” as determined by over-representation analysis using WebGestalt.

| Gene symbol | Accession | Gene Name                                         | Entrez Gene ID |
|-------------|-----------|---------------------------------------------------|----------------|
| DNAJC10     | Q8IXB1    | DnaJ heat shock protein family (Hsp40) member C10 | 54431          |
| ERP44       | Q9BS26    | endoplasmic reticulum protein 44                  | 23071          |
| GPX1        | P07203    | glutathione peroxidase 1                          | 2876           |
| NNT         | Q13423    | nicotinamide nucleotide transhydrogenase          | 23530          |
| P4HB        | P07237    | prolyl 4-hydroxylase subunit beta                 | 5034           |
| PDIA4       | P13667    | protein disulfide isomerase family A member 4     | 9601           |
| PDIA5       | Q14554    | protein disulfide isomerase family A member 5     | 10954          |
| PRDX2       | P32119    | peroxiredoxin 2                                   | 7001           |
| PRDX5       | P30044    | peroxiredoxin 5                                   | 25824          |

**Table S6. Proteins belonging to the enriched KEGG pathway “adherens junction” as determined by over-representation analysis using WebGestalt.**

| Gene symbol | Accession | Gene Name                                         | Entrez Gene ID |
|-------------|-----------|---------------------------------------------------|----------------|
| ACTN1       | P12814    | actinin alpha 1                                   | 87             |
| ACTN4       | O43707    | actinin alpha 4                                   | 81             |
| CDC42       | P60953    | cell division cycle 42                            | 998            |
| CSNK2A2     | P19784    | casein kinase 2 alpha 2                           | 1459           |
| CTNNA1      | P35221    | catenin alpha 1                                   | 1495           |
| CTNNB1      | P35222    | catenin beta 1                                    | 1499           |
| CTNND1      | O60716    | catenin delta 1                                   | 1500           |
| PTPN1       | P18031    | protein tyrosine phosphatase, non-receptor type 1 | 5770           |
| RAC2        | P15153    | Rac family small GTPase 2                         | 5880           |
| VCL         | P18206    | vinculin                                          | 7414           |
| YES1        | P07947    | YES proto-oncogene 1, Src family tyrosine kinase  | 7525           |

Table S7: List of 327 proteins modified by 2-CIHdY in HLMVEC including those also modified by HDyA

| Accession | Description                                                                      | Gene Symbol | # Peptides | # PSMs | # Unique Peptides | Coverage [%] | Sum PEP Score | Biological Process                                                                                                      |
|-----------|----------------------------------------------------------------------------------|-------------|------------|--------|-------------------|--------------|---------------|-------------------------------------------------------------------------------------------------------------------------|
| P09110-1  | 3-ketoacyl-CoA thiolase, peroxisomal [OS=Homo sapiens]                           | ACAA1       | 3          | 22     | 3                 | 13           | 22.974        | other metabolic processes                                                                                               |
| P49748-1  | Very long-chain specific acyl-CoA dehydrogenase, mitochondrial [OS=Homo sapiens] | ACADVL      | 5          | 92     | 5                 | 8            | 20.94         | other metabolic processes;stress response;other biological processes                                                    |
| P53396-1  | ATP-citrate synthase [OS=Homo sapiens]                                           | ACLY        | 20         | 631    | 20                | 21           | 135.424       | other metabolic processes                                                                                               |
| Q99798    | Aconitate hydratase, mitochondrial [OS=Homo sapiens]                             | ACO2        | 7          | 69     | 7                 | 11           | 33.222        | other metabolic processes;stress response;developmental processes                                                       |
| O00154-4  | Isoform 4 of Cytosolic acyl coenzyme A thioester hydrolase [OS=Homo sapiens]     | ACOT7       | 6          | 75     | 6                 | 23           | 28.271        |                                                                                                                         |
| Q9Y305-1  | Acyl-coenzyme A thioesterase 9, mitochondrial [OS=Homo sapiens]                  | ACOT9       | 5          | 124    | 5                 | 12           | 27.019        | other metabolic processes                                                                                               |
| O95573    | long-chain-fatty-acid--CoA ligase 3 [OS=Homo sapiens]                            | ACSL3       | 6          | 27     | 6                 | 9            | 21.406        | cell organization and biogenesis;other metabolic processes;transport;developmental processes;other biological processes |
| P12814-1  | Alpha-actinin-1 [OS=Homo sapiens]                                                | ACTN1       | 33         | 1554   | 21                | 42           | 254.602       | cell adhesion;cell organization and biogenesis;developmental processes;other biological processes                       |
| O43707    | Alpha-actinin-4 [OS=Homo sapiens]                                                | ACTN4       | 28         | 1102   | 16                | 39           | 205.348       | transport;signal transduction;other biological processes                                                                |
| P35611-1  | Alpha-adducin [OS=Homo sapiens]                                                  | ADD1        | 5          | 52     | 5                 | 10           | 18.85         | cell organization and biogenesis;other biological processes                                                             |
| P11766    | alcohol dehydrogenase class-3 [OS=Homo sapiens]                                  | ADH5        | 2          | 19     | 2                 | 7            | 5.625         | protein metabolism;other metabolic processes;stress response;other biological processes                                 |
| P30566    | adenylosuccinate lyase [OS=Homo sapiens]                                         | ADSL        | 2          | 48     | 2                 | 4            | 11.027        | other metabolic processes;stress response;other biological processes                                                    |



|          |                                                                                            |                                                   |   |     |   |    |        |                                                                                                                                  |
|----------|--------------------------------------------------------------------------------------------|---------------------------------------------------|---|-----|---|----|--------|----------------------------------------------------------------------------------------------------------------------------------|
| P23526-1 | Adenosylhomocysteinase<br>[OS=Homo sapiens]                                                | AHCY                                              | 8 | 65  | 8 | 21 | 32.366 | other metabolic processes;stress response;other biological processes                                                             |
| Q09666-1 | Neuroblast differentiation-associated protein AHNAK<br>[OS=Homo sapiens]                   | AHNAK                                             | 6 | 94  | 6 | 3  | 27.183 | other biological processes                                                                                                       |
| Q13155   | aminoacyl tRNA synthase complex-interacting multifunctional protein 2<br>[OS=Homo sapiens] | AIMP2                                             | 2 | 60  | 2 | 7  | 12.606 | cell organization and biogenesis;protein metabolism;other metabolic processes;developmental processes;other biological processes |
| P00568   | Adenylate kinase isoenzyme 1<br>[OS=Homo sapiens]                                          | AK1                                               | 2 | 27  | 2 | 12 | 10.902 | other metabolic processes                                                                                                        |
| P54886   | delta-1-pyrroline-5-carboxylate synthase [OS=Homo sapiens]                                 | ALDH18A1                                          | 6 | 92  | 6 | 8  | 31.567 | other metabolic processes                                                                                                        |
| P05091   | Aldehyde dehydrogenase, mitochondrial [OS=Homo sapiens]                                    | ALDH2                                             | 8 | 238 | 6 | 17 | 40.781 | other metabolic processes                                                                                                        |
| P09525   | annexin A4 [OS=Homo sapiens]                                                               | ANXA4                                             | 4 | 28  | 3 | 13 | 15.159 | signal transduction;other biological processes                                                                                   |
| P20073-1 | Annexin A7 [OS=Homo sapiens]                                                               | ANXA7                                             | 2 | 22  | 2 | 4  | 6.166  | cell organization and biogenesis;other metabolic processes;other biological processes                                            |
| O43747-1 | AP-1 complex subunit gamma-1<br>[OS=Homo sapiens]                                          | AP1G1                                             | 3 | 22  | 3 | 3  | 8.547  | cell organization and biogenesis;transport;other biological processes                                                            |
| O95782   | AP-2 complex subunit alpha-1<br>[OS=Homo sapiens]                                          | AP2A1                                             | 7 | 117 | 4 | 7  | 30.12  | transport;other biological processes                                                                                             |
| O94973   | AP-2 complex subunit alpha-2<br>[OS=Homo sapiens]                                          | AP2A2                                             | 6 | 64  | 3 | 6  | 26.076 | transport                                                                                                                        |
| P63010-1 | AP-2 complex subunit beta<br>[OS=Homo sapiens]                                             | Ap2b1;<br>AP2B1;<br>LOC101351101;<br>LOC111151383 | 9 | 149 | 5 | 9  | 33.512 | cell organization and biogenesis;other metabolic processes;transport;developmental processes;other biological processes          |
| Q96CW1   | AP-2 complex subunit mu<br>[OS=Homo sapiens]                                               | AP2M1                                             | 6 | 62  | 6 | 13 | 25.612 | cell organization and biogenesis;other metabolic processes;transport;other biological processes                                  |
| O00203-1 | AP-3 complex subunit beta-1<br>[OS=Homo sapiens]                                           | AP3B1                                             | 3 | 23  | 3 | 3  | 15.351 | cell organization and biogenesis;protein metabolism;RNA                                                                          |

|          |                                                                  |          |   |     |   |    |        |                                                                                                                                                        |
|----------|------------------------------------------------------------------|----------|---|-----|---|----|--------|--------------------------------------------------------------------------------------------------------------------------------------------------------|
|          |                                                                  |          |   |     |   |    |        | metabolism OR transcription;other metabolic processes;stress response;transport;developmental processes;signal transduction;other biological processes |
| Q14617-1 | AP-3 complex subunit delta-1 [OS=Homo sapiens]                   | AP3D1    | 2 | 41  | 2 | 2  | 7.67   | cell organization and biogenesis;transport;other biological processes                                                                                  |
| Q9HDC9   | Adipocyte plasma membrane-associated protein [OS=Homo sapiens]   | APMAP    | 2 | 42  | 2 | 6  | 10.787 | other metabolic processes                                                                                                                              |
| P07741-1 | Adenine phosphoribosyltransferase [OS=Homo sapiens]              | APRT     | 4 | 85  | 4 | 24 | 21.026 | other metabolic processes;transport;developmental processes;other biological processes                                                                 |
| P48444   | Coatomer subunit delta [OS=Homo sapiens]                         | ARCN1    | 7 | 103 | 7 | 13 | 35.53  | transport;developmental processes;other biological processes                                                                                           |
| P61204   | ADP-ribosylation factor 3 [OS=Homo sapiens]                      | ARF3     | 5 | 185 | 3 | 30 | 40.7   | transport                                                                                                                                              |
| Q07960   | rho GTPase-activating protein 1 [OS=Homo sapiens]                | ARHGA P1 | 3 | 42  | 3 | 6  | 9.008  | transport;signal transduction;other biological processes                                                                                               |
| P40616   | ADP-ribosylation factor-like protein 1 [OS=Homo sapiens]         | ARL1     | 3 | 37  | 3 | 19 | 13.498 | cell organization and biogenesis;other metabolic processes;transport;other biological processes                                                        |
| Q96BM9   | ADP-ribosylation factor-like protein 8A [OS=Homo sapiens]        | ARL8A    | 4 | 64  | 1 | 20 | 18.099 | cell cycle OR cell proliferation;transport;other biological processes                                                                                  |
| Q92747   | Actin-related protein 2/3 complex subunit 1A [OS=Homo sapiens]   | ARPC1 A  | 2 | 55  | 1 | 4  | 6.947  | cell organization and biogenesis                                                                                                                       |
| O15143   | Actin-related protein 2/3 complex subunit 1B [OS=Homo sapiens]   | ARPC1 B  | 6 | 162 | 5 | 17 | 28.939 | cell organization and biogenesis;other biological processes                                                                                            |
| O15145   | Actin-related protein 2/3 complex subunit 3 [OS=Homo sapiens]    | ARPC3    | 3 | 53  | 3 | 16 | 17.182 | cell organization and biogenesis;other biological processes                                                                                            |
| Q5T9A4   | ATPase family AAA domain-containing protein 3B [OS=Homo sapiens] | ATAD3 B  | 3 | 57  | 3 | 4  | 16.992 | cell organization and biogenesis                                                                                                                       |

|          |                                                                       |                                  |    |     |    |    |        |                                                                                                                                                         |
|----------|-----------------------------------------------------------------------|----------------------------------|----|-----|----|----|--------|---------------------------------------------------------------------------------------------------------------------------------------------------------|
| Q6DD88   | Atlastin-3 [OS=Homo sapiens]                                          | ATL3                             | 3  | 50  | 3  | 9  | 24.845 | cell organization and biogenesis;other biological processes                                                                                             |
| Q9HD20   | manganese-transporting ATPase 13A1 [OS=Homo sapiens]                  | ATP13A1                          | 3  | 29  | 3  | 3  | 12.426 | transport;other biological processes                                                                                                                    |
| P16615   | Sarcoplasmic/endoplasmic reticulum calcium ATPase 2 [OS=Homo sapiens] | ATP2A2                           | 12 | 167 | 12 | 15 | 75.944 | cell adhesion;cell organization and biogenesis;other metabolic processes;stress response;transport;signal transduction;other biological processes       |
| P23634-1 | Plasma membrane calcium-transporting ATPase 4 [OS=Homo sapiens]       | ATP2B4                           | 7  | 48  | 7  | 7  | 29.056 | stress response;transport;developmental processes;other biological processes                                                                            |
| P36542-1 | ATP synthase subunit gamma, mitochondrial [OS=Homo sapiens]           | ATP5F1C                          | 4  | 29  | 4  | 13 | 16.924 | other metabolic processes;transport                                                                                                                     |
| P48047   | ATP synthase subunit O, mitochondrial [OS=Homo sapiens]               | ATP5PO                           | 4  | 65  | 4  | 21 | 17.526 | other metabolic processes;transport                                                                                                                     |
| P61421   | V-type proton ATPase subunit d 1 [OS=Homo sapiens]                    | ATP6V0D1                         | 2  | 47  | 2  | 5  | 9.875  | cell organization and biogenesis;transport;developmental processes;other biological processes                                                           |
| P21281   | V-type proton ATPase subunit B, brain isoform [OS=Homo sapiens]       | ATP6V1B2                         | 4  | 77  | 4  | 10 | 21.052 | other metabolic processes;transport;other biological processes                                                                                          |
| Q13838-1 | spliceosome RNA helicase DDX39B [OS=Homo sapiens]                     | BAT1;<br>DDX39B;<br>LOC101341139 | 8  | 192 | 1  | 17 | 41.394 | cell organization and biogenesis;RNA metabolism OR transcription;other metabolic processes;transport;developmental processes;other biological processes |
| P51572   | B-cell receptor-associated protein 31 [OS=Homo sapiens]               | BCAP31                           | 4  | 35  | 4  | 14 | 15.543 | cell organization and biogenesis;stress response;transport;signal transduction;other biological processes                                               |
| P53004   | Biliverdin reductase A [OS=Homo sapiens]                              | BLVRA                            | 4  | 42  | 4  | 16 | 19.327 | other metabolic processes                                                                                                                               |

|          |                                                                    |                        |    |     |    |    |        |                                                                                                                                                                                 |
|----------|--------------------------------------------------------------------|------------------------|----|-----|----|----|--------|---------------------------------------------------------------------------------------------------------------------------------------------------------------------------------|
| Q43684   | Mitotic checkpoint protein BUB3<br>[OS=Homo sapiens]               | BUB3                   | 3  | 41  | 3  | 11 | 13.755 | cell cycle OR cell proliferation;cell organization and biogenesis;signal transduction;other biological processes                                                                |
| P27708   | CAD protein [OS=Homo sapiens]                                      | CAD                    | 9  | 85  | 9  | 5  | 32.583 | protein metabolism;other metabolic processes;stress response;transport;developmental processes;other biological processes                                                       |
| Q86VP6-1 | cullin-associated nedd8-dissociated protein 1<br>[OS=Homo sapiens] | CAND1;<br>LOC111142147 | 17 | 198 | 17 | 15 | 79.588 | cell organization and biogenesis;protein metabolism;other metabolic processes;other biological processes                                                                        |
| P27824   | Calnexin [OS=Homo sapiens]                                         | CANX                   | 3  | 26  | 3  | 6  | 13.919 | stress response;transport;signal transduction;other biological processes                                                                                                        |
| P40121   | Macrophage-capping protein<br>[OS=Homo sapiens]                    | CAPG                   | 2  | 24  | 2  | 6  | 10.047 | cell organization and biogenesis;developmental processes;other biological processes                                                                                             |
| P07384   | Calpain-1 catalytic subunit<br>[OS=Homo sapiens]                   | CAPN1                  | 11 | 229 | 11 | 14 | 49.108 | protein metabolism;other metabolic processes;developmental processes;other biological processes                                                                                 |
| P04040   | catalase [OS=Homo sapiens]                                         | CAT                    | 4  | 34  | 4  | 9  | 23.855 | protein metabolism;other metabolic processes;stress response;developmental processes;other biological processes                                                                 |
| Q03135   | Caveolin-1 [OS=Homo sapiens]                                       | CAV1                   | 5  | 623 | 5  | 23 | 41.252 | cell-cell signaling;cell organization and biogenesis;other metabolic processes;stress response;transport;developmental processes;signal transduction;other biological processes |
| Q6NZI2-1 | caveolae-associated protein 1<br>[OS=Homo sapiens]                 | CAVIN1                 | 4  | 19  | 4  | 11 | 16.343 | RNA metabolism OR transcription;other metabolic processes;transport;other biological processes                                                                                  |
| P16152   | Carbonyl reductase [NADPH] 1<br>[OS=Homo sapiens]                  | CBR1                   | 6  | 51  | 6  | 30 | 28.538 | other metabolic processes;other biological processes                                                                                                                            |

|          |                                                            |                  |    |     |    |    |        |                                                                                                                                                                                                                 |
|----------|------------------------------------------------------------|------------------|----|-----|----|----|--------|-----------------------------------------------------------------------------------------------------------------------------------------------------------------------------------------------------------------|
| P78371-1 | T-complex protein 1 subunit beta [OS=Homo sapiens]         | CCT2; HEL-S-100n | 10 | 111 | 10 | 20 | 51.862 | cell organization and biogenesis;transport;other biological processes                                                                                                                                           |
| P49368-1 | T-complex protein 1 subunit gamma [OS=Homo sapiens]        | CCT3             | 15 | 178 | 15 | 28 | 71.947 | cell organization and biogenesis;transport;other biological processes                                                                                                                                           |
| P50991   | T-complex protein 1 subunit delta [OS=Homo sapiens]        | CCT4             | 11 | 219 | 10 | 23 | 54.922 | transport;other biological processes                                                                                                                                                                            |
| P48643   | T-complex protein 1 subunit epsilon [OS=Homo sapiens]      | CCT5             | 7  | 109 | 7  | 11 | 24.647 | transport;other biological processes                                                                                                                                                                            |
| P40227-1 | T-complex protein 1 subunit zeta [OS=Homo sapiens]         | CCT6A            | 14 | 219 | 11 | 25 | 65.266 | other biological processes                                                                                                                                                                                      |
| P50990   | T-complex protein 1 subunit theta [OS=Homo sapiens]        | CCT8             | 13 | 191 | 13 | 28 | 59.893 | cell organization and biogenesis;transport;other biological processes                                                                                                                                           |
| P60953   | Cell division control protein 42 homolog [OS=Homo sapiens] | CDC42            | 2  | 105 | 1  | 11 | 15.258 | cell-cell signaling;cell organization and biogenesis;protein metabolism;other metabolic processes;stress response;transport;developmental processes;signal transduction;other biological processes              |
| O00299   | chloride intracellular channel protein 1 [OS=Homo sapiens] | CLIC1            | 6  | 115 | 5  | 29 | 33.4   | other metabolic processes;transport;signal transduction;other biological processes                                                                                                                              |
| Q9Y696   | Chloride intracellular channel protein 4 [OS=Homo sapiens] | CLIC4            | 6  | 87  | 5  | 19 | 20.354 | transport;developmental processes;other biological processes                                                                                                                                                    |
| P10909-1 | Clusterin [OS=Homo sapiens]                                | CLU              | 5  | 76  | 5  | 15 | 29.634 | cell cycle OR cell proliferation;cell organization and biogenesis;protein metabolism;other metabolic processes;stress response;transport;developmental processes;signal transduction;other biological processes |
| P21964-1 | Catechol O-methyltransferase [OS=Homo sapiens]             | COMT             | 2  | 13  | 2  | 7  | 7.85   | other metabolic processes;stress response;other biological processes                                                                                                                                            |
| P53621-1 | coatamer subunit alpha [OS=Homo sapiens]                   | COPA             | 22 | 498 | 22 | 20 | 119.74 | transport;signal transduction                                                                                                                                                                                   |
| P53618   | Coatamer subunit beta [OS=Homo sapiens]                    | COPB1            | 12 | 129 | 12 | 15 | 46.234 | transport                                                                                                                                                                                                       |

|          |                                                                            |             |   |     |   |    |        |                                                                                                                                                                                                                                                     |
|----------|----------------------------------------------------------------------------|-------------|---|-----|---|----|--------|-----------------------------------------------------------------------------------------------------------------------------------------------------------------------------------------------------------------------------------------------------|
| P35606   | Coatomer subunit beta'<br>[OS=Homo sapiens]                                | COPB2       | 9 | 196 | 9 | 9  | 36.43  | transport                                                                                                                                                                                                                                           |
| Q9Y678   | Coatomer subunit gamma-1<br>[OS=Homo sapiens]                              | COPG1       | 9 | 98  | 9 | 16 | 42.333 | transport;other biological processes                                                                                                                                                                                                                |
| P50416   | Carnitine O-<br>palmitoyltransferase 1, liver<br>isoform [OS=Homo sapiens] | CPT1A       | 4 | 48  | 4 | 6  | 14.406 | other metabolic<br>processes;transport;developmental<br>processes;other biological<br>processes                                                                                                                                                     |
| P19784   | casein kinase II subunit alpha'<br>[OS=Homo sapiens]                       | CSNK2<br>A2 | 2 | 34  | 1 | 4  | 7.308  | cell-cell signaling;cell cycle OR cell<br>proliferation;protein<br>metabolism;other metabolic<br>processes;developmental<br>processes;signal transduction;other<br>biological processes                                                             |
| P56545   | c-terminal-binding protein 2<br>[OS=Homo sapiens]                          | CTBP2       | 2 | 16  | 2 | 4  | 6.604  | cell-cell signaling;cell organization<br>and biogenesis;transport;other<br>biological processes                                                                                                                                                     |
| P35221   | Catenin alpha-1 [OS=Homo<br>sapiens]                                       | CTNNA<br>1  | 3 | 33  | 3 | 5  | 11.952 | cell adhesion;cell organization and<br>biogenesis;stress<br>response;developmental<br>processes;other biological<br>processes                                                                                                                       |
| P35222   | Catenin beta-1 [OS=Homo<br>sapiens]                                        | CTNNB<br>1  | 5 | 52  | 3 | 7  | 21.891 | cell adhesion;cell-cell signaling;cell<br>cycle OR cell proliferation;cell<br>organization and biogenesis;protein<br>metabolism;other metabolic<br>processes;transport;developmental<br>processes;signal transduction;other<br>biological processes |
| O60716-1 | Catenin delta-1 [OS=Homo<br>sapiens]                                       | CTNND<br>1  | 6 | 71  | 6 | 7  | 24.429 | cell adhesion;cell-cell signaling;cell<br>organization and<br>biogenesis;developmental<br>processes;signal transduction;other<br>biological processes                                                                                               |
| Q9UHQ9   | NADH-cytochrome b5<br>reductase 1 [OS=Homo<br>sapiens]                     | CYB5R<br>1  | 3 | 71  | 3 | 9  | 11.109 | other metabolic processes;transport                                                                                                                                                                                                                 |
| Q7L576-1 | cytoplasmic FMR1-interacting<br>protein 1 [OS=Homo sapiens]                | CYFIP1      | 9 | 221 | 9 | 7  | 46.861 | cell organization and<br>biogenesis;developmental<br>processes;signal transduction;other<br>biological processes                                                                                                                                    |

|          |                                                                             |         |    |     |    |    |        |                                                                                                                                                                              |
|----------|-----------------------------------------------------------------------------|---------|----|-----|----|----|--------|------------------------------------------------------------------------------------------------------------------------------------------------------------------------------|
| Q14203   | Dynactin subunit 1 [OS=Homo sapiens]                                        | DCTN1   | 3  | 57  | 3  | 2  | 13.904 | cell cycle OR cell proliferation;cell organization and biogenesis;transport;developmental processes;other biological processes                                               |
| Q92499   | ATP-dependent RNA helicase DDX1 [OS=Homo sapiens]                           | DDX1    | 6  | 54  | 6  | 9  | 28.532 | cell organization and biogenesis;DNA metabolism;RNA metabolism OR transcription;other metabolic processes;stress response;developmental processes;other biological processes |
| Q92841-1 | Isoform 2 of Probable ATP-dependent RNA helicase DDX17 [OS=Homo sapiens]    | DDX17   | 16 | 312 | 10 | 25 | 80.604 |                                                                                                                                                                              |
| P17844   | probable ATP-dependent RNA helicase DDX5 [OS=Homo sapiens]                  | DDX5    | 12 | 315 | 6  | 18 | 71.19  | RNA metabolism OR transcription;other metabolic processes;developmental processes;signal transduction;other biological processes                                             |
| Q9UBM7   | 7-dehydrocholesterol reductase [OS=Homo sapiens]                            | DHCR7   | 3  | 79  | 3  | 6  | 14.359 | other metabolic processes;other biological processes                                                                                                                         |
| O43143   | Pre-mRNA-splicing factor ATP-dependent RNA helicase DHX15 [OS=Homo sapiens] | DHX15   | 4  | 63  | 4  | 5  | 14.244 | RNA metabolism OR transcription;other metabolic processes;other biological processes                                                                                         |
| Q9UDY4   | DnaJ homolog subfamily B member 4 [OS=Homo sapiens]                         | DNAJB4  | 9  | 124 | 9  | 34 | 39.654 | stress response;other biological processes                                                                                                                                   |
| Q8IXB1-1 | DnaJ homolog subfamily C member 10 [OS=Homo sapiens]                        | DNAJC10 | 4  | 68  | 3  | 4  | 15.54  | protein metabolism;other metabolic processes;stress response;signal transduction;other biological processes                                                                  |
| Q13217   | DnaJ homolog subfamily C member 3 [OS=Homo sapiens]                         | DNAJC3  | 4  | 60  | 4  | 9  | 19.322 | protein metabolism;other metabolic processes;stress response;other biological processes                                                                                      |
| P50570-1 | Dynammin-2 [OS=Homo sapiens]                                                | DNM2    | 6  | 104 | 6  | 7  | 26.752 | cell cycle OR cell proliferation;cell organization and biogenesis;other metabolic processes;transport;developmental processes;signal transduction;other biological processes |

|          |                                                                            |        |    |     |    |    |        |                                                                                                                                              |
|----------|----------------------------------------------------------------------------|--------|----|-----|----|----|--------|----------------------------------------------------------------------------------------------------------------------------------------------|
| Q9BZ29-1 | Dedicator of cytokinesis protein 9 [OS=Homo sapiens]                       | DOCK9  | 7  | 60  | 7  | 4  | 28.607 | signal transduction;other biological processes                                                                                               |
| Q16555-1 | Dihydropyrimidinase-related protein 2 [OS=Homo sapiens]                    | DPYSL2 | 10 | 296 | 9  | 22 | 54.802 | cell organization and biogenesis;other metabolic processes;transport;developmental processes;signal transduction;other biological processes  |
| Q14195-2 | Isoform LCRMP-4 of Dihydropyrimidinase-related protein 3 [OS=Homo sapiens] | DPYSL3 | 6  | 152 | 5  | 10 | 27.19  |                                                                                                                                              |
| P63167   | Dynein light chain 1, cytoplasmic [OS=Homo sapiens]                        | DYNLL1 | 2  | 18  | 2  | 33 | 6.839  | cell organization and biogenesis;other biological processes                                                                                  |
| Q15029   | 116 kDa U5 small nuclear ribonucleoprotein component [OS=Homo sapiens]     | EFTUD2 | 3  | 180 | 2  | 3  | 16.668 | RNA metabolism OR transcription;other metabolic processes;other biological processes                                                         |
| Q9H4M9   | EH domain-containing protein 1 [OS=Homo sapiens]                           | EHD1   | 5  | 130 | 3  | 9  | 22.893 | cell organization and biogenesis;transport;developmental processes;other biological processes                                                |
| Q9NZN4   | EH domain-containing protein 2 [OS=Homo sapiens]                           | EHD2   | 10 | 187 | 8  | 16 | 33.539 | cell organization and biogenesis;transport;other biological processes                                                                        |
| Q9H223   | EH domain-containing protein 4 [OS=Homo sapiens]                           | EHD4   | 13 | 285 | 11 | 25 | 72.884 | cell organization and biogenesis;transport;other biological processes                                                                        |
| P05198   | Eukaryotic translation initiation factor 2 subunit 1 [OS=Homo sapiens]     | EIF2S1 | 4  | 74  | 4  | 13 | 18.144 | cell organization and biogenesis;protein metabolism;other metabolic processes;stress response;signal transduction;other biological processes |
| P41091   | eukaryotic translation initiation factor 2 subunit 3 [OS=Homo sapiens]     | EIF2S3 | 7  | 126 | 7  | 20 | 36.636 | cell organization and biogenesis;protein metabolism;other metabolic processes;other biological processes                                     |
| Q14152   | Eukaryotic translation initiation factor 3 subunit A [OS=Homo sapiens]     | EIF3A  | 8  | 98  | 8  | 5  | 32.857 | cell organization and biogenesis;protein metabolism;other metabolic processes;other biological processes                                     |



|          |                                                                                     |        |    |     |    |    |        |                                                                                                                                                                                                                     |
|----------|-------------------------------------------------------------------------------------|--------|----|-----|----|----|--------|---------------------------------------------------------------------------------------------------------------------------------------------------------------------------------------------------------------------|
| B5ME19   | eukaryotic translation initiation factor 3 subunit C-like protein [OS=Homo sapiens] | EIF3CL | 5  | 157 | 5  | 6  | 28.244 | cell organization and biogenesis;protein metabolism;other metabolic processes                                                                                                                                       |
| Q15371   | Eukaryotic translation initiation factor 3 subunit D [OS=Homo sapiens]              | EIF3D  | 3  | 51  | 3  | 6  | 15.679 | cell organization and biogenesis;protein metabolism;other metabolic processes;other biological processes                                                                                                            |
| P60228   | Eukaryotic translation initiation factor 3 subunit E [OS=Homo sapiens]              | EIF3E  | 4  | 84  | 4  | 8  | 14.787 | cell organization and biogenesis;protein metabolism;RNA metabolism OR transcription;other metabolic processes;other biological processes                                                                            |
| Q15717   | ELAV-like protein 1 [OS=Homo sapiens]                                               | ELAVL1 | 5  | 88  | 5  | 16 | 24.902 | cell organization and biogenesis;transport;other biological processes                                                                                                                                               |
| P29317   | Ephrin type-A receptor 2 [OS=Homo sapiens]                                          | EPHA2  | 2  | 44  | 2  | 2  | 8.495  | cell adhesion;cell cycle OR cell proliferation;cell organization and biogenesis;protein metabolism;other metabolic processes;stress response;developmental processes;signal transduction;other biological processes |
| P07814   | Bifunctional glutamate/proline--tRNA ligase [OS=Homo sapiens]                       | EPRS1  | 17 | 302 | 17 | 14 | 74.503 | cell organization and biogenesis;protein metabolism;RNA metabolism OR transcription;other metabolic processes;stress response;other biological processes                                                            |
| Q9NZ08-1 | endoplasmic reticulum aminopeptidase 1 [OS=Homo sapiens]                            | ERAP1  | 5  | 86  | 5  | 5  | 24.398 | protein metabolism;other metabolic processes;developmental processes;signal transduction;other biological processes                                                                                                 |
| Q6P179   | Endoplasmic reticulum aminopeptidase 2 [OS=Homo sapiens]                            | ERAP2  | 4  | 53  | 4  | 4  | 16.112 | protein metabolism;other metabolic processes;signal transduction;other biological processes                                                                                                                         |
| Q969X5   | Endoplasmic reticulum-Golgi intermediate compartment protein 1 [OS=Homo sapiens]    | ERGIC1 | 3  | 64  | 3  | 11 | 11.349 | transport                                                                                                                                                                                                           |
| O75477   | erlin-1 [OS=Homo sapiens]                                                           | ERLIN1 | 5  | 96  | 2  | 16 | 25.842 |                                                                                                                                                                                                                     |
| Q9BS26   | Endoplasmic reticulum resident protein 44 [OS=Homo sapiens]                         | ERP44  | 4  | 37  | 3  | 9  | 14.152 | protein metabolism;other metabolic processes;stress response;other biological processes                                                                                                                             |

|          |                                                                                  |                    |    |     |    |    |         |                                                                                                                                           |
|----------|----------------------------------------------------------------------------------|--------------------|----|-----|----|----|---------|-------------------------------------------------------------------------------------------------------------------------------------------|
| Q9BSJ8   | Extended synaptotagmin-1<br>[OS=Homo sapiens]                                    | ESYT1              | 8  | 112 | 8  | 8  | 34.977  | cell organization and biogenesis;transport                                                                                                |
| P62495   | Eukaryotic peptide chain release factor subunit 1<br>[OS=Homo sapiens]           | ETF1               | 4  | 61  | 4  | 9  | 22.653  | cell organization and biogenesis;protein metabolism;RNA metabolism OR transcription;other metabolic processes;other biological processes  |
| P13804-1 | Electron transfer flavoprotein subunit alpha, mitochondrial<br>[OS=Homo sapiens] | ETFA               | 3  | 64  | 3  | 13 | 12.476  | other metabolic processes                                                                                                                 |
| P38117   | electron transfer flavoprotein subunit beta [OS=Homo sapiens]                    | ETFB               | 3  | 45  | 3  | 12 | 9.761   | other metabolic processes                                                                                                                 |
| Q9NZB2-1 | Constitutive coactivator of PPAR-gamma-like protein 1<br>[OS=Homo sapiens]       | FAM120 A           | 4  | 66  | 4  | 4  | 14.434  |                                                                                                                                           |
| P22570   | NADPH:adrenodoxin oxidoreductase, mitochondrial<br>[OS=Homo sapiens]             | FDXR               | 4  | 34  | 4  | 9  | 15.181  | other metabolic processes                                                                                                                 |
| Q96AC1   | Fermitin family homolog 2<br>[OS=Homo sapiens]                                   | FERMT 2            | 2  | 37  | 2  | 5  | 8.746   | cell adhesion;cell-cell signaling;cell organization and biogenesis;developmental processes;signal transduction;other biological processes |
| Q86UX7   | Fermitin family homolog 3<br>[OS=Homo sapiens]                                   | FERMT 3            | 9  | 159 | 9  | 18 | 48.181  | cell adhesion;cell organization and biogenesis;signal transduction;other biological processes                                             |
| P07954   | fumarate hydratase, mitochondrial [OS=Homo sapiens]                              | FH                 | 4  | 55  | 4  | 10 | 17.535  | DNA metabolism;other metabolic processes;stress response;other biological processes                                                       |
| Q14315   | Filamin-C [OS=Homo sapiens]                                                      | FLNC               | 28 | 392 | 21 | 13 | 150.434 | cell organization and biogenesis;other biological processes                                                                               |
| O75955   | Flotillin-1 [OS=Homo sapiens]                                                    | FLOT1              | 2  | 27  | 2  | 5  | 6.764   | cell organization and biogenesis;stress response;transport;developmental processes;signal transduction;other biological processes         |
| Q14697-1 | Neutral alpha-glucosidase AB<br>[OS=Homo sapiens]                                | GANAB; HEL-S-164nA | 16 | 455 | 16 | 18 | 85.53   | protein metabolism;other metabolic processes                                                                                              |

|          |                                                                                              |                        |    |     |    |    |        |                                                                                                                                                                                                                         |
|----------|----------------------------------------------------------------------------------------------|------------------------|----|-----|----|----|--------|-------------------------------------------------------------------------------------------------------------------------------------------------------------------------------------------------------------------------|
| P41250   | Glycine--tRNA ligase<br>[OS=Homo sapiens]                                                    | GARS1                  | 4  | 29  | 4  | 5  | 14.713 | protein metabolism;RNA metabolism<br>OR transcription;other metabolic<br>processes                                                                                                                                      |
| Q04446   | 1,4-alpha-glucan-branching<br>enzyme [OS=Homo sapiens]                                       | GBE1                   | 3  | 35  | 3  | 5  | 8.395  | other metabolic processes;other<br>biological processes                                                                                                                                                                 |
| Q92616   | eIF-2-alpha kinase activator<br>GCN1 [OS=Homo sapiens]                                       | GCN1                   | 21 | 233 | 21 | 8  | 92.42  | protein metabolism;other metabolic<br>processes;stress response;other<br>biological processes                                                                                                                           |
| P50395-1 | Rab GDP dissociation inhibitor<br>beta [OS=Homo sapiens]                                     | GDI2                   | 13 | 264 | 10 | 34 | 68.152 | transport;signal transduction                                                                                                                                                                                           |
| P57678   | Gem-associated protein 4<br>[OS=Homo sapiens]                                                | GEMIN4                 | 2  | 17  | 2  | 1  | 8.142  | cell organization and<br>biogenesis;RNA metabolism OR<br>transcription;other metabolic<br>processes                                                                                                                     |
| Q06210-1 | glutamine--fructose-6-<br>phosphate aminotransferase<br>[isomerizing] 1 [OS=Homo<br>sapiens] | GFPT1                  | 7  | 79  | 7  | 13 | 24.928 | protein metabolism;other metabolic<br>processes;other biological<br>processes                                                                                                                                           |
| Q13630   | GDP-L-fucose synthase<br>[OS=Homo sapiens]                                                   | GFUS                   | 2  | 58  | 2  | 6  | 8.602  | cell adhesion;other metabolic<br>processes;other biological<br>processes                                                                                                                                                |
| Q96F15   | GTPase IMAP family member 5<br>[OS=Homo sapiens]                                             | GIMAP5                 | 3  | 83  | 3  | 13 | 18.453 |                                                                                                                                                                                                                         |
| Q8ND71   | GTPase IMAP family member 8<br>[OS=Homo sapiens]                                             | GIMAP8                 | 2  | 19  | 2  | 4  | 7.168  | other biological processes                                                                                                                                                                                              |
| P00367   | Glutamate dehydrogenase 1,<br>mitochondrial [OS=Homo<br>sapiens]                             | GLUD1                  | 7  | 112 | 7  | 17 | 33.848 | other metabolic processes;other<br>biological processes                                                                                                                                                                 |
| P04899-1 | guanine nucleotide-binding<br>protein G(i) subunit alpha-2<br>[OS=Homo sapiens]              | GNAI2                  | 8  | 150 | 3  | 26 | 33.789 | cell-cell signaling;cell cycle OR cell<br>proliferation;signal<br>transduction;other biological<br>processes                                                                                                            |
| P07203   | Glutathione peroxidase 1<br>[OS=Homo sapiens]                                                | GPX1                   | 4  | 42  | 4  | 25 | 17.016 | cell cycle OR cell proliferation;cell<br>organization and biogenesis;protein<br>metabolism;other metabolic<br>processes;stress<br>response;developmental<br>processes;signal transduction;other<br>biological processes |
| Q9Y2Q3-1 | Glutathione S-transferase<br>kappa 1 [OS=Homo sapiens]                                       | GSTK1;<br>LOC510<br>64 | 2  | 47  | 2  | 13 | 14.913 | other metabolic processes;other<br>biological processes                                                                                                                                                                 |

|          |                                                                            |                   |    |     |   |    |        |                                                                                                                               |
|----------|----------------------------------------------------------------------------|-------------------|----|-----|---|----|--------|-------------------------------------------------------------------------------------------------------------------------------|
| P69905   | Hemoglobin subunit alpha [OS=Homo sapiens]                                 | HBA1; HBA2        | 5  | 227 | 5 | 32 | 32.704 | other metabolic processes;stress response;transport;other biological processes                                                |
| Q00341-1 | Vigilin [OS=Homo sapiens]                                                  | HDLBP             | 8  | 88  | 8 | 8  | 36.179 | other metabolic processes;transport                                                                                           |
| O14818-1 | Proteasome subunit alpha type-7 [OS=Homo sapiens]                          | HEL-S-276; PSMA7  | 3  | 53  | 3 | 14 | 16.388 | protein metabolism;other metabolic processes                                                                                  |
| P34897-1 | Serine hydroxymethyltransferase, mitochondrial [OS=Homo sapiens]           | HEL-S-51e; SHMT2  | 9  | 239 | 9 | 18 | 46.964 | cell organization and biogenesis;protein metabolism;other metabolic processes;stress response;other biological processes      |
| P35914   | Hydroxymethylglutaryl-CoA lyase, mitochondrial [OS=Homo sapiens]           | HMGCL             | 2  | 29  | 2 | 6  | 7.69   | cell organization and biogenesis;other metabolic processes;stress response;developmental processes;other biological processes |
| Q32P51   | Heterogeneous nuclear ribonucleoprotein A1-like 2 [OS=Homo sapiens]        | HNRNP A1L2        | 6  | 158 | 3 | 16 | 30.306 | RNA metabolism OR transcription;other metabolic processes;transport                                                           |
| P51991-1 | Heterogeneous nuclear ribonucleoprotein A3 [OS=Homo sapiens]               | HNRNP A3; HNRPA 3 | 4  | 89  | 1 | 7  | 16.674 | RNA metabolism OR transcription;other metabolic processes;transport                                                           |
| Q99729-2 | Isoform 2 of Heterogeneous nuclear ribonucleoprotein A/B [OS=Homo sapiens] | HNRNP AB          | 2  | 33  | 1 | 7  | 11.462 |                                                                                                                               |
| P07910-1 | Heterogeneous nuclear ribonucleoproteins C1/C2 [OS=Homo sapiens]           | HNRNP C           | 3  | 14  | 3 | 11 | 7.94   | RNA metabolism OR transcription;other metabolic processes;other biological processes                                          |
| P31943   | Heterogeneous nuclear ribonucleoprotein H [OS=Homo sapiens]                | HNRNP H1          | 11 | 237 | 3 | 31 | 58.454 | RNA metabolism OR transcription;other metabolic processes;other biological processes                                          |
| P31942   | Heterogeneous nuclear ribonucleoprotein H3 [OS=Homo sapiens]               | HNRNP H3          | 3  | 54  | 2 | 8  | 13.121 | RNA metabolism OR transcription;other metabolic processes;other biological processes                                          |
| P14866   | Heterogeneous nuclear ribonucleoprotein L [OS=Homo sapiens]                | HNRNP L           | 2  | 34  | 2 | 5  | 9.834  | RNA metabolism OR transcription;other metabolic                                                                               |

|          |                                                                                  |           |    |     |    |    |        |                                                                                                                                                                      |
|----------|----------------------------------------------------------------------------------|-----------|----|-----|----|----|--------|----------------------------------------------------------------------------------------------------------------------------------------------------------------------|
|          |                                                                                  |           |    |     |    |    |        | processes;other biological processes                                                                                                                                 |
| P52272   | Heterogeneous nuclear ribonucleoprotein M [OS=Homo sapiens]                      | HNRNP M   | 13 | 320 | 13 | 23 | 80.288 | RNA metabolism OR transcription;other metabolic processes;stress response                                                                                            |
| Q1KMD3   | heterogeneous nuclear ribonucleoprotein U-like protein 2 [OS=Homo sapiens]       | HNRNP UL2 | 5  | 61  | 5  | 7  | 25.467 |                                                                                                                                                                      |
| Q99714-1 | 3-hydroxyacyl-CoA dehydrogenase type-2 [OS=Homo sapiens]                         | HSD17 B10 | 5  | 79  | 5  | 29 | 22.658 | cell organization and biogenesis;RNA metabolism OR transcription;other metabolic processes                                                                           |
| Q53GQ0   | Very-long-chain 3-oxoacyl-CoA reductase [OS=Homo sapiens]                        | HSD17 B12 | 2  | 51  | 2  | 4  | 6.883  | cell organization and biogenesis;other metabolic processes;other biological processes                                                                                |
| P37059   | Estradiol 17-beta-dehydrogenase 2 [OS=Homo sapiens]                              | HSD17 B2  | 5  | 159 | 5  | 16 | 38.833 | other metabolic processes;developmental processes;other biological processes                                                                                         |
| P34932   | Heat shock 70 kDa protein 4 [OS=Homo sapiens]                                    | HSPA4     | 6  | 106 | 5  | 9  | 33.809 | cell organization and biogenesis;stress response;transport                                                                                                           |
| P41252   | isoleucine-tRNA ligase, cytoplasmic [OS=Homo sapiens]                            | IARS1     | 10 | 186 | 10 | 8  | 46.833 | protein metabolism;RNA metabolism OR transcription;other metabolic processes                                                                                         |
| P48735   | Isocitrate dehydrogenase [NADP], mitochondrial [OS=Homo sapiens]                 | IDH2      | 6  | 86  | 5  | 15 | 25.938 | other metabolic processes;developmental processes;other biological processes                                                                                         |
| Q16666-1 | gamma-interferon-inducible protein 16 [OS=Homo sapiens]                          | IFI16     | 3  | 39  | 3  | 4  | 12.22  | cell organization and biogenesis;protein metabolism;other metabolic processes;stress response;developmental processes;signal transduction;other biological processes |
| Q70UQ0   | Inhibitor of nuclear factor kappa-B kinase-interacting protein [OS=Homo sapiens] | IKBIP     | 3  | 39  | 3  | 8  | 13.348 | other biological processes                                                                                                                                           |
| O00410   | Importin-5 [OS=Homo sapiens]                                                     | IPO5      | 8  | 96  | 8  | 8  | 41.722 | transport;other biological processes                                                                                                                                 |
| Q96P70   | Importin-9 [OS=Homo sapiens]                                                     | IPO9      | 3  | 23  | 3  | 4  | 13.692 | transport                                                                                                                                                            |

|          |                                                                                                |          |    |     |   |    |        |                                                                                                                                                          |
|----------|------------------------------------------------------------------------------------------------|----------|----|-----|---|----|--------|----------------------------------------------------------------------------------------------------------------------------------------------------------|
| Q14573   | Inositol 1,4,5-trisphosphate receptor type 3 [OS=Homo sapiens]                                 | ITPR3    | 3  | 28  | 3 | 1  | 9.312  | transport;signal transduction;other biological processes                                                                                                 |
| P14923   | Junction plakoglobin [OS=Homo sapiens]                                                         | JUP      | 11 | 107 | 9 | 15 | 44.25  | cell adhesion;cell organization and biogenesis;developmental processes;other biological processes                                                        |
| Q15046   | Lysine--tRNA ligase [OS=Homo sapiens]                                                          | KARS1    | 5  | 48  | 5 | 8  | 19.229 | protein metabolism;RNA metabolism OR transcription;other metabolic processes;signal transduction;other biological processes                              |
| Q07666   | KH domain-containing, RNA-binding, signal transduction-associated protein 1 [OS=Homo sapiens]  | KHDRB S1 | 3  | 49  | 3 | 6  | 10.77  | cell cycle OR cell proliferation;RNA metabolism OR transcription;other metabolic processes;signal transduction;other biological processes                |
| P33176   | Kinesin-1 heavy chain [OS=Homo sapiens]                                                        | KIF5B    | 5  | 53  | 5 | 7  | 25.335 | cell organization and biogenesis;stress response;transport;developmental processes;other biological processes                                            |
| Q14974   | Importin subunit beta-1 [OS=Homo sapiens]                                                      | KPNB1    | 7  | 151 | 7 | 8  | 34.649 | cell cycle OR cell proliferation;cell organization and biogenesis;transport;signal transduction;other biological processes                               |
| Q9P2J5   | Leucine--tRNA ligase, cytoplasmic [OS=Homo sapiens]                                            | LARS1    | 9  | 111 | 9 | 10 | 32.557 | cell organization and biogenesis;protein metabolism;RNA metabolism OR transcription;other metabolic processes;stress response;other biological processes |
| P09382   | Galectin-1 [OS=Homo sapiens]                                                                   | LGALS1   | 4  | 77  | 4 | 40 | 32.869 | stress response;developmental processes;other biological processes                                                                                       |
| P48059-3 | Isoform 3 of LIM and senescent cell antigen-like-containing domain protein 1 [OS=Homo sapiens] | LIMS1    | 6  | 104 | 6 | 18 | 23.923 |                                                                                                                                                          |
| Q12907   | Vesicular integral-membrane protein VIP36 [OS=Homo sapiens]                                    | LMAN2    | 3  | 61  | 3 | 8  | 10.449 | cell organization and biogenesis;transport;other biological processes                                                                                    |

|          |                                                                            |                                           |    |     |    |    |         |                                                                                                                                                        |
|----------|----------------------------------------------------------------------------|-------------------------------------------|----|-----|----|----|---------|--------------------------------------------------------------------------------------------------------------------------------------------------------|
| P62847-1 | 40S ribosomal protein S24<br>[OS=Homo sapiens]                             | LOC100414020;<br>Rps24;<br>RPS24          | 3  | 48  | 3  | 26 | 18.627  | protein metabolism;RNA metabolism<br>OR transcription;other metabolic<br>processes;developmental<br>processes;other biological<br>processes            |
| P61019-1 | Ras-related protein Rab-2A<br>[OS=Homo sapiens]                            | LOC111155454;<br>RAB2;<br>Rab2a;<br>RAB2A | 5  | 75  | 5  | 31 | 31.404  | cell organization and<br>biogenesis;transport                                                                                                          |
| Q92973-1 | transportin-1 [OS=Homo sapiens]                                            | LOC112839541;<br>TNPO1                    | 6  | 112 | 6  | 7  | 28.684  | transport                                                                                                                                              |
| P42704   | Leucine-rich PPR motif-containing protein, mitochondrial [OS=Homo sapiens] | LRPPRC                                    | 20 | 227 | 20 | 15 | 94.596  | transport;other biological processes                                                                                                                   |
| P09960-1 | leukotriene A-4 hydrolase [OS=Homo sapiens]                                | LTA4H                                     | 5  | 51  | 5  | 8  | 29.019  | protein metabolism;other metabolic<br>processes                                                                                                        |
| O95372   | acyl-protein thioesterase 2 [OS=Homo sapiens]                              | LYPLA2                                    | 2  | 86  | 2  | 7  | 9.222   | cell organization and<br>biogenesis;protein metabolism;other<br>metabolic processes;developmental<br>processes                                         |
| Q9H0U3   | Magnesium transporter protein 1 [OS=Homo sapiens]                          | MAGT1                                     | 2  | 59  | 2  | 6  | 6.591   | protein metabolism;other metabolic<br>processes;transport;other biological<br>processes                                                                |
| P23368-1 | NAD-dependent malic enzyme, mitochondrial [OS=Homo sapiens]                | ME2                                       | 2  | 26  | 2  | 4  | 9.83    | other metabolic processes;other<br>biological processes                                                                                                |
| P11586   | C-1-tetrahydrofolate synthase, cytoplasmic [OS=Homo sapiens]               | MTHFD1                                    | 13 | 232 | 13 | 16 | 60.3    |                                                                                                                                                        |
| Q14764   | major vault protein [OS=Homo sapiens]                                      | MVP                                       | 11 | 75  | 11 | 15 | 47.226  | transport;signal transduction;other<br>biological processes                                                                                            |
| Q96S97   | myeloid-associated differentiation marker [OS=Homo sapiens]                | MYADM                                     | 2  | 81  | 2  | 10 | 17.723  | cell organization and<br>biogenesis;other biological<br>processes                                                                                      |
| P35579-1 | Myosin-9 [OS=Homo sapiens]                                                 | MYH9                                      | 29 | 324 | 26 | 16 | 110.307 | cell adhesion;cell cycle OR cell<br>proliferation;cell organization and<br>biogenesis;protein<br>metabolism;stress<br>response;transport;developmental |

|          |                                                                     |        |    |     |    |    |        |                                                                                                                     |
|----------|---------------------------------------------------------------------|--------|----|-----|----|----|--------|---------------------------------------------------------------------------------------------------------------------|
|          |                                                                     |        |    |     |    |    |        | processes;signal transduction;other biological processes                                                            |
| O14950   | Myosin regulatory light chain 12B [OS=Homo sapiens]                 | MYL12B | 3  | 111 | 3  | 17 | 13.803 | other biological processes                                                                                          |
| O94832   | Unconventional myosin-IId [OS=Homo sapiens]                         | MYO1D  | 8  | 55  | 7  | 8  | 24.3   | cell organization and biogenesis;transport;developmental processes;other biological processes                       |
| Q9UM54-1 | Isoform 1 of Unconventional myosin-VI [OS=Homo sapiens]             | MYO6   | 4  | 26  | 4  | 4  | 15.719 |                                                                                                                     |
| Q9UJ70   | N-acetyl-D-glucosamine kinase [OS=Homo sapiens]                     | NAGK   | 5  | 59  | 5  | 17 | 24.957 | other metabolic processes                                                                                           |
| P40261   | Nicotinamide N-methyltransferase [OS=Homo sapiens]                  | NNMT   | 2  | 29  | 2  | 7  | 8.883  | other metabolic processes;developmental processes;other biological processes                                        |
| Q13423   | NAD(P) transhydrogenase, mitochondrial [OS=Homo sapiens]            | NNT    | 10 | 199 | 10 | 11 | 48.691 | other metabolic processes;transport;other biological processes                                                      |
| Q15233   | Non-POU domain-containing octamer-binding protein [OS=Homo sapiens] | NONO   | 3  | 62  | 2  | 7  | 13.491 | DNA metabolism;RNA metabolism OR transcription;other metabolic processes;stress response;other biological processes |
| P55786   | puromycin-sensitive aminopeptidase [OS=Homo sapiens]                | NPEPPS | 9  | 146 | 9  | 10 | 42.713 | protein metabolism;other metabolic processes;stress response                                                        |
| P46459   | Vesicle-fusing ATPase [OS=Homo sapiens]                             | NSF    | 4  | 38  | 4  | 6  | 14.502 | cell organization and biogenesis;transport;other biological processes                                               |
| Q8N1F7-1 | Nuclear pore complex protein Nup93 [OS=Homo sapiens]                | NUP93  | 5  | 26  | 5  | 6  | 12.593 | cell organization and biogenesis;other metabolic processes;transport;signal transduction;other biological processes |
| P22059   | Oxysterol-binding protein 1 [OS=Homo sapiens]                       | OSBP   | 3  | 25  | 3  | 5  | 13.585 | cell organization and biogenesis;other metabolic processes;transport;other biological processes                     |
| P07237   | Protein disulfide-isomerase [OS=Homo sapiens]                       | P4HB   | 8  | 143 | 8  | 17 | 49.718 | protein metabolism;other metabolic processes;stress response;signal transduction;other biological processes         |



|          |                                                                                   |           |    |     |    |    |         |                                                                                                                                                                                                  |
|----------|-----------------------------------------------------------------------------------|-----------|----|-----|----|----|---------|--------------------------------------------------------------------------------------------------------------------------------------------------------------------------------------------------|
| P43034   | Platelet-activating factor acetylhydrolase IB subunit alpha [OS=Homo sapiens]     | PAFAH 1B1 | 4  | 61  | 3  | 13 | 16.235  | cell-cell signaling;cell cycle OR cell proliferation;cell organization and biogenesis;other metabolic processes;transport;developmental processes;signal transduction;other biological processes |
| Q15102   | Platelet-activating factor acetylhydrolase IB subunit gamma [OS=Homo sapiens]     | PAFAH 1B3 | 2  | 53  | 2  | 8  | 9.352   | other metabolic processes;developmental processes;other biological processes                                                                                                                     |
| P22234   | multifunctional protein ADE2 [OS=Homo sapiens]                                    | PAICS     | 5  | 55  | 5  | 13 | 19.613  | other metabolic processes                                                                                                                                                                        |
| Q13177   | Serine/threonine-protein kinase PAK 2 [OS=Homo sapiens]                           | PAK2      | 3  | 28  | 3  | 7  | 10.556  | cell organization and biogenesis;protein metabolism;other metabolic processes;developmental processes;signal transduction;other biological processes                                             |
| O95340   | bifunctional 3'-phosphoadenosine 5'-phosphosulfate synthase 2 [OS=Homo sapiens]   | PAPSS 2   | 3  | 47  | 3  | 6  | 14.532  | other metabolic processes;developmental processes                                                                                                                                                |
| Q8WUM4   | Programmed cell death 6-interacting protein [OS=Homo sapiens]                     | PDCD6I P  | 19 | 355 | 19 | 25 | 104.345 | cell cycle OR cell proliferation;cell organization and biogenesis;protein metabolism;other metabolic processes;transport;other biological processes                                              |
| O00408-1 | cGMP-dependent 3',5'-cyclic phosphodiesterase [OS=Homo sapiens]                   | PDE2A     | 4  | 50  | 4  | 5  | 18.11   | other metabolic processes;developmental processes;signal transduction;other biological processes                                                                                                 |
| P11177   | Pyruvate dehydrogenase E1 component subunit beta, mitochondrial [OS=Homo sapiens] | PDHB      | 4  | 92  | 4  | 11 | 15.772  | other metabolic processes                                                                                                                                                                        |
| P13667   | Protein disulfide-isomerase A4 [OS=Homo sapiens]                                  | PDIA4     | 6  | 65  | 6  | 12 | 28.366  | stress response;transport;other biological processes                                                                                                                                             |
| Q14554   | Protein disulfide-isomerase A5 [OS=Homo sapiens]                                  | PDIA5     | 4  | 82  | 4  | 7  | 17.309  | other metabolic processes;other biological processes                                                                                                                                             |
| P17858-1 | ATP-dependent 6-phosphofructokinase, liver type [OS=Homo sapiens]                 | PFKL      | 5  | 126 | 3  | 9  | 37.601  | other metabolic processes;other biological processes                                                                                                                                             |

|          |                                                                       |        |    |     |    |    |         |                                                                                                                                                                                              |
|----------|-----------------------------------------------------------------------|--------|----|-----|----|----|---------|----------------------------------------------------------------------------------------------------------------------------------------------------------------------------------------------|
| Q01813   | ATP-dependent 6-phosphofructokinase, platelet type [OS=Homo sapiens]  | PFKP   | 14 | 296 | 12 | 21 | 97.938  | other metabolic processes;other biological processes                                                                                                                                         |
| Q96G03   | Phosphoglucosyltransferase-2 [OS=Homo sapiens]                        | PGM2   | 6  | 64  | 6  | 10 | 25.959  | other metabolic processes                                                                                                                                                                    |
| Q6PCE3   | glucose 1,6-bisphosphate synthase [OS=Homo sapiens]                   | PGM2L1 | 5  | 51  | 5  | 9  | 15.279  | other metabolic processes                                                                                                                                                                    |
| P35232   | Prohibitin [OS=Homo sapiens]                                          | PHB    | 8  | 278 | 8  | 29 | 50.791  | cell organization and biogenesis;protein metabolism;DNA metabolism;other metabolic processes;stress response;signal transduction;other biological processes                                  |
| Q99623   | Prohibitin-2 [OS=Homo sapiens]                                        | PHB2   | 9  | 147 | 9  | 33 | 47.553  | cell cycle OR cell proliferation;cell organization and biogenesis;other metabolic processes;stress response;transport;developmental processes;signal transduction;other biological processes |
| Q92508   | Piezo-type mechanosensitive ion channel component 1 [OS=Homo sapiens] | PIEZO1 | 7  | 33  | 7  | 4  | 26.49   | transport;other biological processes                                                                                                                                                         |
| Q15149-1 | plectin [OS=Homo sapiens]                                             | PLEC   | 43 | 556 | 43 | 10 | 187.923 | cell cycle OR cell proliferation;cell organization and biogenesis;other metabolic processes;stress response;developmental processes;other biological processes                               |
| Q02809   | Procollagen-lysine,2-oxoglutarate 5-dioxygenase 1 [OS=Homo sapiens]   | PLOD1  | 6  | 94  | 6  | 11 | 25.389  | protein metabolism;other metabolic processes;stress response;other biological processes                                                                                                      |
| Q60568   | Procollagen-lysine,2-oxoglutarate 5-dioxygenase 3 [OS=Homo sapiens]   | PLOD3  | 4  | 40  | 4  | 5  | 18.912  | cell organization and biogenesis;protein metabolism;other metabolic processes;developmental processes;other biological processes                                                             |
| P29590   | Protein PML [OS=Homo sapiens]                                         | PML    | 7  | 129 | 7  | 8  | 31.31   | cell cycle OR cell proliferation;cell organization and biogenesis;protein metabolism;other metabolic processes;stress response;transport;developmental                                       |

|          |                                                                             |        |   |     |   |    |        |                                                                                                                                           |
|----------|-----------------------------------------------------------------------------|--------|---|-----|---|----|--------|-------------------------------------------------------------------------------------------------------------------------------------------|
|          |                                                                             |        |   |     |   |    |        | processes;signal transduction;other biological processes                                                                                  |
| P49593   | Protein phosphatase 1F [OS=Homo sapiens]                                    | PPM1F  | 3 | 65  | 3 | 9  | 18.586 | protein metabolism;other metabolic processes;signal transduction;other biological processes                                               |
| P32119   | Peroxiredoxin-2 [OS=Homo sapiens]                                           | PRDX2  | 5 | 169 | 4 | 24 | 30.373 | cell cycle OR cell proliferation;other metabolic processes;stress response;developmental processes;other biological processes             |
| P30044-1 | Peroxiredoxin-5, mitochondrial [OS=Homo sapiens]                            | PRDX5  | 5 | 87  | 5 | 30 | 24.002 | other metabolic processes;stress response;other biological processes                                                                      |
| Q13131   | 5'-AMP-activated protein kinase catalytic subunit alpha-1 [OS=Homo sapiens] | PRKAA1 | 2 | 54  | 2 | 5  | 12.361 | cell-cell signaling;protein metabolism;other metabolic processes;stress response;transport;signal transduction;other biological processes |
| Q6P2Q9   | Pre-mRNA-processing-splicing factor 8 [OS=Homo sapiens]                     | PRPF8  | 8 | 108 | 8 | 3  | 34.662 | cell organization and biogenesis;protein metabolism;RNA metabolism OR transcription;other metabolic processes;other biological processes  |
| P25789   | Proteasome subunit alpha type-4 [OS=Homo sapiens]                           | PSMA4  | 4 | 80  | 4 | 16 | 21.709 | protein metabolism;other metabolic processes                                                                                              |
| P49721   | proteasome subunit beta type-2 [OS=Homo sapiens]                            | PSMB2  | 3 | 88  | 3 | 16 | 17.934 | protein metabolism;other metabolic processes;other biological processes                                                                   |
| P28070   | Proteasome subunit beta type-4 [OS=Homo sapiens]                            | PSMB4  | 3 | 67  | 3 | 10 | 13.308 | protein metabolism;other metabolic processes;other biological processes                                                                   |
| P28074-1 | proteasome subunit beta type-5 [OS=Homo sapiens]                            | PSMB5  | 3 | 47  | 2 | 12 | 13.154 | protein metabolism;other metabolic processes;stress response                                                                              |
| P62191   | 26S proteasome regulatory subunit 4 [OS=Homo sapiens]                       | PSMC1  | 4 | 50  | 3 | 13 | 19.785 | protein metabolism;other metabolic processes;other biological processes                                                                   |
| P35998   | 26S proteasome regulatory subunit 7 [OS=Homo sapiens]                       | PSMC2  | 7 | 125 | 6 | 15 | 25.783 | protein metabolism;other metabolic processes;other biological processes                                                                   |
| P17980   | 26S proteasome regulatory subunit 6A [OS=Homo sapiens]                      | PSMC3  | 4 | 41  | 4 | 12 | 14.271 | protein metabolism;other metabolic processes;other biological processes                                                                   |

|          |                                                                    |            |    |     |    |    |        |                                                                                                                                              |
|----------|--------------------------------------------------------------------|------------|----|-----|----|----|--------|----------------------------------------------------------------------------------------------------------------------------------------------|
| P43686   | 26S proteasome regulatory subunit 6B [OS=Homo sapiens]             | PSMC4      | 4  | 41  | 4  | 13 | 16.955 | protein metabolism;other metabolic processes;developmental processes;other biological processes                                              |
| P62333   | 26S proteasome regulatory subunit 10B [OS=Homo sapiens]            | PSMC6      | 4  | 27  | 4  | 12 | 15.029 | protein metabolism;other metabolic processes;stress response;other biological processes                                                      |
| Q99460   | 26S proteasome non-ATPase regulatory subunit 1 [OS=Homo sapiens]   | PSMD1      | 5  | 69  | 5  | 6  | 15.894 | protein metabolism;other metabolic processes;other biological processes                                                                      |
| O00232-1 | 26S proteasome non-atpase regulatory subunit 12 [OS=Homo sapiens]  | PSMD1<br>2 | 4  | 26  | 4  | 10 | 11.278 | protein metabolism;other metabolic processes                                                                                                 |
| Q9UNM6   | 26S proteasome non-ATPase regulatory subunit 13 [OS=Homo sapiens]  | PSMD1<br>3 | 8  | 146 | 8  | 18 | 31.616 | cell cycle OR cell proliferation;cell organization and biogenesis;protein metabolism;other metabolic processes                               |
| O00487   | 26S proteasome non-ATPase regulatory subunit 14 [OS=Homo sapiens]  | PSMD1<br>4 | 3  | 20  | 3  | 9  | 7.666  | protein metabolism;DNA metabolism;other metabolic processes;stress response;other biological processes                                       |
| Q13200   | 26S proteasome non-ATPase regulatory subunit 2 [OS=Homo sapiens]   | PSMD2      | 8  | 113 | 8  | 8  | 36.21  | protein metabolism;other metabolic processes;other biological processes                                                                      |
| O43242   | 26S proteasome non-ATPase regulatory subunit 3 [OS=Homo sapiens]   | PSMD3      | 7  | 94  | 7  | 13 | 30.829 | protein metabolism;other metabolic processes;other biological processes                                                                      |
| P26599   | Polypyrimidine tract-binding protein 1 [OS=Homo sapiens]           | PTBP1      | 4  | 58  | 4  | 9  | 17.976 | RNA metabolism OR transcription;other metabolic processes;other biological processes                                                         |
| P18031   | Tyrosine-protein phosphatase non-receptor type 1 [OS=Homo sapiens] | PTPN1      | 3  | 33  | 3  | 7  | 15.74  | cell organization and biogenesis;protein metabolism;other metabolic processes;stress response;signal transduction;other biological processes |
| Q92626   | peroxidasin homolog [OS=Homo sapiens]                              | PXDN       | 15 | 344 | 15 | 11 | 84.863 | cell organization and biogenesis;other metabolic processes;stress response;other biological processes                                        |
| P11216   | Glycogen phosphorylase, brain form [OS=Homo sapiens]               | PYGB       | 7  | 228 | 4  | 11 | 38.658 | other metabolic processes                                                                                                                    |

|          |                                                                          |                     |    |     |    |    |        |                                                                                                                                                                                  |
|----------|--------------------------------------------------------------------------|---------------------|----|-----|----|----|--------|----------------------------------------------------------------------------------------------------------------------------------------------------------------------------------|
| P47897   | glutamine--tRNA ligase<br>[OS=Homo sapiens]                              | QARS1               | 12 | 210 | 12 | 16 | 48.57  | protein metabolism;RNA metabolism<br>OR transcription;other metabolic<br>processes;developmental<br>processes;other biological<br>processes                                      |
| P62820   | Ras-related protein Rab-1A<br>[OS=Homo sapiens]                          | RAB1A               | 4  | 103 | 2  | 21 | 17.886 | cell adhesion;cell-cell signaling;cell<br>organization and biogenesis;other<br>metabolic processes;stress<br>response;transport;other biological<br>processes                    |
| O95716   | ras-related protein Rab-3D<br>[OS=Homo sapiens]                          | RAB3D               | 4  | 34  | 3  | 16 | 16.261 | protein metabolism;other metabolic<br>processes;transport;other biological<br>processes                                                                                          |
| P15153   | Ras-related C3 botulinum toxin<br>substrate 2 [OS=Homo sapiens]          | RAC2                | 5  | 181 | 2  | 27 | 27.539 | cell adhesion;cell organization and<br>biogenesis;transport;developmental<br>processes;signal transduction;other<br>biological processes                                         |
| P54136-1 | arginine--tRNA ligase,<br>cytoplasmic [OS=Homo<br>sapiens]               | RARS1               | 13 | 198 | 13 | 25 | 63.675 | protein metabolism;RNA metabolism<br>OR transcription;other metabolic<br>processes                                                                                               |
| Q8TC12   | Retinol dehydrogenase 11<br>[OS=Homo sapiens]                            | RDH11               | 2  | 33  | 2  | 8  | 7.725  | other metabolic processes;other<br>biological processes                                                                                                                          |
| P0DJD0   | RANBP2-like and GRIP<br>domain-containing protein 1<br>[OS=Homo sapiens] | RGPD1               | 2  | 21  | 2  | 1  | 7.395  | transport;other biological processes                                                                                                                                             |
| Q63HN8-4 | Isoform 2 of E3 ubiquitin-protein<br>ligase RNF213 [OS=Homo<br>sapiens]  | RNF213              | 15 | 128 | 15 | 3  | 54.589 |                                                                                                                                                                                  |
| P10155-1 | 60 kDa SS-A/Ro<br>ribonucleoprotein [OS=Homo<br>sapiens]                 | RO60;<br>TROVE<br>2 | 2  | 27  | 2  | 4  | 9.206  | cell organization and<br>biogenesis;RNA metabolism OR<br>transcription;other metabolic<br>processes;developmental<br>processes;signal transduction;other<br>biological processes |
| P62910   | 60S ribosomal protein L32<br>[OS=Homo sapiens]                           | RPL32               | 3  | 113 | 3  | 28 | 31.4   | protein metabolism;other metabolic<br>processes                                                                                                                                  |
| P18077   | 60S ribosomal protein L35a<br>[OS=Homo sapiens]                          | RPL35A              | 5  | 65  | 5  | 23 | 23.109 | protein metabolism;RNA metabolism<br>OR transcription;other metabolic<br>processes;other biological<br>processes                                                                 |
| P46777   | 60S ribosomal protein L5<br>[OS=Homo sapiens]                            | RPL5                | 10 | 281 | 10 | 37 | 67.975 | cell organization and<br>biogenesis;protein metabolism;RNA                                                                                                                       |

|          |                                                                                                       |                                               |   |     |   |    |        |                                                                                                                                                                               |
|----------|-------------------------------------------------------------------------------------------------------|-----------------------------------------------|---|-----|---|----|--------|-------------------------------------------------------------------------------------------------------------------------------------------------------------------------------|
|          |                                                                                                       |                                               |   |     |   |    |        | metabolism OR transcription;other metabolic processes;other biological processes                                                                                              |
| P32969   | 60S ribosomal protein L9<br>[OS=Homo sapiens]                                                         | RPL9;<br>RPL9P7<br>;<br>RPL9P8<br>;<br>RPL9P9 | 4 | 112 | 4 | 24 | 16.942 | protein metabolism;other metabolic processes                                                                                                                                  |
| P04844-1 | Dolichyl-<br>diphosphooligosaccharide--<br>protein glycosyltransferase<br>subunit 2 [OS=Homo sapiens] | RPN2                                          | 6 | 125 | 6 | 13 | 33.504 | protein metabolism;other metabolic processes;other biological processes                                                                                                       |
| P25398   | 40S ribosomal protein S12<br>[OS=Homo sapiens]                                                        | RPS12                                         | 4 | 99  | 4 | 32 | 24.652 | protein metabolism;other metabolic processes;other biological processes                                                                                                       |
| Q71UM5   | 40S ribosomal protein S27-like<br>[OS=Homo sapiens]                                                   | RPS27L                                        | 3 | 81  | 3 | 38 | 19.153 | cell cycle OR cell proliferation;cell organization and biogenesis;protein metabolism;other metabolic processes;stress response;signal transduction;other biological processes |
| P62081   | 40S ribosomal protein S7<br>[OS=Homo sapiens]                                                         | RPS7                                          | 4 | 35  | 4 | 19 | 12.753 | protein metabolism;RNA metabolism OR transcription;other metabolic processes;developmental processes;other biological processes                                               |
| P10301   | Ras-related protein R-Ras<br>[OS=Homo sapiens]                                                        | RRAS                                          | 2 | 41  | 1 | 10 | 7.281  | developmental processes;signal transduction;other biological processes                                                                                                        |
| Q9P2E9-1 | Ribosome-binding protein 1<br>[OS=Homo sapiens]                                                       | RRBP1                                         | 3 | 22  | 3 | 3  | 13.588 |                                                                                                                                                                               |
| Q9Y3I0   | tRNA-splicing ligase RtcB<br>homolog [OS=Homo sapiens]                                                | RTCB                                          | 7 | 55  | 7 | 14 | 27.406 | RNA metabolism OR transcription;other metabolic processes                                                                                                                     |
| Q95197   | Reticulon-3 [OS=Homo sapiens]                                                                         | RTN3                                          | 2 | 37  | 2 | 2  | 8.876  | cell organization and biogenesis;transport;other biological processes                                                                                                         |
| Q9Y230   | RuvB-like 2 [OS=Homo sapiens]                                                                         | RUVBL<br>2                                    | 5 | 36  | 4 | 11 | 23.121 | cell organization and biogenesis;protein metabolism;DNA metabolism;other metabolic processes                                                                                  |

|          |                                                                           |           |    |     |    |    |        |                                                                                                                                                                                |
|----------|---------------------------------------------------------------------------|-----------|----|-----|----|----|--------|--------------------------------------------------------------------------------------------------------------------------------------------------------------------------------|
|          |                                                                           |           |    |     |    |    |        | processes;stress response;other biological processes                                                                                                                           |
| P49591   | Serine--tRNA ligase, cytoplasmic [OS=Homo sapiens]                        | SARS1     | 6  | 45  | 6  | 10 | 19.271 | protein metabolism;RNA metabolism OR transcription;other metabolic processes;other biological processes                                                                        |
| Q9Y3A5   | Ribosome maturation protein SBDS [OS=Homo sapiens]                        | SBDS      | 2  | 44  | 2  | 7  | 7.425  | cell cycle OR cell proliferation;cell organization and biogenesis;RNA metabolism OR transcription;other metabolic processes;developmental processes;other biological processes |
| P67812   | Signal peptidase complex catalytic subunit SEC11A [OS=Homo sapiens]       | SEC11A    | 2  | 54  | 2  | 9  | 8.084  | protein metabolism;other metabolic processes                                                                                                                                   |
| P55735-1 | protein SEC13 homolog [OS=Homo sapiens]                                   | SEC13     | 2  | 34  | 2  | 7  | 7.707  | cell organization and biogenesis;transport;other biological processes                                                                                                          |
| Q15436   | protein transport protein Sec23A [OS=Homo sapiens]                        | SEC23A    | 6  | 126 | 6  | 9  | 32.762 | cell organization and biogenesis;transport;other biological processes                                                                                                          |
| P53992   | Protein transport protein sec24c [OS=Homo sapiens]                        | SEC24 C   | 6  | 38  | 6  | 6  | 21.984 | cell organization and biogenesis;transport;developmental processes                                                                                                             |
| Q94979   | Protein transport protein Sec31A [OS=Homo sapiens]                        | SEC31A    | 6  | 21  | 6  | 5  | 18.636 | cell organization and biogenesis;transport;other biological processes                                                                                                          |
| P61619   | Protein transport protein Sec61 subunit alpha isoform 1 [OS=Homo sapiens] | SEC61A 1  | 5  | 87  | 5  | 9  | 24.94  | cell organization and biogenesis;stress response;transport;developmental processes                                                                                             |
| Q15019   | septin-2 [OS=Homo sapiens]                                                | SEPTIN 2  | 4  | 63  | 3  | 16 | 26.681 | cell cycle OR cell proliferation;cell organization and biogenesis;developmental processes;signal transduction;other biological processes                                       |
| P35237   | serpin B6 [OS=Homo sapiens]                                               | SERPIN B6 | 6  | 119 | 5  | 18 | 32.306 | stress response;other biological processes                                                                                                                                     |
| P50453   | Serpin B9 [OS=Homo sapiens]                                               | SERPIN B9 | 11 | 396 | 10 | 30 | 64.471 | other biological processes                                                                                                                                                     |
| Q9H9B4   | Sideroflexin-1 [OS=Homo sapiens]                                          | SFXN1     | 4  | 74  | 3  | 12 | 23.46  | other metabolic processes;transport                                                                                                                                            |

|          |                                                                         |          |    |     |    |    |        |                                                                                            |
|----------|-------------------------------------------------------------------------|----------|----|-----|----|----|--------|--------------------------------------------------------------------------------------------|
| Q15427   | Monocarboxylate transporter 4 [OS=Homo sapiens]                         | SLC16A3  | 3  | 63  | 3  | 6  | 15.833 | transport                                                                                  |
| P53007   | Tricarboxylate transport protein, mitochondrial [OS=Homo sapiens]       | SLC25A1  | 2  | 54  | 2  | 8  | 11.033 | other metabolic processes;transport                                                        |
| Q02978   | Mitochondrial 2-oxoglutarate/malate carrier protein [OS=Homo sapiens]   | SLC25A11 | 4  | 58  | 4  | 18 | 23.558 | transport                                                                                  |
| Q6NUK1   | Calcium-binding mitochondrial carrier protein SCaMC-1 [OS=Homo sapiens] | SLC25A24 | 3  | 40  | 3  | 7  | 11.446 | stress response;transport;other biological processes                                       |
| Q8NEW0   | Zinc transporter 7 [OS=Homo sapiens]                                    | SLC30A7  | 3  | 37  | 3  | 8  | 14.44  | transport;other biological processes                                                       |
| O75643-1 | U5 small nuclear ribonucleoprotein 200 kDa helicase [OS=Homo sapiens]   | SNRNP200 | 3  | 43  | 3  | 1  | 12.569 | cell organization and biogenesis;RNA metabolism OR transcription;other metabolic processes |
| Q13425-1 | Beta-2-syntrophin [OS=Homo sapiens]                                     | SNTB2    | 3  | 67  | 3  | 7  | 14.638 |                                                                                            |
| O60749   | Sorting nexin-2 [OS=Homo sapiens]                                       | SNX2     | 3  | 53  | 3  | 7  | 15.409 | cell organization and biogenesis;transport                                                 |
| Q15005   | Signal peptidase complex subunit 2 [OS=Homo sapiens]                    | SPCS2    | 2  | 19  | 2  | 7  | 7.274  | protein metabolism;other metabolic processes;transport                                     |
| Q13813   | Spectrin alpha chain, non-erythrocytic 1 [OS=Homo sapiens]              | SPTAN1   | 16 | 156 | 16 | 8  | 67.074 | cell organization and biogenesis                                                           |
| O15270   | Serine palmitoyltransferase 2 [OS=Homo sapiens]                         | SPTLC2   | 4  | 17  | 4  | 7  | 15.178 | other metabolic processes;developmental processes;other biological processes               |
| Q9Y6N5   | Sulfide:quinone oxidoreductase, mitochondrial [OS=Homo sapiens]         | SQOR     | 8  | 114 | 8  | 19 | 37.403 | other metabolic processes                                                                  |
| P30626-1 | Sorcin [OS=Homo sapiens]                                                | SRI      | 2  | 41  | 2  | 11 | 9.89   | transport;developmental processes;signal transduction;other biological processes           |
| P19623   | spermidine synthase [OS=Homo sapiens]                                   | SRM      | 6  | 53  | 6  | 23 | 19.942 | other metabolic processes;other biological processes                                       |
| Q13247   | Serine/arginine-rich splicing factor 6 [OS=Homo sapiens]                | SRSF6    | 2  | 32  | 2  | 5  | 7.952  | cell organization and biogenesis;RNA metabolism OR transcription;other metabolic           |



|          |                                                                                                |        |    |     |    |    |        |                                                                                                                                                                                             |
|----------|------------------------------------------------------------------------------------------------|--------|----|-----|----|----|--------|---------------------------------------------------------------------------------------------------------------------------------------------------------------------------------------------|
|          |                                                                                                |        |    |     |    |    |        | processes;other biological processes                                                                                                                                                        |
| Q86WV6   | Stimulator of interferon genes protein [OS=Homo sapiens]                                       | STING1 | 2  | 29  | 2  | 7  | 12.262 | cell organization and biogenesis;other metabolic processes;stress response;other biological processes                                                                                       |
| P31948   | stress-induced-phosphoprotein 1 [OS=Homo sapiens]                                              | STIP1  | 2  | 47  | 2  | 4  | 10.909 | other biological processes                                                                                                                                                                  |
| P46977   | Dolichyl-diphosphooligosaccharide--protein glycosyltransferase subunit STT3A [OS=Homo sapiens] | STT3A  | 5  | 211 | 5  | 7  | 25.658 | protein metabolism;other metabolic processes                                                                                                                                                |
| Q8TCJ2   | Dolichyl-diphosphooligosaccharide--protein glycosyltransferase subunit STT3B [OS=Homo sapiens] | STT3B  | 4  | 54  | 4  | 5  | 15.004 | protein metabolism;other metabolic processes;stress response                                                                                                                                |
| P53597   | Succinate--CoA ligase [ADP/GDP-forming] subunit alpha, mitochondrial [OS=Homo sapiens]         | SUCLG1 | 2  | 21  | 2  | 7  | 9.703  | other metabolic processes                                                                                                                                                                   |
| O15260-1 | surfeit locus protein 4 [OS=Homo sapiens]                                                      | SURF4  | 2  | 57  | 2  | 7  | 14.061 | cell organization and biogenesis;other biological processes                                                                                                                                 |
| P37802   | Transgelin-2 [OS=Homo sapiens]                                                                 | TAGLN2 | 3  | 69  | 3  | 16 | 16.72  | other biological processes                                                                                                                                                                  |
| Q03518   | Antigen peptide transporter 1 [OS=Homo sapiens]                                                | TAP1   | 3  | 39  | 3  | 5  | 16.089 | stress response;transport;other biological processes                                                                                                                                        |
| Q03519-1 | antigen peptide transporter 2 [OS=Homo sapiens]                                                | TAP2   | 3  | 24  | 3  | 4  | 11.299 | transport;other biological processes                                                                                                                                                        |
| P26639-1 | Threonine--tRNA ligase, cytoplasmic [OS=Homo sapiens]                                          | TARS1  | 11 | 96  | 11 | 16 | 37.105 | protein metabolism;RNA metabolism OR transcription;other metabolic processes                                                                                                                |
| Q13488   | V-type proton ATPase 116 kDa subunit a isoform 3 [OS=Homo sapiens]                             | TCIRG1 | 3  | 34  | 3  | 4  | 15.268 | cell cycle OR cell proliferation;cell organization and biogenesis;protein metabolism;other metabolic processes;stress response;transport;developmental processes;other biological processes |

|          |                                                                                     |            |    |      |   |    |         |                                                                                                                                                                                       |
|----------|-------------------------------------------------------------------------------------|------------|----|------|---|----|---------|---------------------------------------------------------------------------------------------------------------------------------------------------------------------------------------|
| P57088   | Transmembrane protein 33<br>[OS=Homo sapiens]                                       | TMEM3<br>3 | 3  | 103  | 3 | 11 | 13.351  | cell organization and biogenesis;stress response;other biological processes                                                                                                           |
| P67936   | Tropomyosin alpha-4 chain<br>[OS=Homo sapiens]                                      | TPM4       | 4  | 27   | 4 | 15 | 19.12   | cell organization and biogenesis;other biological processes                                                                                                                           |
| Q9Y5S1   | Transient receptor potential cation channel subfamily V member 2 [OS=Homo sapiens]  | TRPV2      | 7  | 50   | 7 | 11 | 29.879  | cell organization and biogenesis;stress response;transport;developmental processes;other biological processes                                                                         |
| P68366   | Tubulin alpha-4A chain<br>[OS=Homo sapiens]                                         | TUBA4<br>A | 14 | 2581 | 5 | 38 | 174.698 | cell cycle OR cell proliferation;cell organization and biogenesis                                                                                                                     |
| Q13885   | Tubulin beta-2A chain<br>[OS=Homo sapiens]                                          | TUBB2<br>A | 19 | 2413 | 3 | 45 | 211.734 | cell cycle OR cell proliferation;cell organization and biogenesis;developmental processes                                                                                             |
| Q3KQV9   | UDP-N-acetylhexosamine pyrophosphorylase-like protein 1 [OS=Homo sapiens]           | UAP1L1     | 2  | 38   | 2 | 5  | 7.659   | other metabolic processes                                                                                                                                                             |
| Q5JXB2   | Putative ubiquitin-conjugating enzyme E2 N-like [OS=Homo sapiens]                   | UBE2N<br>L | 2  | 65   | 2 | 14 | 11.74   | protein metabolism;other metabolic processes                                                                                                                                          |
| O60701   | UDP-glucose 6-dehydrogenase<br>[OS=Homo sapiens]                                    | UGDH       | 4  | 75   | 4 | 9  | 26.575  | cell organization and biogenesis;protein metabolism;other metabolic processes;developmental processes                                                                                 |
| Q9H3U1-2 | Isoform 2 of Protein unc-45 homolog A [OS=Homo sapiens]                             | UNC45<br>A | 3  | 49   | 3 | 3  | 13.425  |                                                                                                                                                                                       |
| P22695   | Cytochrome b-c1 complex subunit 2, mitochondrial<br>[OS=Homo sapiens]               | UQCRC<br>2 | 6  | 97   | 6 | 19 | 29.157  | protein metabolism;other metabolic processes;other biological processes                                                                                                               |
| O60763-1 | General vesicular transport factor p115 [OS=Homo sapiens]                           | USO1       | 9  | 100  | 9 | 11 | 38.484  | cell organization and biogenesis;transport;signal transduction;other biological processes                                                                                             |
| Q93008-1 | Isoform 2 of Probable ubiquitin carboxyl-terminal hydrolase FAF-X [OS=Homo sapiens] | USP9X      | 7  | 56   | 7 | 3  | 23.73   | cell cycle OR cell proliferation;cell organization and biogenesis;protein metabolism;other metabolic processes;developmental processes;signal transduction;other biological processes |

|          |                                                                       |        |    |     |    |    |        |                                                                                                                                              |
|----------|-----------------------------------------------------------------------|--------|----|-----|----|----|--------|----------------------------------------------------------------------------------------------------------------------------------------------|
| P26640   | Valine--tRNA ligase [OS=Homo sapiens]                                 | VAR51  | 8  | 100 | 8  | 8  | 34.593 | protein metabolism;RNA metabolism<br>OR transcription;other metabolic processes                                                              |
| P18206   | Vinculin [OS=Homo sapiens]                                            | VCL    | 10 | 114 | 10 | 10 | 38.461 | cell adhesion;cell organization and biogenesis;developmental processes;other biological processes                                            |
| Q9Y277   | Voltage-dependent anion-selective channel protein 3 [OS=Homo sapiens] | VDAC3  | 5  | 88  | 5  | 23 | 22.76  | transport;other biological processes                                                                                                         |
| Q709C8   | Vacuolar protein sorting-associated protein 13C [OS=Homo sapiens]     | VPS13C | 7  | 43  | 7  | 3  | 25.686 | cell organization and biogenesis;transport;other biological processes                                                                        |
| O75436-1 | Vacuolar protein sorting-associated protein 26A [OS=Homo sapiens]     | VPS26A | 2  | 30  | 2  | 9  | 7.773  | transport;other biological processes                                                                                                         |
| Q96QK1   | Vacuolar protein sorting-associated protein 35 [OS=Homo sapiens]      | VPS35  | 6  | 150 | 6  | 8  | 33.37  | cell-cell signaling;cell organization and biogenesis;transport;signal transduction;other biological processes                                |
| O76024   | Wolframin [OS=Homo sapiens]                                           | WFS1   | 4  | 95  | 4  | 4  | 21.135 | protein metabolism;other metabolic processes;stress response;developmental processes;signal transduction;other biological processes          |
| O14980   | Exportin-1 [OS=Homo sapiens]                                          | XPO1   | 7  | 70  | 7  | 7  | 21.401 | transport;other biological processes                                                                                                         |
| P12956   | X-ray repair cross-complementing protein 6 [OS=Homo sapiens]          | XRCC6  | 7  | 130 | 7  | 14 | 36.321 | cell organization and biogenesis;DNA metabolism;other metabolic processes;stress response;developmental processes;other biological processes |
| P07947   | tyrosine-protein kinase Yes [OS=Homo sapiens]                         | YES1   | 3  | 72  | 1  | 5  | 14.658 | protein metabolism;other metabolic processes;stress response;transport;signal transduction;other biological processes                        |
| P31946   | 14-3-3 protein beta/alpha [OS=Homo sapiens]                           | YWHAB  | 8  | 364 | 5  | 30 | 46.815 | transport;other biological processes                                                                                                         |
| Q04917   | 14-3-3 protein eta [OS=Homo sapiens]                                  | YWHAH  | 6  | 347 | 3  | 25 | 39.289 | other metabolic processes;transport;developmental                                                                                            |

|        |                                        |       |   |     |   |    |        |                                                          |
|--------|----------------------------------------|-------|---|-----|---|----|--------|----------------------------------------------------------|
|        |                                        |       |   |     |   |    |        | processes;signal transduction;other biological processes |
| P27348 | 14-3-3 protein theta [OS=Homo sapiens] | YWHAQ | 4 | 319 | 2 | 21 | 27.469 | transport;signal transduction;other biological processes |

Table S8. List of 46 proteins modified only by CIHDyA in both HLMVEC and EA.hy926 cells

| Accession | Description                                            | Gene Symbol | # Peptides | # PSMs | # Unique Peptides | Coverage [%] | Sum PEP Score | Biological Process                                                                                                                                                                                             |
|-----------|--------------------------------------------------------|-------------|------------|--------|-------------------|--------------|---------------|----------------------------------------------------------------------------------------------------------------------------------------------------------------------------------------------------------------|
| P09110    | 3-ketoacyl-CoA thiolase, peroxisomal [OS=Homo sapiens] | ACAA1       | 3          | 22     | 3                 | 13           | 22.974        | other metabolic processes                                                                                                                                                                                      |
| O95573    | long-chain-fatty-acid--CoA ligase 3 [OS=Homo sapiens]  | ACSL3       | 6          | 27     | 6                 | 9            | 21.406        | cell organization and biogenesis;other metabolic processes;transport;developmental processes;other biological processes                                                                                        |
| P00568    | Adenylate kinase isoenzyme 1 [OS=Homo sapiens]         | AK1         | 2          | 27     | 2                 | 12           | 10.902        | other metabolic processes                                                                                                                                                                                      |
| P20073    | Annexin A7 [OS=Homo sapiens]                           | ANXA7       | 2          | 22     | 2                 | 4            | 6.166         | cell organization and biogenesis;other metabolic processes;other biological processes                                                                                                                          |
| O94973    | AP-2 complex subunit alpha-2 [OS=Homo sapiens]         | AP2A2       | 6          | 64     | 3                 | 6            | 26.076        | transport                                                                                                                                                                                                      |
| O00203    | AP-3 complex subunit beta-1 [OS=Homo sapiens]          | AP3B1       | 3          | 23     | 3                 | 3            | 15.351        | cell organization and biogenesis;protein metabolism;RNA metabolism OR transcription;other metabolic processes;stress response;transport;developmental processes;signal transduction;other biological processes |

|        |                                                                        |        |   |    |   |    |        |                                                                                                                                                                                                                                   |
|--------|------------------------------------------------------------------------|--------|---|----|---|----|--------|-----------------------------------------------------------------------------------------------------------------------------------------------------------------------------------------------------------------------------------|
| P40616 | ADP-ribosylation factor-like protein 1 [OS=Homo sapiens]               | ARL1   | 3 | 37 | 3 | 19 | 13.498 | cell organization and biogenesis;other metabolic processes;transport;other biological processes                                                                                                                                   |
| Q6DD88 | Atlastin-3 [OS=Homo sapiens]                                           | ATL3   | 3 | 50 | 3 | 9  | 24.845 | cell organization and biogenesis;other biological processes                                                                                                                                                                       |
| P27824 | Calnexin [OS=Homo sapiens]                                             | CANX   | 3 | 26 | 3 | 6  | 13.919 | stress response;transport;signal transduction;other biological processes                                                                                                                                                          |
| P04040 | catalase [OS=Homo sapiens]                                             | CAT    | 4 | 34 | 4 | 9  | 23.855 | protein metabolism;other metabolic processes;stress response;developmental processes;other biological processes                                                                                                                   |
| Q6NZ12 | caveolae-associated protein 1 [OS=Homo sapiens]                        | CAVIN1 | 4 | 19 | 4 | 11 | 16.343 | RNA metabolism OR transcription;other metabolic processes;transport;other biological processes                                                                                                                                    |
| P21964 | Catechol O-methyltransferase [OS=Homo sapiens]                         | COMT   | 2 | 13 | 2 | 7  | 7.85   | other metabolic processes;stress response;other biological processes                                                                                                                                                              |
| P56545 | c-terminal-binding protein 2 [OS=Homo sapiens]                         | CTBP2  | 2 | 16 | 2 | 4  | 6.604  | cell-cell signaling;cell organization and biogenesis;transport;other biological processes                                                                                                                                         |
| P35222 | Catenin beta-1 [OS=Homo sapiens]                                       | CTNNB1 | 5 | 52 | 3 | 7  | 21.891 | cell adhesion;cell-cell signaling;cell cycle OR cell proliferation;cell organization and biogenesis;protein metabolism;other metabolic processes;transport;developmental processes;signal transduction;other biological processes |
| Q14152 | Eukaryotic translation initiation factor 3 subunit A [OS=Homo sapiens] | EIF3A  | 8 | 98 | 8 | 5  | 32.857 | cell organization and biogenesis;protein metabolism;other metabolic processes;other biological processes                                                                                                                          |

|        |                                                                                    |        |   |    |   |    |        |                                                                                                                                                                      |
|--------|------------------------------------------------------------------------------------|--------|---|----|---|----|--------|----------------------------------------------------------------------------------------------------------------------------------------------------------------------|
| P62495 | Eukaryotic peptide chain release factor subunit 1 [OS=Homo sapiens]                | ETF1   | 4 | 61 | 4 | 9  | 22.653 | cell organization and biogenesis;protein metabolism;RNA metabolism OR transcription;other metabolic processes;other biological processes                             |
| Q04446 | 1,4-alpha-glucan-branching enzyme [OS=Homo sapiens]                                | GBE1   | 3 | 35 | 3 | 5  | 8.395  | other metabolic processes;other biological processes                                                                                                                 |
| Q06210 | glutamine--fructose-6-phosphate aminotransferase [isomerizing] 1 [OS=Homo sapiens] | GFPT1  | 7 | 79 | 7 | 13 | 24.928 | protein metabolism;other metabolic processes;other biological processes                                                                                              |
| P14866 | Heterogeneous nuclear ribonucleoprotein L [OS=Homo sapiens]                        | HNRNPL | 2 | 34 | 2 | 5  | 9.834  | RNA metabolism OR transcription;other metabolic processes;other biological processes                                                                                 |
| Q16666 | gamma-interferon-inducible protein 16 [OS=Homo sapiens]                            | IFI16  | 3 | 39 | 3 | 4  | 12.22  | cell organization and biogenesis;protein metabolism;other metabolic processes;stress response;developmental processes;signal transduction;other biological processes |
| Q70UQ0 | Inhibitor of nuclear factor kappa-B kinase-interacting protein [OS=Homo sapiens]   | IKBIP  | 3 | 39 | 3 | 8  | 13.348 | other biological processes                                                                                                                                           |
| Q96P70 | Importin-9 [OS=Homo sapiens]                                                       | IPO9   | 3 | 23 | 3 | 4  | 13.692 | transport                                                                                                                                                            |
| Q15046 | Lysine--tRNA ligase [OS=Homo sapiens]                                              | KARS1  | 5 | 48 | 5 | 8  | 19.229 | protein metabolism;RNA metabolism OR transcription;other metabolic processes;signal transduction;other biological processes                                          |
| P09960 | leukotriene A-4 hydrolase [OS=Homo sapiens]                                        | LTA4H  | 5 | 51 | 5 | 8  | 29.019 | protein metabolism;other metabolic processes                                                                                                                         |
| Q8N1F7 | Nuclear pore complex protein Nup93 [OS=Homo sapiens]                               | NUP93  | 5 | 26 | 5 | 6  | 12.593 | cell organization and biogenesis;other metabolic processes;transport;signal                                                                                          |

|        |                                                                        |        |   |     |   |    |        |                                                                                                                                                      |
|--------|------------------------------------------------------------------------|--------|---|-----|---|----|--------|------------------------------------------------------------------------------------------------------------------------------------------------------|
|        |                                                                        |        |   |     |   |    |        | transduction;other biological processes                                                                                                              |
| Q13177 | Serine/threonine-protein kinase<br>PAK 2 [OS=Homo sapiens]             | PAK2   | 3 | 28  | 3 | 7  | 10.556 | cell organization and biogenesis;protein metabolism;other metabolic processes;developmental processes;signal transduction;other biological processes |
| Q14554 | Protein disulfide-isomerase A5<br>[OS=Homo sapiens]                    | PDIA5  | 4 | 82  | 4 | 7  | 17.309 | other metabolic processes;other biological processes                                                                                                 |
| P17858 | ATP-dependent 6-phosphofructokinase, liver type<br>[OS=Homo sapiens]   | PFKL   | 5 | 126 | 3 | 9  | 37.601 | other metabolic processes;other biological processes                                                                                                 |
| Q6PCE3 | glucose 1,6-bisphosphate synthase [OS=Homo sapiens]                    | PGM2L1 | 5 | 51  | 5 | 9  | 15.279 | other metabolic processes                                                                                                                            |
| O60568 | Procollagen-lysine,2-oxoglutarate 5-dioxygenase 3<br>[OS=Homo sapiens] | PLOD3  | 4 | 40  | 4 | 5  | 18.912 | cell organization and biogenesis;protein metabolism;other metabolic processes;developmental processes;other biological processes                     |
| P62191 | 26S proteasome regulatory subunit 4 [OS=Homo sapiens]                  | PSMC1  | 4 | 50  | 3 | 13 | 19.785 | protein metabolism;other metabolic processes;other biological processes                                                                              |
| P43686 | 26S proteasome regulatory subunit 6B [OS=Homo sapiens]                 | PSMC4  | 4 | 41  | 4 | 13 | 16.955 | protein metabolism;other metabolic processes;developmental processes;other biological processes                                                      |
| P62333 | 26S proteasome regulatory subunit 10B [OS=Homo sapiens]                | PSMC6  | 4 | 27  | 4 | 12 | 15.029 | protein metabolism;other metabolic processes;stress response;other biological processes                                                              |
| O00487 | 26S proteasome non-ATPase regulatory subunit 14 [OS=Homo sapiens]      | PSMD14 | 3 | 20  | 3 | 9  | 7.666  | protein metabolism;DNA metabolism;other metabolic processes;stress response;other biological processes                                               |

|        |                                                                                                |          |   |     |   |    |        |                                                                                                                                                                                       |
|--------|------------------------------------------------------------------------------------------------|----------|---|-----|---|----|--------|---------------------------------------------------------------------------------------------------------------------------------------------------------------------------------------|
| Q13200 | 26S proteasome non-ATPase regulatory subunit 2 [OS=Homo sapiens]                               | PSMD2    | 8 | 113 | 8 | 8  | 36.21  | protein metabolism;other metabolic processes;other biological processes                                                                                                               |
| P53992 | Protein transport protein sec24c [OS=Homo sapiens]                                             | SEC24C   | 6 | 38  | 6 | 6  | 21.984 | cell organization and biogenesis;transport;developmental processes                                                                                                                    |
| Q6NUK1 | Calcium-binding mitochondrial carrier protein SCaMC-1 [OS=Homo sapiens]                        | SLC25A24 | 3 | 40  | 3 | 7  | 11.446 | stress response;transport;other biological processes                                                                                                                                  |
| P19623 | spermidine synthase [OS=Homo sapiens]                                                          | SRM      | 6 | 53  | 6 | 23 | 19.942 | other metabolic processes;other biological processes                                                                                                                                  |
| P31948 | stress-induced-phosphoprotein 1 [OS=Homo sapiens]                                              | STIP1    | 2 | 47  | 2 | 4  | 10.909 | other biological processes                                                                                                                                                            |
| Q8TCJ2 | Dolichyl-diphosphooligosaccharide--protein glycosyltransferase subunit STT3B [OS=Homo sapiens] | STT3B    | 4 | 54  | 4 | 5  | 15.004 | protein metabolism;other metabolic processes;stress response                                                                                                                          |
| P53597 | Succinate--CoA ligase [ADP/GDP-forming] subunit alpha, mitochondrial [OS=Homo sapiens]         | SUCLG1   | 2 | 21  | 2 | 7  | 9.703  | other metabolic processes                                                                                                                                                             |
| Q9H3U1 | Isoform 2 of Protein unc-45 homolog A [OS=Homo sapiens]                                        | UNC45A   | 3 | 49  | 3 | 3  | 13.425 |                                                                                                                                                                                       |
| O60763 | General vesicular transport factor p115 [OS=Homo sapiens]                                      | USO1     | 9 | 100 | 9 | 11 | 38.484 | cell organization and biogenesis;transport;signal transduction;other biological processes                                                                                             |
| Q93008 | Isoform 2 of Probable ubiquitin carboxyl-terminal hydrolase FAF-X [OS=Homo sapiens]            | USP9X    | 7 | 56  | 7 | 3  | 23.73  | cell cycle OR cell proliferation;cell organization and biogenesis;protein metabolism;other metabolic processes;developmental processes;signal transduction;other biological processes |



|        |                                                                      |        |   |     |   |    |        |                                      |
|--------|----------------------------------------------------------------------|--------|---|-----|---|----|--------|--------------------------------------|
| O75436 | Vacuolar protein sorting-associated protein 26A<br>[OS=Homo sapiens] | VPS26A | 2 | 30  | 2 | 9  | 7.773  | transport;other biological processes |
| P31946 | 14-3-3 protein beta/alpha<br>[OS=Homo sapiens]                       | YWHAB  | 8 | 364 | 5 | 30 | 46.815 | transport;other biological processes |

**Table S9.** List of 164 proteins modified by CIHDyA and HDyA in both HLMVEC and EA.hy926 cells

| Accession | Description                                                                             | Gene Symbol | # Peptides | # PSMs | # Unique Peptides | Coverage [%] | Sum PEP Score | Biological Process                                                                                                                         |
|-----------|-----------------------------------------------------------------------------------------|-------------|------------|--------|-------------------|--------------|---------------|--------------------------------------------------------------------------------------------------------------------------------------------|
| P09110-1  | 3-ketoacyl-CoA thiolase, peroxisomal [OS=Homo sapiens]                                  | ACAA1       | 10         | 131    | 10                | 38           | 60.632        | metabolic process;transport                                                                                                                |
| Q99798    | Aconitate hydratase, mitochondrial [OS=Homo sapiens]                                    | ACO2        | 5          | 18     | 5                 | 10           | 17.453        | metabolic process;response to stimulus                                                                                                     |
| O00154-4  | Isoform 4 of Cytosolic acyl coenzyme A thioester hydrolase [OS=Homo sapiens]            | ACOT7       | 7          | 102    | 7                 | 29           | 32.112        | metabolic process                                                                                                                          |
| O95573    | long-chain-fatty-acid--CoA ligase 3 [OS=Homo sapiens]                                   | ACSL3       | 5          | 46     | 3                 | 10           | 21.683        | cell organization and biogenesis;metabolic process;regulation of biological process;response to stimulus;transport                         |
| P12814-1  | Alpha-actinin-1 [OS=Homo sapiens]                                                       | ACTN1       | 30         | 600    | 18                | 42           | 171.711       | cell differentiation;cell organization and biogenesis;regulation of biological process;transport                                           |
| P61160-1  | Actin-related protein 2 [OS=Homo sapiens]                                               | ACTR2       | 7          | 79     | 7                 | 22           | 39.621        | cell division;cell organization and biogenesis;cellular component movement;regulation of biological process;response to stimulus;transport |
| P30520    | adenylosuccinate synthetase isozyme 2 [OS=Homo sapiens]                                 | ADSS        | 4          | 54     | 4                 | 13           | 26.475        | metabolic process;response to stimulus                                                                                                     |
| O00116    | Alkylidihydroxyacetonephosphate synthase, peroxisomal [OS=Homo sapiens]                 | AGPS        | 3          | 47     | 3                 | 6            | 16.795        | metabolic process                                                                                                                          |
| Q13155    | aminoacyl tRNA synthase complex-interacting multifunctional protein 2 [OS=Homo sapiens] | AIMP2       | 3          | 21     | 3                 | 17           | 12.218        | cell death;cell differentiation;cell organization and biogenesis;development;metabolic process;regulation of biological process            |
| P15121    | aldose reductase [OS=Homo sapiens]                                                      | AKR1B1      | 5          | 92     | 4                 | 11           | 25.171        | metabolic process;regulation of biological process;response to stimulus                                                                    |
| P49419    | Alpha-aminoadipic semialdehyde dehydrogenase [OS=Homo sapiens]                          | ALDH7 A1    | 5          | 25     | 5                 | 15           | 17.78         | metabolic process                                                                                                                          |
| P20073-1  | Annexin A7 [OS=Homo sapiens]                                                            | ANXA7       | 4          | 48     | 4                 | 10           | 20.365        | cell differentiation;cell organization and biogenesis;cell                                                                                 |

|          |                                                               |                 |   |     |   |    |        |                                                                                                                                                           |
|----------|---------------------------------------------------------------|-----------------|---|-----|---|----|--------|-----------------------------------------------------------------------------------------------------------------------------------------------------------|
|          |                                                               |                 |   |     |   |    |        | proliferation;cellular homeostasis;metabolic process;regulation of biological process;response to stimulus                                                |
| Q9BXS5-1 | AP-1 complex subunit mu-1 [OS=Homo sapiens]                   | AP1M1           | 5 | 20  | 5 | 17 | 15.492 | cell organization and biogenesis;regulation of biological process;transport                                                                               |
| O00203-1 | AP-3 complex subunit beta-1 [OS=Homo sapiens]                 | AP3B1           | 2 | 22  | 2 | 3  | 7.489  | cell organization and biogenesis;cellular component movement;coagulation;regulation of biological process;transport                                       |
| P48444   | Coatomer subunit delta [OS=Homo sapiens]                      | ARCN1           | 6 | 125 | 6 | 11 | 32.866 | response to stimulus;transport                                                                                                                            |
| P61204   | ADP-ribosylation factor 3 [OS=Homo sapiens]                   | ARF3            | 7 | 86  | 4 | 51 | 42.394 | metabolic process;regulation of biological process;response to stimulus;transport                                                                         |
| P40616   | ADP-ribosylation factor-like protein 1 [OS=Homo sapiens]      | ARL1            | 3 | 46  | 3 | 19 | 16.567 | cell organization and biogenesis;metabolic process;regulation of biological process;response to stimulus;transport                                        |
| O15144   | Actin-related protein 2/3 complex subunit 2 [OS=Homo sapiens] | ARPC2           | 4 | 41  | 4 | 12 | 14.602 | cell organization and biogenesis;cellular component movement;regulation of biological process;response to stimulus                                        |
| O43684   | Mitotic checkpoint protein BUB3 [OS=Homo sapiens]             | BUB3            | 4 | 39  | 4 | 13 | 17.118 | cell division;cell organization and biogenesis;metabolic process;regulation of biological process                                                         |
| Q9Y3I0   | tRNA-splicing ligase RtcB homolog [OS=Homo sapiens]           | C22orf2 8; RTCB | 7 | 78  | 7 | 16 | 39.425 | metabolic process                                                                                                                                         |
| P07384   | Calpain-1 catalytic subunit [OS=Homo sapiens]                 | CAPN1           | 4 | 51  | 4 | 7  | 22.1   | cell death;cell organization and biogenesis;metabolic process;regulation of biological process;transport                                                  |
| P52907   | F-actin-capping protein subunit alpha-1 [OS=Homo sapiens]     | CAPZA 1         | 3 | 46  | 2 | 14 | 13.776 | cell organization and biogenesis;cellular component movement;coagulation;defense response;regulation of biological process;response to stimulus;transport |

|          |                                                            |                              |   |     |   |    |        |                                                                                                                                                                                                                                                |
|----------|------------------------------------------------------------|------------------------------|---|-----|---|----|--------|------------------------------------------------------------------------------------------------------------------------------------------------------------------------------------------------------------------------------------------------|
| P04040   | catalase [OS=Homo sapiens]                                 | CAT                          | 3 | 22  | 3 | 9  | 16.407 | cell differentiation;cell organization and biogenesis;metabolic process;regulation of biological process;response to stimulus;transport                                                                                                        |
| Q03135   | Caveolin-1 [OS=Homo sapiens]                               | CAV1                         | 3 | 157 | 3 | 25 | 22.318 | cell communication;cell differentiation;cell organization and biogenesis;cellular component movement;cellular homeostasis;metabolic process;regulation of biological process;response to stimulus;transport                                    |
| Q16543   | Hsp90 co-chaperone Cdc37 [OS=Homo sapiens]                 | CDC37                        | 4 | 42  | 4 | 14 | 19.443 | cell division;metabolic process;regulation of biological process;response to stimulus;transport                                                                                                                                                |
| Q00535   | Cyclin-dependent-like kinase 5 [OS=Homo sapiens]           | CDK5                         | 3 | 18  | 3 | 9  | 12.872 | cell communication;cell death;cell differentiation;cell division;cell growth;cell organization and biogenesis;cell proliferation;cellular component movement;metabolic process;regulation of biological process;response to stimulus;transport |
| Q9Y696   | Chloride intracellular channel protein 4 [OS=Homo sapiens] | CLIC4                        | 8 | 46  | 8 | 43 | 27.706 | cell differentiation;cell organization and biogenesis;cellular homeostasis;metabolic process;regulation of biological process;response to stimulus;transport                                                                                   |
| Q96KP4   | cytosolic non-specific dipeptidase [OS=Homo sapiens]       | CNDP2                        | 3 | 15  | 3 | 10 | 8.701  | metabolic process                                                                                                                                                                                                                              |
| Q8NBJS   | Procollagen galactosyltransferase 1 [OS=Homo sapiens]      | COLGA<br>LT1;<br>GLT25D<br>1 | 5 | 38  | 5 | 9  | 21.911 |                                                                                                                                                                                                                                                |
| P21964-1 | Catechol O-methyltransferase [OS=Homo sapiens]             | COMT                         | 4 | 35  | 4 | 20 | 22.626 | cell communication;metabolic process;regulation of biological process;response to stimulus                                                                                                                                                     |
| Q99829   | Copine-1 [OS=Homo sapiens]                                 | CPNE1                        | 4 | 42  | 4 | 7  | 17.563 | cell differentiation;cell growth;metabolic process;regulation                                                                                                                                                                                  |

|          |                                                                                                                                                |        |   |    |   |    |        |                                                                                                                                                |
|----------|------------------------------------------------------------------------------------------------------------------------------------------------|--------|---|----|---|----|--------|------------------------------------------------------------------------------------------------------------------------------------------------|
|          |                                                                                                                                                |        |   |    |   |    |        | of biological process;response to stimulus;transport                                                                                           |
| P41240   | tyrosine-protein kinase CSK<br>[OS=Homo sapiens]                                                                                               | CSK    | 3 | 14 | 3 | 8  | 9.862  | cell differentiation;cell organization and biogenesis;defense response;metabolic process;regulation of biological process;response to stimulus |
| P56545   | c-terminal-binding protein 2<br>[OS=Homo sapiens]                                                                                              | CTBP2  | 2 | 25 | 1 | 6  | 9.605  | cell differentiation;metabolic process;regulation of biological process                                                                        |
| O43169   | Cytochrome b5 type B<br>[OS=Homo sapiens]                                                                                                      | CYB5B  | 3 | 49 | 3 | 45 | 24.678 | metabolic process;transport                                                                                                                    |
| P61803   | Dolichyl-<br>diphosphooligosaccharide--<br>protein glycosyltransferase<br>subunit DAD1 [OS=Homo sapiens]                                       | DAD1   | 3 | 43 | 3 | 29 | 15.652 | cell death;metabolic process;regulation of biological process;response to stimulus                                                             |
| Q6PI48   | Aspartate--tRNA ligase,<br>mitochondrial [OS=Homo sapiens]                                                                                     | DARS2  | 3 | 37 | 3 | 6  | 13.475 | metabolic process                                                                                                                              |
| Q92499   | ATP-dependent RNA helicase<br>DDX1 [OS=Homo sapiens]                                                                                           | DDX1   | 7 | 92 | 7 | 10 | 34.476 | cell organization and biogenesis;development;metabolic process;regulation of biological process;response to stimulus                           |
| Q9NR30-1 | Nucleolar RNA helicase 2<br>[OS=Homo sapiens]                                                                                                  | DDX21  | 6 | 42 | 6 | 9  | 21.475 | cell differentiation;metabolic process;regulation of biological process;response to stimulus                                                   |
| P26196   | Probable ATP-dependent RNA<br>helicase DDX6 [OS=Homo sapiens]                                                                                  | DDX6   | 7 | 72 | 7 | 20 | 32.456 | cell organization and biogenesis;metabolic process;regulation of biological process                                                            |
| P09622   | Dihydrolipoyl dehydrogenase,<br>mitochondrial [OS=Homo sapiens]                                                                                | DLD    | 4 | 42 | 4 | 13 | 15.742 | cellular homeostasis;metabolic process;regulation of biological process                                                                        |
| P36957   | Dihydrolipoyllysine-residue<br>succinyltransferase component<br>of 2-oxoglutarate dehydrogenase<br>complex, mitochondrial<br>[OS=Homo sapiens] | DLST   | 3 | 56 | 3 | 8  | 22.62  | metabolic process                                                                                                                              |
| Q9UDY4   | DnaJ homolog subfamily B<br>member 4 [OS=Homo sapiens]                                                                                         | DNAJB4 | 4 | 44 | 3 | 17 | 14.628 | metabolic process;regulation of biological process;response to stimulus                                                                        |

|          |                                                                                    |         |    |     |    |    |        |                                                                                                                                                                                                                      |
|----------|------------------------------------------------------------------------------------|---------|----|-----|----|----|--------|----------------------------------------------------------------------------------------------------------------------------------------------------------------------------------------------------------------------|
| O00429   | Dynamin-1-like protein<br>[OS=Homo sapiens]                                        | DNM1L   | 9  | 68  | 9  | 16 | 31.972 | cell death;cell organization and biogenesis;regulation of biological process;response to stimulus;transport                                                                                                          |
| Q12805   | EGF-containing fibulin-like extracellular matrix protein 1<br>[OS=Homo sapiens]    | EFEMP1  | 7  | 74  | 7  | 17 | 26.956 | metabolic process;regulation of biological process;response to stimulus                                                                                                                                              |
| Q15029   | 116 kDa U5 small nuclear ribonucleoprotein component<br>[OS=Homo sapiens]          | EFTUD2  | 2  | 55  | 1  | 2  | 9.595  | cell organization and biogenesis;metabolic process;response to stimulus                                                                                                                                              |
| Q9H4M9   | EH domain-containing protein 1<br>[OS=Homo sapiens]                                | EHD1    | 14 | 212 | 13 | 41 | 81.472 | cell organization and biogenesis;coagulation;regulation of biological process;response to stimulus;transport                                                                                                         |
| Q9H223   | EH domain-containing protein 4<br>[OS=Homo sapiens]                                | EHD4    | 7  | 99  | 7  | 16 | 33.887 | cell organization and biogenesis;regulation of biological process;response to stimulus;transport                                                                                                                     |
| P19525   | interferon-induced, double-stranded RNA-activated protein kinase [OS=Homo sapiens] | EIF2AK2 | 2  | 17  | 2  | 4  | 6.913  | cell communication;defense response;metabolic process;regulation of biological process;response to stimulus                                                                                                          |
| P41091   | eukaryotic translation initiation factor 2 subunit 3 [OS=Homo sapiens]             | EIF2S3  | 8  | 94  | 8  | 26 | 39.684 | metabolic process;transport                                                                                                                                                                                          |
| Q14240-1 | eukaryotic initiation factor 4A-II<br>[OS=Homo sapiens]                            | EIF4A2  | 10 | 354 | 2  | 27 | 79.092 | metabolic process;regulation of biological process                                                                                                                                                                   |
| Q04637   | eukaryotic translation initiation factor 4 gamma 1 [OS=Homo sapiens]               | EIF4G1  | 3  | 16  | 3  | 2  | 13.446 | cell organization and biogenesis;defense response;metabolic process;regulation of biological process;response to stimulus                                                                                            |
| Q6IS14   | Eukaryotic translation initiation factor 5A-1-like [OS=Homo sapiens]               | EIF5AL1 | 3  | 13  | 3  | 33 | 8.843  | metabolic process;regulation of biological process;transport                                                                                                                                                         |
| P29317   | Ephrin type-A receptor 2<br>[OS=Homo sapiens]                                      | EPHA2   | 4  | 27  | 4  | 4  | 15.174 | cell death;cell differentiation;cell organization and biogenesis;cell proliferation;cellular component movement;defense response;development;metabolic process;regulation of biological process;response to stimulus |

|          |                                                                                    |          |    |     |    |    |        |                                                                                                                 |
|----------|------------------------------------------------------------------------------------|----------|----|-----|----|----|--------|-----------------------------------------------------------------------------------------------------------------|
| P07814   | Bifunctional glutamate/proline--tRNA ligase [OS=Homo sapiens]                      | EPRS     | 14 | 113 | 14 | 13 | 51.704 | cell organization and biogenesis;metabolic process;regulation of biological process;response to stimulus        |
| Q9NZ08-1 | endoplasmic reticulum aminopeptidase 1 [OS=Homo sapiens]                           | ERAP1    | 7  | 46  | 7  | 8  | 22.243 | cell communication;cell differentiation;metabolic process;regulation of biological process;response to stimulus |
| A0FGR8-1 | Extended synaptotagmin-2 [OS=Homo sapiens]                                         | ESYT2    | 7  | 48  | 7  | 10 | 28.763 | metabolic process;transport                                                                                     |
| P62495   | Eukaryotic peptide chain release factor subunit 1 [OS=Homo sapiens]                | ETF1     | 5  | 60  | 5  | 14 | 25.537 | cell organization and biogenesis;metabolic process;regulation of biological process                             |
| Q9NZB2-1 | Constitutive coactivator of PPAR-gamma-like protein 1 [OS=Homo sapiens]            | FAM120 A | 6  | 38  | 6  | 8  | 16.621 |                                                                                                                 |
| Q96TA1   | Niban-like protein 1 [OS=Homo sapiens]                                             | FAM129 B | 8  | 106 | 8  | 12 | 36.864 | cell differentiation;cellular component movement;metabolic process;regulation of biological process;transport   |
| Q9BRX8-1 | Redox-regulatory protein FAM213A [OS=Homo sapiens]                                 | FAM213 A | 8  | 170 | 8  | 34 | 41.341 | metabolic process;regulation of biological process                                                              |
| Q9NSD9   | Phenylalanine--tRNA ligase beta subunit [OS=Homo sapiens]                          | FARSB    | 5  | 60  | 5  | 9  | 19.341 | cell organization and biogenesis;metabolic process                                                              |
| P14324   | Farnesyl pyrophosphate synthase [OS=Homo sapiens]                                  | FDPS     | 2  | 40  | 2  | 7  | 9.005  | metabolic process;regulation of biological process                                                              |
| Q13045-1 | protein flightless-1 homolog [OS=Homo sapiens]                                     | FLII     | 3  | 50  | 3  | 2  | 15.731 | cell organization and biogenesis;development;metabolic process;regulation of biological process                 |
| P51570   | galactokinase [OS=Homo sapiens]                                                    | GALK1    | 3  | 29  | 3  | 11 | 11.034 | metabolic process                                                                                               |
| Q14697-1 | Neutral alpha-glucosidase AB [OS=Homo sapiens]                                     | GANAB    | 13 | 384 | 13 | 15 | 90.669 | metabolic process                                                                                               |
| P62879   | Guanine nucleotide-binding protein G(I)/G(S)/G(T) subunit beta-2 [OS=Homo sapiens] | GNB2     | 3  | 42  | 3  | 10 | 21.707 | metabolic process;regulation of biological process;response to stimulus                                         |
| P40939   | Trifunctional enzyme subunit alpha, mitochondrial [OS=Homo sapiens]                | HADHA    | 11 | 180 | 11 | 20 | 71.612 | metabolic process;response to stimulus                                                                          |
| Q00341-1 | Vigilin [OS=Homo sapiens]                                                          | HDLBP    | 11 | 127 | 11 | 12 | 47.817 | metabolic process;transport                                                                                     |

|          |                                                                            |          |    |     |    |    |         |                                                                                                                                                                |
|----------|----------------------------------------------------------------------------|----------|----|-----|----|----|---------|----------------------------------------------------------------------------------------------------------------------------------------------------------------|
| Q8TCT9-1 | Minor histocompatibility antigen H13 [OS=Homo sapiens]                     | HM13     | 3  | 26  | 3  | 12 | 16.831  | cell organization and biogenesis;metabolic process                                                                                                             |
| P31943   | Heterogeneous nuclear ribonucleoprotein H [OS=Homo sapiens]                | HNRNP H1 | 12 | 402 | 4  | 34 | 103.361 | metabolic process;regulation of biological process;response to stimulus                                                                                        |
| P14866   | Heterogeneous nuclear ribonucleoprotein L [OS=Homo sapiens]                | HNRNP L  | 7  | 43  | 7  | 19 | 21.286  | metabolic process;regulation of biological process                                                                                                             |
| O43390-1 | heterogeneous nuclear ribonucleoprotein r [OS=Homo sapiens]                | HNRNP R  | 5  | 67  | 2  | 9  | 20.585  | metabolic process;regulation of biological process                                                                                                             |
| Q9NSE4   | Isoleucine--tRNA ligase, mitochondrial [OS=Homo sapiens]                   | IARS2    | 5  | 49  | 5  | 6  | 23.511  | metabolic process;regulation of biological process                                                                                                             |
| Q16666-1 | gamma-interferon-inducible protein 16 [OS=Homo sapiens]                    | IFI16    | 5  | 56  | 5  | 8  | 23.879  | cell communication;cell death;cell differentiation;cell proliferation;defense response;metabolic process;regulation of biological process;response to stimulus |
| Q9NZI8   | Insulin-like growth factor 2 mRNA-binding protein 1 [OS=Homo sapiens]      | IGF2BP 1 | 6  | 121 | 5  | 14 | 34.943  | cell proliferation;regulation of biological process;transport                                                                                                  |
| Q9Y6M1   | Insulin-like growth factor 2 mRNA-binding protein 2 [OS=Homo sapiens]      | IGF2BP 2 | 8  | 102 | 6  | 18 | 40.57   | regulation of biological process;transport                                                                                                                     |
| Q8TEX9-1 | Importin-4 [OS=Homo sapiens]                                               | IPO4     | 5  | 28  | 5  | 5  | 21.79   | cell organization and biogenesis;transport                                                                                                                     |
| O95373   | Importin-7 [OS=Homo sapiens]                                               | IPO7     | 7  | 51  | 6  | 9  | 30.846  | defense response;regulation of biological process;response to stimulus;transport                                                                               |
| Q96P70   | Importin-9 [OS=Homo sapiens]                                               | IPO9     | 2  | 23  | 2  | 4  | 19.99   | transport                                                                                                                                                      |
| Q14974   | Importin subunit beta-1 [OS=Homo sapiens]                                  | KPNB1    | 6  | 66  | 6  | 9  | 27.52   | cell organization and biogenesis;cellular component movement;metabolic process;regulation of biological process;response to stimulus;transport                 |
| P42704   | Leucine-rich PPR motif-containing protein, mitochondrial [OS=Homo sapiens] | LRPPR C  | 12 | 107 | 12 | 12 | 54.149  | cellular component movement;metabolic process;regulation of biological process;transport                                                                       |



|          |                                                                                 |       |    |     |   |    |        |                                                                                                                     |
|----------|---------------------------------------------------------------------------------|-------|----|-----|---|----|--------|---------------------------------------------------------------------------------------------------------------------|
| P09960-1 | leukotriene A-4 hydrolase<br>[OS=Homo sapiens]                                  | LTA4H | 6  | 68  | 6 | 12 | 44.086 | metabolic process;transport                                                                                         |
| Q9UPN3   | Microtubule-actin cross-linking factor 1, isoforms 1/2/3/5<br>[OS=Homo sapiens] | MACF1 | 15 | 128 | 4 | 2  | 52.118 | cell organization and biogenesis;regulation of biological process;response to stimulus;transport                    |
| P46821   | microtubule-associated protein 1B [OS=Homo sapiens]                             | MAP1B | 2  | 32  | 2 | 2  | 11.527 | cell growth;cell organization and biogenesis;cellular component movement;regulation of biological process;transport |
| P25205   | DNA replication licensing factor mcm3 [OS=Homo sapiens]                         | MCM3  | 9  | 84  | 9 | 14 | 41.663 | metabolic process                                                                                                   |
| P33993-1 | DNA replication licensing factor MCM7 [OS=Homo sapiens]                         | MCM7  | 7  | 47  | 7 | 13 | 22.492 | cell proliferation;metabolic process;regulation of biological process;response to stimulus                          |
| O60502   | protein O-GlcNAcase [OS=Homo sapiens]                                           | MGEA5 | 3  | 10  | 3 | 4  | 11.843 | metabolic process                                                                                                   |
| Q96S97   | myeloid-associated differentiation marker [OS=Homo sapiens]                     | MYADM | 2  | 48  | 2 | 10 | 12.224 | cell organization and biogenesis;regulation of biological process                                                   |
| O43776   | Asparagine--tRNA ligase, cytoplasmic [OS=Homo sapiens]                          | NARS  | 5  | 37  | 5 | 9  | 22.133 | metabolic process                                                                                                   |
| Q8TD19   | Serine/threonine-protein kinase Nek9 [OS=Homo sapiens]                          | NEK9  | 2  | 20  | 2 | 2  | 10.033 | cell division;cell organization and biogenesis;metabolic process                                                    |
| O00567   | Nucleolar protein 56 [OS=Homo sapiens]                                          | NOP56 | 6  | 49  | 6 | 16 | 24.337 | metabolic process                                                                                                   |
| P15559-1 | NAD(P)H dehydrogenase [quinone] 1 [OS=Homo sapiens]                             | NQO1  | 3  | 67  | 3 | 15 | 19.779 | cell communication;metabolic process;regulation of biological process;response to stimulus                          |
| Q9BSD7   | Cancer-related nucleoside-triphosphatase [OS=Homo sapiens]                      | NTPCR | 2  | 25  | 2 | 14 | 12.919 | metabolic process;response to stimulus                                                                              |
| P04181-1 | Ornithine aminotransferase, mitochondrial [OS=Homo sapiens]                     | OAT   | 5  | 48  | 5 | 14 | 21.912 | cell organization and biogenesis;metabolic process                                                                  |
| Q9UQ80   | proliferation-associated protein 2G4 [OS=Homo sapiens]                          | PA2G4 | 6  | 45  | 6 | 18 | 18.858 | cell proliferation;metabolic process;regulation of biological process;transport                                     |
| Q99497   | protein/nucleic acid deglycase DJ-1 [OS=Homo sapiens]                           | PARK7 | 6  | 49  | 6 | 46 | 21.783 | cell communication;cell organization and biogenesis;defense response;metabolic process;regulation of biological     |

|          |                                                                                                     |          |    |     |    |    |         |                                                                                                                                             |
|----------|-----------------------------------------------------------------------------------------------------|----------|----|-----|----|----|---------|---------------------------------------------------------------------------------------------------------------------------------------------|
|          |                                                                                                     |          |    |     |    |    |         | process;response to stimulus;transport                                                                                                      |
| P16284   | Platelet endothelial cell adhesion molecule [OS=Homo sapiens]                                       | PECAM 1  | 7  | 77  | 7  | 14 | 34.047  | cell organization and biogenesis;cellular component movement;regulation of biological process;response to stimulus;transport                |
| Q01813   | ATP-dependent 6-phosphofructokinase, platelet type [OS=Homo sapiens]                                | PFKP     | 19 | 321 | 17 | 29 | 119.994 | metabolic process                                                                                                                           |
| P35080-2 | Isoform IIb of Profilin-2 [OS=Homo sapiens]                                                         | PFN2     | 3  | 50  | 3  | 26 | 19.509  | cell organization and biogenesis;regulation of biological process                                                                           |
| O95336   | 6-phosphogluconolactonase [OS=Homo sapiens]                                                         | PGLS     | 6  | 68  | 6  | 34 | 25.338  | metabolic process                                                                                                                           |
| Q96G03   | Phosphoglucomutase-2 [OS=Homo sapiens]                                                              | PGM2     | 3  | 36  | 2  | 7  | 14.683  | metabolic process;transport                                                                                                                 |
| Q6PCE3   | glucose 1,6-bisphosphate synthase [OS=Homo sapiens]                                                 | PGM2L 1  | 6  | 51  | 6  | 10 | 18.964  | metabolic process                                                                                                                           |
| O60664-1 | Perilipin-3 [OS=Homo sapiens]                                                                       | PLIN3    | 5  | 31  | 5  | 18 | 26.583  | transport                                                                                                                                   |
| Q02809   | Procollagen-lysine,2-oxoglutarate 5-dioxygenase 1 [OS=Homo sapiens]                                 | PLOD1    | 2  | 10  | 2  | 4  | 9.28    | metabolic process;response to stimulus                                                                                                      |
| P36873-1 | serine/threonine-protein phosphatase PP1-gamma catalytic subunit [OS=Homo sapiens]                  | PPP1C C  | 4  | 35  | 2  | 18 | 20.548  | cell differentiation;cell division;cell organization and biogenesis;metabolic process;regulation of biological process;response to stimulus |
| P62714   | serine/threonine-protein phosphatase 2A catalytic subunit beta isoform [OS=Homo sapiens]            | PPP2C B  | 4  | 36  | 4  | 18 | 19.018  | cell organization and biogenesis;metabolic process;regulation of biological process;response to stimulus                                    |
| P30153   | serine/threonine-protein phosphatase 2A 65 kDa regulatory subunit A alpha isoform [OS=Homo sapiens] | PPP2R1 A | 9  | 87  | 9  | 20 | 50.644  | cell death;cell organization and biogenesis;metabolic process;regulation of biological process;response to stimulus                         |
| Q6P2Q9   | Pre-mRNA-processing-splicing factor 8 [OS=Homo sapiens]                                             | PRPF8    | 9  | 88  | 9  | 4  | 39.331  | cell organization and biogenesis;metabolic process;response to stimulus                                                                     |
| P25789   | Proteasome subunit alpha type-4 [OS=Homo sapiens]                                                   | PSMA4    | 4  | 44  | 4  | 18 | 16.736  | metabolic process;regulation of biological process;response to stimulus;transport                                                           |

|          |                                                                   |            |    |     |    |    |        |                                                                                                                                         |
|----------|-------------------------------------------------------------------|------------|----|-----|----|----|--------|-----------------------------------------------------------------------------------------------------------------------------------------|
| Q14818-1 | Proteasome subunit alpha type-7 [OS=Homo sapiens]                 | PSMA7      | 3  | 58  | 3  | 14 | 17.679 | metabolic process;regulation of biological process;response to stimulus;transport                                                       |
| P17980   | 26S proteasome regulatory subunit 6A [OS=Homo sapiens]            | PSMC3      | 10 | 102 | 10 | 28 | 41.944 | metabolic process;regulation of biological process;response to stimulus;transport                                                       |
| O00231   | 26S proteasome non-ATPase regulatory subunit 11 [OS=Homo sapiens] | PSMD1<br>1 | 5  | 33  | 5  | 15 | 19.531 | cell differentiation;cell organization and biogenesis;metabolic process;regulation of biological process;response to stimulus;transport |
| Q9UNM6   | 26S proteasome non-ATPase regulatory subunit 13 [OS=Homo sapiens] | PSMD1<br>3 | 4  | 34  | 4  | 9  | 11.47  | cell organization and biogenesis;metabolic process;regulation of biological process;response to stimulus;transport                      |
| Q13200   | 26S proteasome non-ATPase regulatory subunit 2 [OS=Homo sapiens]  | PSMD2      | 8  | 67  | 8  | 10 | 39.613 | metabolic process;regulation of biological process;response to stimulus;transport                                                       |
| O43242   | 26S proteasome non-ATPase regulatory subunit 3 [OS=Homo sapiens]  | PSMD3      | 7  | 70  | 7  | 16 | 27.884 | metabolic process;regulation of biological process;response to stimulus;transport                                                       |
| P55036-1 | 26S proteasome non-ATPase regulatory subunit 4 [OS=Homo sapiens]  | PSMD4      | 3  | 22  | 3  | 13 | 8.88   | cell organization and biogenesis;metabolic process;regulation of biological process;response to stimulus;transport                      |
| Q16401   | 26S proteasome non-ATPase regulatory subunit 5 [OS=Homo sapiens]  | PSMD5      | 2  | 15  | 2  | 5  | 6.049  | cell organization and biogenesis;metabolic process;regulation of biological process;response to stimulus;transport                      |
| Q92530   | proteasome inhibitor PI31 subunit [OS=Homo sapiens]               | PSMF1      | 3  | 12  | 3  | 15 | 9.965  | metabolic process;regulation of biological process;response to stimulus;transport                                                       |
| P47897   | glutamine--tRNA ligase [OS=Homo sapiens]                          | QARS       | 7  | 60  | 7  | 12 | 25.47  | metabolic process;regulation of biological process                                                                                      |
| P61026   | ras-related protein rab-10 [OS=Homo sapiens]                      | RAB10      | 3  | 72  | 1  | 17 | 19.93  | cell differentiation;cell organization and biogenesis;regulation of biological process;response to stimulus;transport                   |

|          |                                                                                  |          |   |     |   |    |        |                                                                                                                                         |
|----------|----------------------------------------------------------------------------------|----------|---|-----|---|----|--------|-----------------------------------------------------------------------------------------------------------------------------------------|
| P51149   | ras-related protein Rab-7a<br>[OS=Homo sapiens]                                  | RAB7A    | 4 | 81  | 4 | 22 | 28.085 | cell organization and biogenesis;cellular homeostasis;metabolic process;regulation of biological process;response to stimulus;transport |
| Q9UKM9-1 | RNA-binding protein Raly<br>[OS=Homo sapiens]                                    | RALY     | 3 | 46  | 3 | 9  | 12.838 | metabolic process;regulation of biological process                                                                                      |
| P46060   | Ran GTPase-activating protein 1<br>[OS=Homo sapiens]                             | RANGA P1 | 2 | 29  | 2 | 4  | 10.147 | cell organization and biogenesis;metabolic process;regulation of biological process;response to stimulus                                |
| P61224-1 | Ras-related protein Rap-1b<br>[OS=Homo sapiens]                                  | RAP1B    | 4 | 68  | 3 | 19 | 21.985 | cell organization and biogenesis;cell proliferation;regulation of biological process;response to stimulus;transport                     |
| P61225   | ras-related protein Rap-2b<br>[OS=Homo sapiens]                                  | RAP2B    | 2 | 41  | 2 | 13 | 10.78  | cell organization and biogenesis;regulation of biological process;response to stimulus;transport                                        |
| P46779   | 60S ribosomal protein L28<br>[OS=Homo sapiens]                                   | RPL28    | 3 | 37  | 3 | 27 | 11.605 | cell organization and biogenesis;metabolic process;regulation of biological process;transport                                           |
| P39023   | 60S ribosomal protein L3<br>[OS=Homo sapiens]                                    | RPL3     | 6 | 105 | 6 | 18 | 36.542 | cell organization and biogenesis;metabolic process;response to stimulus;transport                                                       |
| P49207   | 60S ribosomal protein L34<br>[OS=Homo sapiens]                                   | RPL34    | 2 | 59  | 2 | 13 | 10.187 | cell organization and biogenesis;metabolic process;transport                                                                            |
| P46777   | 60S ribosomal protein L5<br>[OS=Homo sapiens]                                    | RPL5     | 7 | 150 | 7 | 29 | 44.343 | cell organization and biogenesis;metabolic process;regulation of biological process;transport                                           |
| P62917   | 60S ribosomal protein L8<br>[OS=Homo sapiens]                                    | RPL8     | 5 | 71  | 5 | 22 | 25.443 | cell organization and biogenesis;metabolic process;response to stimulus;transport                                                       |
| Q9NQG5   | regulation of nuclear pre-mRNA domain-containing protein 1B<br>[OS=Homo sapiens] | RPRD1 B  | 3 | 36  | 3 | 14 | 13.411 | metabolic process;regulation of biological process                                                                                      |

|          |                                                                                 |                  |   |     |   |    |        |                                                                                                                                    |
|----------|---------------------------------------------------------------------------------|------------------|---|-----|---|----|--------|------------------------------------------------------------------------------------------------------------------------------------|
| P08708   | 40S ribosomal protein S17<br>[OS=Homo sapiens]                                  | RPS17;<br>RPS17L | 3 | 27  | 3 | 40 | 10.947 | cell organization and<br>biogenesis;metabolic<br>process;transport                                                                 |
| P62847-1 | 40S ribosomal protein S24<br>[OS=Homo sapiens]                                  | RPS24            | 4 | 63  | 4 | 35 | 22.684 | cell organization and<br>biogenesis;metabolic<br>process;transport                                                                 |
| O76021   | Ribosomal L1 domain-containing<br>protein 1 [OS=Homo sapiens]                   | RSL1D1           | 4 | 28  | 4 | 11 | 13.41  | cell differentiation;metabolic<br>process;regulation of biological<br>process                                                      |
| O75396   | Vesicle-trafficking protein<br>SEC22b [OS=Homo sapiens]                         | SEC22B           | 3 | 38  | 3 | 21 | 17.174 | cell organization and<br>biogenesis;regulation of biological<br>process;transport                                                  |
| Q15436   | protein transport protein Sec23A<br>[OS=Homo sapiens]                           | SEC23A           | 9 | 109 | 9 | 16 | 46.715 | cell organization and<br>biogenesis;transport                                                                                      |
| P61619   | Protein transport protein Sec61<br>subunit alpha isoform 1<br>[OS=Homo sapiens] | SEC61A<br>1      | 3 | 39  | 3 | 5  | 14.945 | cell growth;cell organization and<br>biogenesis;response to<br>stimulus;transport                                                  |
| Q15019   | septin-2 [OS=Homo sapiens]                                                      | SEPT2            | 6 | 128 | 5 | 22 | 37.314 | cell differentiation;cell division;cell<br>organization and<br>biogenesis;regulation of biological<br>process;response to stimulus |
| Q9UHD8-1 | Septin-9 [OS=Homo sapiens]                                                      | SEPT9            | 5 | 55  | 4 | 9  | 24.754 | cell division;cell organization and<br>biogenesis;regulation of biological<br>process                                              |
| Q15393-1 | Splicing factor 3B subunit 3<br>[OS=Homo sapiens]                               | SF3B3            | 2 | 27  | 2 | 2  | 10.51  | cell organization and<br>biogenesis;metabolic<br>process;regulation of biological<br>process                                       |
| Q9BWM7   | Sideroflexin-3 [OS=Homo<br>sapiens]                                             | SFXN3            | 4 | 71  | 4 | 18 | 20.592 | transport                                                                                                                          |
| Q6NUK1   | Calcium-binding mitochondrial<br>carrier protein SCaMC-1<br>[OS=Homo sapiens]   | SLC25A<br>24     | 4 | 32  | 4 | 9  | 16.206 | regulation of biological<br>process;response to<br>stimulus;transport                                                              |
| P12236   | ADP/ATP translocase 3<br>[OS=Homo sapiens]                                      | SLC25A<br>6      | 9 | 321 | 2 | 35 | 53.298 | cell death;cell organization and<br>biogenesis;regulation of biological<br>process;response to<br>stimulus;transport               |
| Q13596   | Sorting nexin-1 [OS=Homo<br>sapiens]                                            | SNX1             | 2 | 26  | 1 | 3  | 10.142 | cell organization and<br>biogenesis;metabolic<br>process;regulation of biological<br>process;transport                             |

|          |                                                                                        |         |   |     |   |    |        |                                                                                                                                                |
|----------|----------------------------------------------------------------------------------------|---------|---|-----|---|----|--------|------------------------------------------------------------------------------------------------------------------------------------------------|
| Q9UNH7-1 | Sorting nexin-6 [OS=Homo sapiens]                                                      | SNX6    | 3 | 17  | 3 | 9  | 11.681 | cell organization and biogenesis;regulation of biological process;transport                                                                    |
| Q13813   | Spectrin alpha chain, non-erythrocytic 1 [OS=Homo sapiens]                             | SPTAN1  | 7 | 44  | 7 | 4  | 32.09  | cell organization and biogenesis;cellular component movement;metabolic process;regulation of biological process;response to stimulus;transport |
| Q9UHB9   | Signal recognition particle subunit SRP68 [OS=Homo sapiens]                            | SRP68   | 3 | 63  | 3 | 6  | 15.869 | cell organization and biogenesis;response to stimulus;transport                                                                                |
| P53597   | Succinate--CoA ligase [ADP/GDP-forming] subunit alpha, mitochondrial [OS=Homo sapiens] | SUCLG1  | 2 | 36  | 2 | 9  | 9.71   | metabolic process                                                                                                                              |
| Q96I99-1 | Succinate--CoA ligase [GDP-forming] subunit beta, mitochondrial [OS=Homo sapiens]      | SUCLG2  | 3 | 22  | 3 | 11 | 14.595 | metabolic process                                                                                                                              |
| Q9UH65   | Switch-associated protein 70 [OS=Homo sapiens]                                         | SWAP70  | 2 | 31  | 2 | 3  | 8.855  | cell organization and biogenesis;cellular homeostasis;metabolic process;regulation of biological process                                       |
| O60506   | Heterogeneous nuclear ribonucleoprotein Q [OS=Homo sapiens]                            | SYNCRIP | 8 | 101 | 5 | 15 | 31.724 | cell differentiation;metabolic process;regulation of biological process;response to stimulus                                                   |
| Q86WV6   | Stimulator of interferon genes protein [OS=Homo sapiens]                               | TMEM173 | 5 | 111 | 5 | 20 | 48.171 | cell death;defense response;regulation of biological process;response to stimulus;transport                                                    |
| Q92973-1 | transportin-1 [OS=Homo sapiens]                                                        | TNPO1   | 9 | 71  | 9 | 12 | 38.835 | cellular component movement;regulation of biological process;transport                                                                         |
| Q02880   | DNA topoisomerase 2-beta [OS=Homo sapiens]                                             | TOP2B   | 8 | 95  | 8 | 6  | 40.381 | cell organization and biogenesis;cellular component movement;metabolic process;regulation of biological process                                |

|          |                                                                          |                |    |      |    |    |         |                                                                                                                                                    |
|----------|--------------------------------------------------------------------------|----------------|----|------|----|----|---------|----------------------------------------------------------------------------------------------------------------------------------------------------|
| Q14258   | E3 ubiquitin/ISG15 ligase<br>TRIM25 [OS=Homo sapiens]                    | TRIM25         | 5  | 48   | 5  | 9  | 25.203  | defense response;metabolic<br>process;regulation of biological<br>process;response to stimulus                                                     |
| Q9BQE3   | Tubulin alpha-1C chain<br>[OS=Homo sapiens]                              | TUBA1<br>C     | 20 | 2147 | 3  | 62 | 253.702 | cell division;cell organization and<br>biogenesis;transport                                                                                        |
| P22695   | Cytochrome b-c1 complex<br>subunit 2, mitochondrial<br>[OS=Homo sapiens] | UQCRC<br>2     | 9  | 96   | 9  | 26 | 47.904  | metabolic process;transport                                                                                                                        |
| P45974-1 | Ubiquitin carboxyl-terminal<br>hydrolase 5 [OS=Homo sapiens]             | USP5           | 8  | 51   | 8  | 14 | 33.21   | metabolic process;regulation of<br>biological process                                                                                              |
| P26640   | Valine--tRNA ligase [OS=Homo<br>sapiens]                                 | VAR5;<br>VAR52 | 6  | 24   | 6  | 7  | 20.586  | metabolic process;regulation of<br>biological process                                                                                              |
| O75436-1 | Vacuolar protein sorting-<br>associated protein 26A<br>[OS=Homo sapiens] | VPS26A         | 2  | 15   | 2  | 9  | 7.735   | regulation of biological<br>process;response to<br>stimulus;transport                                                                              |
| P23381   | Tryptophan--tRNA ligase,<br>cytoplasmic [OS=Homo sapiens]                | WARS           | 3  | 28   | 3  | 10 | 11.966  | metabolic process;regulation of<br>biological process                                                                                              |
| Q9UIA9   | exportin-7 [OS=Homo sapiens]                                             | XPO7           | 4  | 40   | 4  | 4  | 14.299  | transport                                                                                                                                          |
| P12956   | X-ray repair cross-<br>complementing protein 6<br>[OS=Homo sapiens]      | XRCC6          | 15 | 173  | 15 | 31 | 70.545  | cell organization and<br>biogenesis;defense<br>response;metabolic<br>process;regulation of biological<br>process;response to<br>stimulus;transport |
| P31946   | 14-3-3 protein beta/alpha<br>[OS=Homo sapiens]                           | YWHAB          | 5  | 163  | 2  | 27 | 21.855  | cell organization and<br>biogenesis;metabolic<br>process;regulation of biological<br>process;response to<br>stimulus;transport                     |
| P63104-1 | 14-3-3 protein zeta/delta<br>[OS=Homo sapiens]                           | YWHAZ          | 7  | 207  | 5  | 29 | 57.138  | cell organization and<br>biogenesis;metabolic<br>process;regulation of biological<br>process;response to<br>stimulus;transport                     |
